# Supplementary material for: Tumour-based DNA methylation markers of breast cancer survival: A pooled analysis of 2,157 cases
Source: Research Square preprint supplement (doi:10.21203/rs.3.rs-8023797/v1), 2025-11-28
Supplement: Supplementary file 2 [file b9077f5be87c6fa0e5e8ebd7.xlsx]

## Sheet: Table S3a
Table S3a. Primary EWAS (N=1,992 cases), age-adjusted model, and replication results in GSE141441 (N=165 triple-negative tumours)
CpG	All cases; age-adjusted model (N cases = 1992; N deaths = 272)					GSE141441 (N cases = 165; N events = 69)				Replication
	SD	HR	Inf95CI	Sup95CI	P	Coef	SE	P	HR	Same direction (yes=1; no=0)	P<0.05 (yes=1; no=0)	Replicated (yes=1; no=0)
cg16461335	0.0554641	0.601815	0.539824	0.670926	5.41e-20	0.0116609	0.126135	0.926342	1.01173	0	0	0
cg04389921	0.0480166	0.666504	0.60664	0.732276	2.93e-17	0.0711274	0.126305	0.57334	1.07372	0	0	0
cg21184711	0.052127	0.646346	0.583573	0.715873	5.65e-17	0.0897039	0.124645	0.471724	1.09385	0	0	0
cg09289459	0.0470232	0.67809	0.618388	0.743556	1.44e-16	-0.080063	0.122674	0.513984	0.923058	1	0	0
cg13883981	0.0506147	0.659832	0.597517	0.728647	2.13e-16	-0.0101658	0.118566	0.931674	0.989886	1	0	0
cg25268863	0.055207	0.635501	0.570327	0.708122	2.18e-16	-0.287706	0.119102	0.0157081	0.749982	1	1	1
cg07456681	0.0632827	0.595543	0.526074	0.674186	2.61e-16	-0.155565	0.119917	0.194537	0.855932	1	0	0
cg09610644	0.0480394	0.674818	0.61418	0.741443	2.67e-16	-0.168541	0.121	0.163648	0.844896	1	0	0
cg09866695	0.0580895	0.621827	0.554912	0.696812	2.87e-16	-0.225249	0.121923	0.0646786	0.798318	1	0	0
cg05976283	0.0564147	0.633112	0.56684	0.707132	5.38e-16	-0.183674	0.128454	0.15275	0.832207	1	0	0
cg17712416	0.0402834	0.721892	0.667087	0.781198	5.98e-16	-0.367674	0.112261	0.00105599	0.692343	1	1	1
cg19640779	0.0542569	0.644783	0.579735	0.717128	6.05e-16	-0.338357	0.111538	0.00241689	0.712941	1	1	1
cg27070397	0.0571209	0.632098	0.565149	0.706978	9.71e-16	-0.119793	0.12081	0.321401	0.887104	1	0	0
cg18128976	0.0538879	0.648746	0.583721	0.721015	9.76e-16	-0.289262	0.116197	0.0127956	0.748816	1	1	1
cg15511120	0.0581287	0.627486	0.559918	0.703207	1.08e-15	-0.320342	0.122634	0.00899694	0.725901	1	1	1
cg19194095	0.0476596	0.683522	0.622565	0.750447	1.42e-15	0.0832765	0.12226	0.495781	1.08684	0	0	0
cg24846807	0.0542596	0.648473	0.583051	0.721237	1.43e-15	-0.133156	0.124596	0.285207	0.875329	1	0	0
cg03281139	0.0755574	0.548462	0.472968	0.636006	1.87e-15	-0.414624	0.145912	0.00448876	0.660589	1	1	1
cg13596833	0.0556714	1.55614	1.39527	1.73554	1.97e-15	0.21788	0.139899	0.119374	1.24344	1	0	0
cg02744945	0.0626591	0.60851	0.538186	0.688024	2.23e-15	-0.150484	0.124607	0.227175	0.860291	1	0	0
cg06024930	0.0553024	0.645251	0.578969	0.719121	2.33e-15	-0.197851	0.118837	0.0959353	0.820492	1	0	0
cg16970357	0.0567175	1.55897	1.39495	1.74227	4.93e-15	0.149191	0.139805	0.28591	1.1609	1	0	0
cg19823504	0.0553354	0.648798	0.582113	0.723121	5.35e-15	-0.275914	0.12591	0.0284255	0.758878	1	1	1
cg20459430	0.0456158	0.700105	0.640228	0.765581	5.46e-15	-0.157267	0.113076	0.164284	0.854476	1	0	0
cg03458229	0.0496545	0.680687	0.617563	0.750263	9.44e-15	-0.175921	0.117694	0.134986	0.838684	1	0	0
cg05072470	0.0574681	1.5606	1.39436	1.74666	9.59e-15	0.201257	0.135847	0.138476	1.22294	1	0	0
cg20829834	0.0567345	0.646047	0.578058	0.722032	1.36e-14	-0.283107	0.123389	0.0217656	0.753439	1	1	1
cg10799386	0.0566113	0.646966	0.57902	0.722884	1.45e-14	0.0244246	0.12429	0.844208	1.02473	0	0	0
cg14270346	0.0626903	0.618153	0.546681	0.698969	1.68e-14	-0.378142	0.127176	0.00294545	0.685133	1	1	1
cg06392698	0.0529838	0.666437	0.600702	0.739365	1.87e-14	-0.375575	0.121794	0.00204452	0.686894	1	1	1
cg00138126	0.0592779	0.636201	0.566418	0.714581	2.36e-14	-0.0164307	0.122996	0.893729	0.983704	1	0	0
cg02319392	0.0674162	0.598295	0.524241	0.682811	2.55e-14	-0.187595	0.121659	0.123081	0.82895	1	0	0
cg24505073	0.0538083	0.663727	0.597294	0.73755	2.59e-14	-0.084021	0.118168	0.477065	0.919412	1	0	0
cg25439883	0.0605207	0.631024	0.560442	0.710496	2.79e-14	-0.151929	0.121829	0.212372	0.859049	1	0	0
cg15979171	0.053862	0.663967	0.597447	0.737894	2.89e-14	-0.0312991	0.119385	0.793191	0.969186	1	0	0
cg03401357	0.0591005	1.5658	1.39453	1.75809	3.27e-14	0.000193277	0.134451	0.998853	1.00019	1	0	0
cg15210427	0.064117	0.614873	0.542262	0.697207	3.32e-14	0.0185055	0.119969	0.87741	1.01868	0	0	0
cg20208990	0.0579935	0.64502	0.575717	0.722665	4.01e-14	-0.137503	0.120899	0.255398	0.871532	1	0	0
cg00393263	0.0516812	0.676868	0.611664	0.749022	4.3e-14	-0.317325	0.112573	0.00481963	0.728094	1	1	1
cg25305776	0.055284	0.658961	0.591292	0.734375	4.54e-14	0.00860794	0.121016	0.943294	1.00865	0	0	0
cg18098004	0.0529606	0.670859	0.604715	0.744237	4.79e-14	0.0118814	0.122773	0.922905	1.01195	0	0	0
cg05437648	0.0527044	0.672746	0.606721	0.745956	5.44e-14	-0.391961	0.120838	0.00117993	0.67573	1	1	1
cg18222192	0.0671966	0.604578	0.529974	0.689684	6.95e-14	-0.147663	0.121816	0.225444	0.862722	1	0	0
cg03015790	0.055762	1.5165	1.3595	1.69164	8.17e-14	0.166	0.123809	0.179996	1.18057	1	0	0
cg00767977	0.0608186	0.635127	0.563757	0.715533	8.41e-14	-0.0119242	0.120996	0.921495	0.988147	1	0	0
cg07051833	0.0599033	0.639564	0.568714	0.719239	8.55e-14	0.000653669	0.126451	0.995875	1.00065	0	0	0
cg09530438	0.0576979	0.650358	0.580818	0.728224	8.88e-14	0.000647781	0.124914	0.995862	1.00065	0	0	0
cg02855045	0.0551688	0.662841	0.594908	0.738532	9.07e-14	-0.0702819	0.110073	0.523147	0.932131	1	0	0
cg04651583	0.0511439	0.683122	0.617966	0.755148	9.25e-14	-0.236688	0.117825	0.0445572	0.789238	1	1	1
cg08729686	0.0585905	1.54722	1.37936	1.73549	9.39e-14	0.0220455	0.125135	0.860158	1.02229	1	0	0
cg26027052	0.0623911	0.628357	0.556031	0.71009	9.52e-14	-0.264211	0.130295	0.0425824	0.767812	1	1	1
cg21214521	0.062753	0.626965	0.554406	0.709021	1.01e-13	-0.0244159	0.123438	0.843203	0.97588	1	0	0
cg05508862	0.0564704	0.65761	0.588709	0.734574	1.15e-13	-0.0402218	0.127329	0.752087	0.960576	1	0	0
cg04878240	0.0532583	0.673523	0.606763	0.747629	1.16e-13	-0.123633	0.116957	0.290475	0.883704	1	0	0
cg27284041	0.0533748	0.67296	0.606117	0.747175	1.17e-13	-0.0101411	0.117465	0.931202	0.98991	1	0	0
cg27051231	0.0622786	0.630118	0.557712	0.711923	1.21e-13	-0.180897	0.12429	0.145548	0.834521	1	0	0
cg22075146	0.0629501	0.627154	0.554358	0.709508	1.25e-13	-0.0667385	0.129639	0.606692	0.93544	1	0	0
cg17150663	0.056401	0.65838	0.589478	0.735335	1.26e-13	-0.132428	0.116782	0.256807	0.875966	1	0	0
cg26065841	0.0544175	0.668132	0.60054	0.743332	1.26e-13	-0.0621539	0.115169	0.58942	0.939738	1	0	0
cg06704573	0.0551553	0.664705	0.596596	0.740589	1.31e-13	-0.0497349	0.121445	0.682153	0.951482	1	0	0
cg17315844	0.0620283	0.632675	0.560251	0.714463	1.58e-13	-0.219547	0.127549	0.0852015	0.802883	1	0	0
cg18443571	0.0622104	0.632068	0.559513	0.714031	1.65e-13	-0.345081	0.12218	0.0047373	0.708163	1	1	1
cg11113931	0.061727	0.634532	0.562226	0.716136	1.72e-13	-0.355202	0.128317	0.00563733	0.701031	1	1	1
cg02902186	0.0578018	0.65322	0.583255	0.731578	1.74e-13	-0.233719	0.130771	0.073898	0.791584	1	0	0
cg15688070	0.0580879	0.652511	0.582296	0.731194	1.99e-13	-0.28921	0.134198	0.0311546	0.748855	1	1	1
cg25609954	0.0595853	0.645388	0.574251	0.725337	1.99e-13	-0.135552	0.118986	0.254606	0.873234	1	0	0
cg03249995	0.0555224	0.665093	0.596515	0.741554	2.05e-13	-0.0853896	0.115747	0.460682	0.918155	1	0	0
cg01792117	0.0555877	0.664984	0.596341	0.741528	2.14e-13	0.00571768	0.122847	0.962877	1.00573	0	0	0
cg17967602	0.0540155	0.67284	0.605249	0.74798	2.2e-13	0.0171574	0.126158	0.891823	1.01731	0	0	0
cg27622701	0.0628175	0.630796	0.557723	0.713443	2.22e-13	-0.263686	0.138243	0.0564674	0.768215	1	0	0
cg26569315	0.0621206	0.634603	0.561856	0.716769	2.47e-13	-0.241006	0.112619	0.0323545	0.785837	1	1	1
cg01798157	0.0551425	1.49656	1.34325	1.66737	2.64e-13	0.186194	0.132504	0.159962	1.20466	1	0	0
cg11310191	0.0527391	0.680105	0.613316	0.754167	2.68e-13	0.0387968	0.12128	0.749048	1.03956	0	0	0
cg01815090	0.0468902	0.709887	0.647554	0.778219	2.72e-13	-0.213782	0.119713	0.0741331	0.807525	1	0	0
cg05156582	0.0547564	0.670607	0.602364	0.74658	2.94e-13	-0.0994478	0.119276	0.404417	0.905337	1	0	0
cg11601252	0.0652631	1.60921	1.41599	1.82879	3.11e-13	0.155382	0.135707	0.252218	1.1681	1	0	0
cg18795232	0.0579913	0.655459	0.585037	0.734358	3.24e-13	-0.12594	0.119865	0.293404	0.881668	1	0	0
cg14439629	0.0550671	1.49297	1.34022	1.66312	3.39e-13	0.196619	0.126136	0.119047	1.21728	1	0	0
cg02515467	0.0581834	0.654847	0.58427	0.733948	3.43e-13	-0.144309	0.120778	0.232155	0.865621	1	0	0
cg16308148	0.049015	0.700408	0.636252	0.771032	3.73e-13	0.0840467	0.121512	0.489142	1.08768	0	0	0
cg19411734	0.0614484	0.640266	0.567617	0.722214	3.99e-13	-0.0589887	0.125951	0.639537	0.942717	1	0	0
cg15711288	0.0561081	0.665875	0.596532	0.74328	4.24e-13	-0.413983	0.128013	0.00122106	0.661012	1	1	1
cg12656291	0.0581881	1.52454	1.36022	1.70871	4.26e-13	0.238795	0.122827	0.0518762	1.26972	1	0	0
cg24828648	0.0544857	0.673788	0.605543	0.749724	4.27e-13	0.15507	0.12511	0.215174	1.16774	0	0	0
cg12241963	0.0640544	0.628683	0.554509	0.712779	4.3e-13	-0.236809	0.128309	0.0649485	0.789142	1	0	0
cg04906886	0.0589744	0.652402	0.581187	0.732342	4.42e-13	-0.263179	0.116065	0.0233582	0.768604	1	1	1
cg15824543	0.0601732	0.660545	0.590381	0.739048	4.56e-13	-0.0422219	0.119489	0.723824	0.958657	1	0	0
cg12807237	0.0572955	0.646922	0.574953	0.7279	4.56e-13	-0.0197041	0.128359	0.877998	0.980489	1	0	0
cg06104859	0.0643739	0.676817	0.608849	0.752372	4.85e-13	-0.104511	0.119543	0.381981	0.900765	1	0	0
cg24845165	0.0539961	0.627894	0.553466	0.71233	4.85e-13	0.00454249	0.122477	0.970414	1.00455	0	0	0
cg15054281	0.062806	0.635151	0.561586	0.718352	4.94e-13	-0.0497746	0.122968	0.685641	0.951444	1	0	0
cg02704907	0.0526202	0.683904	0.616886	0.758203	5.18e-13	-0.0973042	0.115824	0.400851	0.90728	1	0	0
cg21660861	0.0538992	0.678201	0.61021	0.753768	5.83e-13	-0.225385	0.125168	0.0717561	0.798209	1	0	0
cg11051139	0.0578742	0.659124	0.588443	0.738294	5.91e-13	-0.293538	0.120916	0.0151985	0.745621	1	1	1
cg11273176	0.0581801	0.657787	0.586897	0.737239	6.04e-13	-0.310373	0.118856	0.00901896	0.733173	1	1	1
cg13587908	0.0684873	0.611019	0.534267	0.698797	6.34e-13	0.133542	0.137979	0.333121	1.14287	0	0	0
cg27129012	0.0534113	0.681264	0.613553	0.756449	6.68e-13	-0.445903	0.120532	0.000216069	0.640246	1	1	1
cg17800124	0.0499607	0.69854	0.63338	0.770403	6.93e-13	-0.415196	0.111257	0.000190063	0.660211	1	1	1
cg06222012	0.0704068	0.603277	0.525516	0.692543	7.07e-13	0.253545	0.132323	0.0553522	1.28858	0	0	0
cg01676795	0.0564122	0.667082	0.597256	0.74507	7.15e-13	-0.0433406	0.126339	0.73156	0.957585	1	0	0
cg06019726	0.0644918	0.629689	0.55492	0.714531	7.4e-13	-0.264559	0.118403	0.0254569	0.767544	1	1	1
cg05237114	0.0549123	0.713131	0.650148	0.782215	7.69e-13	-0.0518091	0.124618	0.677598	0.94951	1	0	0
cg22528172	0.0471765	0.674666	0.605825	0.751329	7.69e-13	-0.0215643	0.118468	0.855562	0.978667	1	0	0
cg13808058	0.0591765	0.654397	0.582733	0.734873	7.74e-13	-0.321302	0.122912	0.00894647	0.725204	1	1	1
cg16753122	0.0602502	0.649389	0.577058	0.730786	7.75e-13	-0.0890157	0.126874	0.482925	0.914831	1	0	0
cg15864691	0.0576136	0.662135	0.591434	0.741289	8.3e-13	-0.124042	0.122638	0.311802	0.883343	1	0	0
cg22717593	0.056951	0.6653	0.595032	0.743865	8.33e-13	-0.00688184	0.119626	0.954124	0.993142	1	0	0
cg05315365	0.0498878	0.699965	0.634763	0.771864	8.64e-13	0.0812279	0.127067	0.522658	1.08462	0	0	0
cg02057755	0.0638942	0.63329	0.558747	0.717776	8.69e-13	-0.191985	0.133459	0.150285	0.82532	1	0	0
cg23972735	0.0640122	0.633067	0.558422	0.71769	9.19e-13	-0.251415	0.126253	0.0464414	0.777699	1	1	1
cg02374294	0.0568639	0.666407	0.596125	0.744976	9.52e-13	-0.116522	0.120752	0.334559	0.890011	1	0	0
cg11824191	0.0583768	0.659334	0.588051	0.739258	9.67e-13	-0.291871	0.123069	0.0177112	0.746865	1	1	1
cg05535113	0.0743497	0.588594	0.508779	0.68093	1.01e-12	-0.241784	0.128527	0.0599455	0.785226	1	0	0
cg02102684	0.0670019	0.620326	0.543986	0.707379	1.03e-12	-0.19643	0.127513	0.123446	0.821659	1	0	0
cg14471191	0.0547504	0.677239	0.608328	0.753955	1.09e-12	-0.0458818	0.122988	0.709104	0.955155	1	0	0
cg17129576	0.0507388	0.696997	0.631018	0.769874	1.12e-12	-0.191648	0.116868	0.101034	0.825597	1	0	0
cg16795184	0.0555868	0.673369	0.603862	0.750876	1.12e-12	-0.183283	0.120572	0.128482	0.832533	1	0	0
cg23178308	0.0502913	1.42942	1.29525	1.5775	1.21e-12	0.0710278	0.127725	0.578144	1.07361	1	0	0
cg27198497	0.0527822	0.687423	0.619863	0.762347	1.24e-12	-0.228506	0.119709	0.0562809	0.795721	1	0	0
cg25266629	0.0653161	1.6453	1.43401	1.88773	1.25e-12	0.103088	0.127969	0.420488	1.10859	1	0	0
cg27368333	0.07013	0.628916	0.553344	0.714808	1.25e-12	-0.088083	0.121725	0.469296	0.915685	1	0	0
cg26044621	0.0556356	0.673947	0.604322	0.751593	1.32e-12	-0.0120785	0.123495	0.922086	0.987994	1	0	0
cg14466942	0.0637127	1.57087	1.38646	1.77981	1.36e-12	-0.178713	0.123402	0.147557	0.836346	0	0	0
cg12769599	0.0676364	0.619291	0.542403	0.707077	1.39e-12	0.116241	0.121993	0.340665	1.12327	0	0	0
cg07854457	0.0693716	0.612172	0.534348	0.70133	1.5e-12	-0.0622498	0.126301	0.622104	0.939648	1	0	0
cg13552712	0.054264	0.681225	0.612492	0.75767	1.51e-12	-0.176154	0.118489	0.137102	0.838489	1	0	0
cg13008001	0.0582557	0.662258	0.5908	0.74236	1.51e-12	-0.143581	0.120324	0.232755	0.866251	1	0	0
cg12987910	0.0496952	1.42113	1.28924	1.56651	1.53e-12	0.0833463	0.124164	0.502055	1.08692	1	0	0
cg04204452	0.0584311	0.661558	0.589972	0.74183	1.54e-12	0.0700684	0.127512	0.582659	1.07258	0	0	0
cg19336191	0.0634955	0.638412	0.563707	0.723017	1.57e-12	-0.199267	0.125794	0.113179	0.819331	1	0	0
cg03669268	0.0559742	0.673431	0.603459	0.751517	1.62e-12	-0.0146223	0.120554	0.903459	0.985484	1	0	0
cg02592239	0.0557813	0.674406	0.604562	0.752321	1.64e-12	0.0527004	0.122595	0.667287	1.05411	0	0	0
cg07143805	0.0617998	0.64644	0.572696	0.72968	1.67e-12	0.0137741	0.125342	0.912494	1.01387	0	0	0
cg00232483	0.0621584	0.644863	0.570897	0.728411	1.69e-12	-0.301168	0.133576	0.0241544	0.739953	1	1	1
cg25515997	0.0565712	0.670826	0.600422	0.749486	1.7e-12	-0.278353	0.120883	0.0212976	0.757029	1	1	1
cg19388273	0.0720719	0.667992	0.597165	0.74722	1.72e-12	-0.282802	0.121742	0.0201815	0.753669	1	1	1
cg15702677	0.0571863	0.601381	0.522158	0.692623	1.72e-12	0.0852073	0.12886	0.50846	1.08894	0	0	0
cg16649560	0.0678714	0.619536	0.542369	0.707683	1.73e-12	-0.351767	0.136785	0.0101205	0.703444	1	1	1
cg20167126	0.0445717	1.36933	1.25478	1.49433	1.76e-12	-0.244896	0.139666	0.0795261	0.782786	0	0	0
cg18022224	0.0602142	1.52873	1.35855	1.72022	1.81e-12	-0.00339958	0.132256	0.979493	0.996606	0	0	0
cg03163545	0.0607483	0.651773	0.578612	0.734185	1.84e-12	-0.296961	0.130036	0.0223905	0.743073	1	1	1
cg06885910	0.0602202	0.654236	0.5814	0.736197	1.85e-12	-0.14082	0.132177	0.286702	0.868646	1	0	0
cg03910767	0.0514894	1.43703	1.29908	1.58962	1.9e-12	0.0146916	0.128801	0.909187	1.0148	1	0	0
cg18558767	0.0579979	0.664733	0.593307	0.744759	1.91e-12	-0.105155	0.125865	0.40346	0.900185	1	0	0
cg00887153	0.0773362	0.581135	0.4994	0.676248	2.25e-12	-0.145152	0.129757	0.263294	0.864891	1	0	0
cg27514874	0.0508525	0.699975	0.633574	0.773337	2.31e-12	-0.112271	0.111549	0.31419	0.893802	1	0	0
cg25203980	0.0397475	0.756717	0.700003	0.818025	2.33e-12	-0.278259	0.114943	0.0154849	0.757101	1	1	1
cg10626556	0.0553911	0.678354	0.608566	0.756145	2.45e-12	-0.184122	0.125997	0.143928	0.831834	1	0	0
cg26844633	0.0539283	0.685512	0.616753	0.761937	2.53e-12	-0.285504	0.118234	0.0157469	0.751636	1	1	1
cg09382096	0.0585254	1.50641	1.34316	1.68951	2.54e-12	0.296963	0.133376	0.0259804	1.34577	1	1	1
cg24702341	0.0752237	0.590883	0.509884	0.68475	2.67e-12	-0.15957	0.124273	0.199134	0.852511	1	0	0
cg10648960	0.0624316	0.64627	0.571836	0.730391	2.7e-12	-0.162864	0.129251	0.207647	0.849707	1	0	0
cg17076592	0.0491069	0.709572	0.644461	0.781261	2.81e-12	0.0670487	0.12034	0.577416	1.06935	0	0	0
cg05296619	0.0597495	0.658883	0.58607	0.740742	2.9e-12	-0.126999	0.12311	0.302263	0.880734	1	0	0
cg24812837	0.0713523	1.64569	1.43091	1.89271	2.92e-12	0.0800355	0.128376	0.532992	1.08333	1	0	0
cg14233374	0.0542173	0.684884	0.615839	0.76167	2.93e-12	-0.115582	0.121608	0.341887	0.890848	1	0	0
cg04471919	0.068341	0.620582	0.542784	0.709531	2.93e-12	-0.0944511	0.122532	0.44081	0.909872	1	0	0
cg14547509	0.0595644	0.659842	0.587136	0.741552	2.95e-12	-0.0434095	0.126856	0.732205	0.957519	1	0	0
cg03575373	0.0549911	0.681456	0.611828	0.759008	3.07e-12	-0.245425	0.126952	0.053211	0.782372	1	0	0
cg16788865	0.0650153	0.635716	0.559657	0.722111	3.22e-12	-0.102685	0.119025	0.38829	0.902411	1	0	0
cg14161165	0.0490913	0.710369	0.645205	0.782115	3.26e-12	-0.0116693	0.126408	0.926448	0.988399	1	0	0
cg22731981	0.0611642	0.653278	0.579475	0.73648	3.38e-12	-0.0365526	0.121369	0.763285	0.964107	1	0	0
cg19398496	0.0572623	0.671333	0.600063	0.751069	3.43e-12	-0.0298748	0.132898	0.822139	0.970567	1	0	0
cg03629107	0.0553595	0.680298	0.610347	0.758265	3.44e-12	-0.417777	0.129315	0.00123493	0.658509	1	1	1
cg11337160	0.0466127	0.723214	0.66007	0.792398	3.6e-12	-0.196413	0.113917	0.0846741	0.821672	1	0	0
cg02422282	0.0524209	0.694597	0.626776	0.769757	3.6e-12	-0.0181569	0.112824	0.872148	0.982007	1	0	0
cg25649784	0.0552389	0.681385	0.611467	0.759298	3.79e-12	-0.0884869	0.126173	0.483109	0.915315	1	0	0
cg04812351	0.0726235	0.603994	0.523861	0.696386	3.85e-12	-0.0658228	0.130755	0.614679	0.936297	1	0	0
cg12792775	0.0803849	0.572365	0.488933	0.670034	3.88e-12	-0.150575	0.134488	0.262876	0.860213	1	0	0
cg25527494	0.0559618	1.47468	1.32148	1.64563	3.89e-12	0.09178	0.137526	0.50454	1.09612	1	0	0
cg17024257	0.0515718	0.663673	0.591025	0.74525	4.18e-12	-0.273208	0.116411	0.0189291	0.760934	1	1	1
cg15168816	0.0591492	1.42968	1.29223	1.58174	4.18e-12	-0.18612	0.134567	0.166633	0.830174	0	0	0
cg26620900	0.0466955	0.723965	0.660648	0.79335	4.6e-12	-0.121243	0.111544	0.277055	0.885819	1	0	0
cg24361823	0.0523584	0.696502	0.628572	0.771774	4.92e-12	-0.0327511	0.115768	0.777252	0.967779	1	0	0
cg00936699	0.050534	0.705343	0.63883	0.77878	4.93e-12	-0.17168	0.132889	0.196392	0.842249	1	0	0
cg07124117	0.0630422	1.54559	1.36594	1.74886	4.96e-12	0.341413	0.1403	0.0149561	1.40693	1	1	1
cg15161225	0.0435774	0.740179	0.679585	0.806177	5.05e-12	-0.194049	0.107069	0.0699293	0.823617	1	0	0
cg25117092	0.0563423	0.677823	0.606957	0.756964	5.13e-12	-0.16928	0.112825	0.133516	0.844272	1	0	0
cg13357249	0.0605932	0.658264	0.584552	0.741271	5.17e-12	-0.116036	0.120031	0.333686	0.890443	1	0	0
cg19687230	0.0666924	0.631245	0.553897	0.719394	5.26e-12	-0.182136	0.124909	0.144798	0.833488	1	0	0
cg07802350	0.0605056	1.51776	1.34804	1.70886	5.35e-12	0.0140125	0.131067	0.914859	1.01411	1	0	0
cg20276677	0.0556377	0.681422	0.611023	0.759933	5.42e-12	0.060656	0.125009	0.627526	1.06253	0	0	0
cg00215851	0.0539553	0.689385	0.620204	0.766282	5.43e-12	-0.0272433	0.125508	0.828159	0.973124	1	0	0
cg13352717	0.0440924	0.738068	0.676963	0.804689	5.65e-12	-0.245964	0.116782	0.0351892	0.78195	1	1	1
cg15093997	0.0669885	0.630421	0.552854	0.718872	5.69e-12	-0.207184	0.127805	0.104998	0.81287	1	0	0
cg09378456	0.0540571	0.689179	0.619895	0.766205	5.72e-12	-0.0103073	0.118712	0.93081	0.989746	1	0	0
cg16601494	0.0647942	1.56192	1.37565	1.77343	5.9e-12	0.287695	0.136544	0.0351201	1.33335	1	1	1
cg07225255	0.0604364	0.659788	0.586086	0.74276	5.96e-12	-0.226809	0.116591	0.0517348	0.797073	1	0	0
cg04295172	0.0547011	0.686351	0.616573	0.764025	5.97e-12	-0.17675	0.124708	0.156393	0.837989	1	0	0
cg06011086	0.0636173	0.620814	0.541944	0.711163	6.12e-12	-0.231245	0.130064	0.0754156	0.793545	1	0	0
cg06312283	0.0693228	1.54882	1.36725	1.75449	6.12e-12	0.164675	0.135547	0.224406	1.17901	1	0	0
cg17472664	0.0599025	0.662477	0.58909	0.745006	6.24e-12	-0.00563802	0.124921	0.964002	0.994378	1	0	0
cg00828439	0.0507105	0.705759	0.638987	0.77951	6.33e-12	-0.282329	0.122783	0.0214809	0.754025	1	1	1
cg17280740	0.0671424	1.58617	1.39059	1.80926	6.38e-12	0.0912097	0.138513	0.510221	1.0955	1	0	0
cg05797623	0.0696844	0.619654	0.540548	0.710338	6.51e-12	-0.0955242	0.129239	0.459831	0.908896	1	0	0
cg19947621	0.054616	0.687245	0.617479	0.764893	6.54e-12	-0.162113	0.122967	0.187388	0.850345	1	0	0
cg21841632	0.0620024	0.653704	0.578902	0.738173	7.07e-12	0.0284796	0.121526	0.814713	1.02889	0	0	0
cg15487725	0.055034	0.685767	0.615646	0.763873	7.17e-12	-0.23033	0.117279	0.0495353	0.794271	1	1	1
cg23862011	0.0503445	0.708206	0.641662	0.781651	7.22e-12	0.133648	0.124622	0.283529	1.14299	0	0	0
cg15200711	0.0533661	0.693738	0.624842	0.77023	7.29e-12	-0.0358531	0.12307	0.770805	0.964782	1	0	0
cg01755336	0.0534463	0.693418	0.624455	0.769996	7.37e-12	-0.0467719	0.121993	0.701425	0.954305	1	0	0
cg26813796	0.0489984	0.714948	0.649481	0.787013	7.48e-12	-0.0437874	0.108793	0.687328	0.957157	1	0	0
cg04504066	0.0555829	1.46319	1.31217	1.6316	7.5e-12	0.242856	0.131692	0.0651649	1.27489	1	0	0
cg06373167	0.0653196	1.56392	1.37598	1.77752	7.58e-12	-0.0313732	0.128503	0.807119	0.969114	0	0	0
cg13888748	0.0522381	0.69934	0.631282	0.774735	7.6e-12	-0.128641	0.111843	0.250065	0.879289	1	0	0
cg27000496	0.0542389	0.689857	0.620284	0.767233	7.64e-12	-0.0906249	0.121305	0.455013	0.91336	1	0	0
cg04795044	0.0566208	0.678779	0.607481	0.758445	7.75e-12	-0.141986	0.12069	0.239413	0.867633	1	0	0
cg14378231	0.0587584	0.668958	0.596188	0.750609	7.8e-12	-0.242327	0.118922	0.0415796	0.7848	1	1	1
cg21017775	0.0584534	0.670599	0.598009	0.752001	8.15e-12	0.0351023	0.122018	0.77359	1.03573	0	0	0
cg20022869	0.058788	0.669077	0.59626	0.750787	8.16e-12	-0.11485	0.116491	0.324176	0.8915	1	0	0
cg06748884	0.057765	0.673797	0.601671	0.754568	8.2e-12	-0.196723	0.120452	0.102425	0.821419	1	0	0
cg01719494	0.0468825	0.725833	0.66211	0.795689	8.21e-12	-0.172995	0.116605	0.137915	0.841142	1	0	0
cg13958199	0.0627707	0.651198	0.575814	0.73645	8.29e-12	-0.198461	0.120693	0.100105	0.819992	1	0	0
cg24674887	0.0556034	0.684119	0.613483	0.762889	8.65e-12	-0.116524	0.126414	0.356654	0.890009	1	0	0
cg15487867	0.0632193	1.53913	1.35976	1.74215	9.05e-12	0.30777	0.139032	0.0268518	1.36039	1	1	1
cg09982347	0.0632223	0.649732	0.57401	0.735443	9.08e-12	-0.198607	0.133283	0.136195	0.819872	1	0	0
cg23503342	0.052128	0.700808	0.632743	0.776194	9.09e-12	-0.277251	0.112291	0.0135473	0.757864	1	1	1
cg08567517	0.0635433	0.648327	0.572408	0.734315	9.11e-12	-0.130371	0.123467	0.291008	0.87777	1	0	0
cg20103263	0.0580931	0.673134	0.600693	0.754311	9.53e-12	-0.0840396	0.122705	0.493414	0.919395	1	0	0
cg26539468	0.0526867	0.698419	0.629896	0.774396	9.58e-12	-0.14258	0.117749	0.225941	0.867118	1	0	0
cg20906753	0.0537437	0.693486	0.624153	0.77052	9.72e-12	0.138847	0.124136	0.263351	1.14895	0	0	0
cg11586591	0.0551407	0.68693	0.616562	0.76533	9.74e-12	-0.294686	0.115464	0.010705	0.744765	1	1	1
cg18997137	0.0593892	0.667468	0.594125	0.749864	9.96e-12	-0.101159	0.126848	0.425172	0.90379	1	0	0
cg25767870	0.054903	0.688197	0.617987	0.766384	1e-11	-0.229312	0.116285	0.0486119	0.795081	1	1	1
cg03985360	0.0717372	0.613771	0.533266	0.706431	1.01e-11	-0.186026	0.12189	0.126966	0.830252	1	0	0
cg06159375	0.0516085	0.703942	0.63622	0.778872	1.03e-11	-0.128967	0.122715	0.293282	0.879003	1	0	0
cg08778316	0.059758	0.666031	0.592418	0.748791	1.04e-11	-0.149307	0.125924	0.235746	0.861305	1	0	0
cg23433370	0.0649461	0.643143	0.566272	0.730449	1.07e-11	-0.031925	0.124273	0.79726	0.968579	1	0	0
cg07293445	0.0559365	1.48779	1.32669	1.66846	1.09e-11	0.125922	0.129752	0.331807	1.13419	1	0	0
cg07617759	0.0584742	0.683819	0.612813	0.763052	1.09e-11	-0.0483098	0.120949	0.689581	0.952839	1	0	0
cg12893030	0.0644961	0.64552	0.568867	0.732502	1.15e-11	-0.204078	0.127666	0.109926	0.815399	1	0	0
cg17279103	0.0509406	0.707798	0.640543	0.782114	1.17e-11	-0.0167028	0.117908	0.887349	0.983436	1	0	0
cg18082638	0.0617625	1.51926	1.34604	1.71476	1.27e-11	0.277043	0.138598	0.04562	1.31922	1	1	1
cg04055345	0.0615849	0.67391	0.601108	0.755529	1.32e-11	-0.258034	0.120484	0.0322219	0.772569	1	1	1
cg07362328	0.0583284	1.51697	1.34448	1.71158	1.32e-11	0.0333457	0.133219	0.80235	1.03391	1	0	0
cg09113530	0.0488946	0.664822	0.590652	0.748306	1.34e-11	-0.137803	0.117582	0.241207	0.87127	1	0	0
cg08726446	0.0603544	1.392	1.2648	1.532	1.34e-11	0.091721	0.122674	0.454652	1.09606	1	0	0
cg18565510	0.0474681	0.725384	0.660942	0.79611	1.35e-11	-0.152015	0.131126	0.246332	0.858976	1	0	0
cg21342910	0.0647525	1.54894	1.36432	1.75854	1.4e-11	0.0858526	0.139793	0.539122	1.08965	1	0	0
cg14434745	0.0530251	0.698958	0.629964	0.775508	1.43e-11	-0.290378	0.119377	0.0149974	0.747981	1	1	1
cg11820154	0.0548037	0.690624	0.620287	0.768937	1.44e-11	-0.164169	0.123115	0.182383	0.848599	1	0	0
cg09334636	0.0587667	0.672403	0.599249	0.754488	1.44e-11	-0.150924	0.120753	0.211352	0.859913	1	0	0
cg08170519	0.0597151	0.668126	0.594332	0.751083	1.44e-11	-0.0710961	0.12104	0.556949	0.931372	1	0	0
cg06986734	0.063716	0.650412	0.574054	0.736925	1.47e-11	-0.303162	0.13009	0.0197848	0.738479	1	1	1
cg26389380	0.0791893	0.586074	0.501818	0.684476	1.51e-11	-0.104826	0.131476	0.425275	0.900481	1	0	0
cg03344767	0.077905	0.629915	0.550762	0.720445	1.52e-11	0.0138217	0.123176	0.910656	1.01392	0	0	0
cg09737197	0.068513	0.591239	0.507516	0.688773	1.52e-11	0.00260952	0.11745	0.982274	1.00261	0	0	0
cg25714115	0.0666273	0.638138	0.560017	0.727156	1.56e-11	-0.160605	0.130589	0.218753	0.851628	1	0	0
cg11343506	0.059197	0.671105	0.597588	0.753666	1.61e-11	0.00649172	0.121982	0.957558	1.00651	0	0	0
cg24004478	0.0307494	1.23014	1.1582	1.30656	1.63e-11	0.0959691	0.158227	0.544164	1.10073	1	0	0
cg05650628	0.0593357	0.670627	0.597	0.753334	1.66e-11	0.0630345	0.128429	0.623559	1.06506	0	0	0
cg25373630	0.0669168	1.56902	1.37616	1.78891	1.68e-11	0.375622	0.142559	0.0084175	1.4559	1	1	1
cg03175417	0.0558811	0.686559	0.615335	0.766027	1.7e-11	-0.453591	0.116097	9.34e-05	0.635342	1	1	1
cg13342634	0.0563025	0.638378	0.560133	0.727552	1.72e-11	-0.27884	0.130171	0.0321858	0.756661	1	1	1
cg04443870	0.0667132	0.684675	0.61314	0.764555	1.72e-11	-0.0474186	0.121478	0.69628	0.953688	1	0	0
cg24046017	0.0574775	0.679314	0.60694	0.760318	1.73e-11	-0.255791	0.127548	0.0449148	0.774304	1	1	1
cg24959938	0.0474449	0.726764	0.662229	0.797588	1.73e-11	0.11076	0.135013	0.41201	1.11713	0	0	0
cg08371223	0.054215	0.694424	0.62442	0.772277	1.74e-11	-0.228028	0.113905	0.0452949	0.796102	1	1	1
cg08239297	0.0484023	0.722156	0.656797	0.794019	1.75e-11	-0.22034	0.120075	0.0665039	0.802246	1	0	0
cg16096766	0.0501661	0.713689	0.646856	0.787427	1.77e-11	-0.144516	0.114467	0.206764	0.865441	1	0	0
cg00768574	0.053412	0.698344	0.628934	0.775414	1.79e-11	-0.0684897	0.124943	0.583577	0.933803	1	0	0
cg27077673	0.0596684	0.669599	0.595696	0.75267	1.8e-11	-0.0961555	0.121963	0.430465	0.908323	1	0	0
cg00407944	0.0619746	0.65942	0.583995	0.744587	1.83e-11	-0.0461167	0.117844	0.695548	0.954931	1	0	0
cg16753685	0.0555875	0.688558	0.617482	0.767816	1.91e-11	0.0711049	0.130919	0.587047	1.07369	0	0	0
cg20829967	0.0520385	0.705194	0.636815	0.780915	1.92e-11	-0.199046	0.119818	0.0966646	0.819512	1	0	0
cg10784519	0.0520488	1.41782	1.28032	1.57009	1.98e-11	0.208261	0.128374	0.104738	1.23154	1	0	0
cg25726128	0.0544953	0.693859	0.623569	0.772072	1.99e-11	-0.140039	0.119839	0.242583	0.869325	1	0	0
cg15152362	0.0457077	1.35871	1.24228	1.48605	1.99e-11	0.113927	0.125225	0.36294	1.12067	1	0	0
cg05458220	0.0595949	0.611228	0.529308	0.705828	2.01e-11	-0.106075	0.131646	0.420379	0.899357	1	0	0
cg17083099	0.0734201	0.670586	0.59666	0.753671	2.01e-11	0.0211772	0.122514	0.862766	1.0214	0	0	0
cg00991994	0.0549717	0.691763	0.621105	0.770458	2.03e-11	-0.179606	0.118503	0.129615	0.835599	1	0	0
cg03037684	0.0593556	0.671735	0.597963	0.754608	2.03e-11	-0.0241014	0.124761	0.846817	0.976187	1	0	0
cg26475541	0.0594631	0.671276	0.597429	0.754252	2.04e-11	-0.00780255	0.126964	0.950997	0.992228	1	0	0
cg16589830	0.0589199	0.673848	0.600356	0.756335	2.09e-11	-0.251419	0.125163	0.0445662	0.777697	1	1	1
cg26504229	0.055262	1.44787	1.29924	1.6135	2.13e-11	0.0547462	0.123571	0.657741	1.05627	1	0	0
cg16459281	0.0499711	0.715612	0.648847	0.789247	2.14e-11	-0.329877	0.10443	0.00158411	0.719013	1	1	1
cg02960777	0.0527172	0.702679	0.6337	0.779165	2.18e-11	-0.281334	0.119476	0.0185363	0.754776	1	1	1
cg07287698	0.0514442	0.708996	0.640995	0.784212	2.31e-11	-0.0892898	0.123122	0.468321	0.914581	1	0	0
cg15681255	0.0674156	0.637342	0.558455	0.727372	2.36e-11	-0.244461	0.128537	0.0571872	0.783126	1	0	0
cg13688312	0.0579376	0.67902	0.60613	0.760675	2.37e-11	-0.257899	0.118128	0.02902	0.772673	1	1	1
cg10410146	0.0652684	0.646614	0.568969	0.734855	2.39e-11	-0.311384	0.120267	0.00962269	0.732432	1	1	1
cg06669276	0.050919	1.40509	1.27164	1.55256	2.4e-11	0.0691282	0.128773	0.59139	1.07157	1	0	0
cg22719826	0.0482471	0.724662	0.659277	0.796533	2.47e-11	0.192988	0.138293	0.162865	1.21287	0	0	0
cg26809043	0.0564216	0.701257	0.631832	0.77831	2.52e-11	-0.122691	0.119161	0.303186	0.884537	1	0	0
cg00501904	0.0531902	0.686291	0.614444	0.76654	2.52e-11	-0.106956	0.136076	0.431866	0.898565	1	0	0
cg22768358	0.0537543	0.698755	0.628882	0.776392	2.59e-11	-0.210713	0.112631	0.0613697	0.810006	1	0	0
cg27504738	0.0660927	0.643713	0.565502	0.732741	2.65e-11	-0.101622	0.121102	0.401389	0.903371	1	0	0
cg05739476	0.0699096	0.627617	0.547253	0.719784	2.68e-11	0.0515131	0.121933	0.672682	1.05286	0	0	0
cg01196858	0.0651222	0.648073	0.570416	0.736302	2.73e-11	-0.0851548	0.125571	0.497683	0.91837	1	0	0
cg25612480	0.0594136	0.634006	0.554421	0.725015	2.76e-11	-0.343832	0.122085	0.00485744	0.709048	1	1	1
cg14089067	0.0684369	0.67325	0.599243	0.756396	2.76e-11	0.0662512	0.125006	0.596123	1.0685	0	0	0
cg25520146	0.057288	0.688002	0.616279	0.768071	2.78e-11	-0.128201	0.121122	0.289854	0.879677	1	0	0
cg00327332	0.0561698	0.682893	0.610364	0.76404	2.78e-11	0.15606	0.124339	0.209437	1.1689	0	0	0
cg10869531	0.0523181	0.705963	0.63716	0.782195	2.83e-11	-0.239755	0.118009	0.042187	0.786821	1	1	1
cg23568324	0.0571915	0.672099	0.59787	0.755545	2.84e-11	-0.27539	0.124381	0.0268228	0.759276	1	1	1
cg02657245	0.0597119	0.68346	0.610987	0.76453	2.84e-11	-0.123209	0.122238	0.313479	0.884078	1	0	0
cg20873416	0.0528368	1.42121	1.28139	1.57628	2.88e-11	0.135617	0.128229	0.29023	1.14524	1	0	0
cg07275979	0.0498105	0.717973	0.651193	0.791603	2.9e-11	-0.430069	0.119671	0.000325941	0.650464	1	1	1
cg19165640	0.0566123	0.610758	0.528161	0.706272	2.91e-11	-0.056417	0.129956	0.6642	0.945145	1	0	0
cg09296536	0.0741338	0.686244	0.614172	0.766773	2.91e-11	0.0400336	0.124002	0.746811	1.04085	0	0	0
cg16306898	0.0621711	1.51193	1.33848	1.70786	2.95e-11	0.302735	0.132004	0.0218268	1.35356	1	1	1
cg03187411	0.0693976	0.630407	0.550237	0.722258	2.96e-11	-0.179364	0.12375	0.147224	0.835801	1	0	0
cg22108374	0.0667991	0.641553	0.562824	0.731294	3.04e-11	-0.224423	0.136502	0.100154	0.798977	1	0	0
cg22340475	0.0566241	0.686501	0.614388	0.767078	3.08e-11	0.0596521	0.125501	0.634565	1.06147	0	0	0
cg04118102	0.0566324	0.686487	0.614365	0.767075	3.09e-11	-0.0706286	0.121896	0.562308	0.931808	1	0	0
cg24253136	0.0620769	0.662129	0.586277	0.747795	3.1e-11	0.0413546	0.122072	0.734781	1.04222	0	0	0
cg15471073	0.0476242	0.72893	0.663969	0.800246	3.16e-11	-0.0560882	0.112515	0.618135	0.945456	1	0	0
cg14097773	0.0566762	0.686487	0.614313	0.767141	3.2e-11	0.0392174	0.120047	0.743908	1.04	0	0	0
cg19100138	0.0437672	1.33678	1.22689	1.45652	3.31e-11	-0.221911	0.145553	0.127357	0.800986	0	0	0
cg00472758	0.0541866	0.698247	0.627893	0.776485	3.39e-11	-0.0108979	0.12897	0.932659	0.989161	1	0	0
cg09276451	0.0654314	0.648123	0.570115	0.736805	3.4e-11	-0.109077	0.122417	0.372914	0.896661	1	0	0
cg09899496	0.0546808	0.696108	0.625363	0.774856	3.48e-11	-0.299677	0.119874	0.0124217	0.741057	1	1	1
cg00007326	0.0521722	0.707807	0.639007	0.784014	3.5e-11	0.0718204	0.122624	0.55808	1.07446	0	0	0
cg27480819	0.0539267	0.681121	0.607958	0.763088	3.51e-11	-0.162341	0.121928	0.18304	0.850151	1	0	0
cg07233933	0.0579775	0.699641	0.629467	0.777639	3.51e-11	-0.0136351	0.131969	0.917708	0.986457	1	0	0
cg03916277	0.0547843	0.69577	0.624932	0.774636	3.56e-11	-0.186792	0.128637	0.146479	0.829617	1	0	0
cg04998379	0.059019	0.67655	0.602647	0.759516	3.57e-11	-0.18855	0.127867	0.140326	0.828159	1	0	0
cg26316082	0.032332	1.23869	1.16263	1.31972	3.58e-11	-0.477238	0.242717	0.0492723	0.620495	0	1	0
cg01889461	0.0558129	0.691102	0.61949	0.770993	3.6e-11	-0.0141194	0.123755	0.909166	0.98598	1	0	0
cg27421298	0.0527671	1.41792	1.27861	1.57242	3.65e-11	0.0905149	0.127319	0.477129	1.09474	1	0	0
cg23985077	0.0553385	0.693514	0.622231	0.772965	3.75e-11	-0.0526954	0.11773	0.654444	0.948669	1	0	0
cg25744579	0.0534696	0.702144	0.632285	0.779722	3.76e-11	0.0287631	0.125461	0.818668	1.02918	0	0	0
cg02176725	0.0509969	0.713889	0.645985	0.788932	3.88e-11	-0.11557	0.119189	0.33223	0.890858	1	0	0
cg08528616	0.0575699	0.683573	0.610634	0.765223	3.9e-11	-0.223746	0.123469	0.0699614	0.799518	1	0	0
cg27228712	0.0616873	0.665409	0.589631	0.750926	4.02e-11	-0.0515016	0.126703	0.684392	0.949802	1	0	0
cg21799206	0.037398	1.28003	1.18957	1.37738	4.07e-11	-0.138186	0.149163	0.354234	0.870937	0	0	0
cg21544805	0.0594208	0.675674	0.601392	0.75913	4.17e-11	-0.0716402	0.117438	0.541844	0.930866	1	0	0
cg00765686	0.0762583	0.604674	0.520727	0.702154	4.2e-11	-0.13884	0.135557	0.30573	0.870367	1	0	0
cg22400420	0.0625956	0.661711	0.585311	0.748083	4.2e-11	0.0130534	0.12338	0.915742	1.01314	0	0	0
cg06727093	0.0654039	0.649665	0.571502	0.738518	4.27e-11	-0.273396	0.131239	0.0372333	0.760791	1	1	1
cg14724298	0.0570734	0.686516	0.613861	0.767771	4.39e-11	-0.211606	0.121586	0.0817913	0.809283	1	0	0
cg13633659	0.0587419	0.679192	0.605329	0.762068	4.53e-11	-0.101958	0.121599	0.401764	0.903068	1	0	0
cg24540678	0.0867258	0.564898	0.476594	0.669563	4.54e-11	-0.194686	0.137549	0.156953	0.823093	1	0	0
cg09614626	0.0509151	0.715134	0.647215	0.790181	4.54e-11	-0.0370142	0.121299	0.760253	0.963662	1	0	0
cg02417427	0.0614445	0.667231	0.591527	0.752624	4.55e-11	-0.0418849	0.118905	0.724646	0.95898	1	0	0
cg06894612	0.0565619	0.689079	0.616771	0.769865	4.58e-11	-0.31203	0.113111	0.00580485	0.73196	1	1	1
cg14577406	0.0577147	0.683912	0.610764	0.76582	4.62e-11	-0.133266	0.126813	0.293312	0.875232	1	0	0
cg01671895	0.0543973	1.43029	1.28565	1.59121	4.74e-11	0.196681	0.129342	0.128353	1.21736	1	0	0
cg16730484	0.0546192	0.698221	0.627337	0.777114	4.81e-11	-0.176616	0.118587	0.136399	0.838101	1	0	0
cg18998543	0.0568628	0.68811	0.61554	0.769236	4.9e-11	-0.0780506	0.120829	0.518306	0.924918	1	0	0
cg27615067	0.0477855	0.730583	0.665265	0.802315	5.06e-11	-0.162303	0.112134	0.147785	0.850184	1	0	0
cg24501381	0.0601424	0.673636	0.598731	0.757911	5.07e-11	-0.139949	0.122643	0.253823	0.869403	1	0	0
cg01424997	0.0586031	0.68054	0.606695	0.763372	5.12e-11	-0.130954	0.117964	0.266948	0.877258	1	0	0
cg17449026	0.0462992	0.737912	0.673899	0.808006	5.22e-11	-0.00563477	0.127361	0.964711	0.994381	1	0	0
cg24495017	0.0707887	0.628361	0.546958	0.721879	5.25e-11	-0.0550613	0.126082	0.662321	0.946427	1	0	0
cg01945840	0.0374278	0.782209	0.726883	0.841747	5.28e-11	-0.247399	0.107865	0.0218136	0.780829	1	1	1
cg10658666	0.0828734	0.580515	0.493482	0.682897	5.3e-11	-0.110741	0.130475	0.39602	0.895171	1	0	0
cg07205203	0.0578572	0.684182	0.610834	0.766337	5.39e-11	-0.0849118	0.1271	0.504088	0.918593	1	0	0
cg14552106	0.0547418	1.43198	1.2863	1.59417	5.41e-11	0.244475	0.126565	0.053406	1.27695	1	0	0
cg18674234	0.0567823	0.689232	0.61664	0.770368	5.58e-11	-0.189155	0.122479	0.122493	0.827658	1	0	0
cg14014879	0.0641245	0.656906	0.579323	0.74488	5.64e-11	-0.195591	0.124875	0.117281	0.822349	1	0	0
cg03171659	0.0581613	0.683155	0.609555	0.765643	5.7e-11	-0.17865	0.115857	0.123075	0.836399	1	0	0
cg03711457	0.0826961	0.581844	0.494784	0.684223	5.8e-11	-0.319458	0.137305	0.0199847	0.726543	1	1	1
cg18726664	0.0496612	0.722395	0.655394	0.796244	5.83e-11	-0.139324	0.117627	0.236231	0.869946	1	0	0
cg18790856	0.0634614	0.660004	0.582811	0.74742	5.85e-11	-0.237098	0.128896	0.0658485	0.788914	1	0	0
cg08648499	0.0559303	0.693424	0.621428	0.773761	5.91e-11	0.0661994	0.125132	0.596779	1.06844	0	0	0
cg19576422	0.0577501	0.685229	0.611898	0.767349	5.93e-11	-0.126697	0.112241	0.258986	0.881001	1	0	0
cg22190114	0.0559394	0.693513	0.621497	0.773874	6.05e-11	-0.172453	0.117357	0.141705	0.841597	1	0	0
cg03070187	0.0637715	0.658953	0.58153	0.746684	6.13e-11	-0.411926	0.13306	0.00196285	0.662373	1	1	1
cg20555854	0.0573907	0.687045	0.613951	0.76884	6.14e-11	-0.0758999	0.119236	0.524418	0.926909	1	0	0
cg13212435	0.0524515	0.709616	0.640289	0.786448	6.15e-11	-0.188762	0.128829	0.142862	0.827983	1	0	0
cg00431602	0.0640249	0.657938	0.580346	0.745904	6.2e-11	0.18317	0.123779	0.13892	1.20102	0	0	0
cg22499297	0.077623	0.601992	0.517033	0.700912	6.23e-11	-0.033403	0.11907	0.779068	0.967149	1	0	0
cg09131339	0.0694158	0.635274	0.554465	0.72786	6.32e-11	0.0918091	0.127437	0.471261	1.09616	0	0	0
cg24388251	0.0518236	0.712712	0.643876	0.788909	6.35e-11	-0.0247729	0.122569	0.839828	0.975531	1	0	0
cg10313368	0.0597641	0.676676	0.601879	0.760768	6.36e-11	-0.0680117	0.125228	0.587059	0.93425	1	0	0
cg15563355	0.0557081	0.694886	0.623009	0.775055	6.4e-11	-0.212443	0.114333	0.0631539	0.808606	1	0	0
cg22150051	0.0524091	0.71005	0.640735	0.786864	6.42e-11	0.208939	0.131773	0.112832	1.23237	0	0	0
cg22557091	0.0621437	1.50066	1.32857	1.69503	6.5e-11	0.356047	0.141241	0.0117074	1.42767	1	1	1
cg03441945	0.0590761	0.679936	0.605595	0.763403	6.58e-11	-0.0836422	0.112351	0.456591	0.91976	1	0	0
cg26714425	0.0596471	0.677421	0.60268	0.761431	6.6e-11	-0.32228	0.128101	0.0118754	0.724495	1	1	1
cg11875459	0.0543146	0.701424	0.630591	0.780214	6.6e-11	0.0436332	0.124194	0.725341	1.0446	0	0	0
cg04303901	0.0456505	0.742283	0.678753	0.81176	6.65e-11	-0.0141021	0.123182	0.908856	0.985997	1	0	0
cg07949060	0.0532601	0.706371	0.636352	0.784093	6.72e-11	-0.04895	0.132736	0.712293	0.952229	1	0	0
cg02106534	0.0599755	0.676163	0.601174	0.760506	6.81e-11	-0.25086	0.129995	0.0536356	0.778131	1	0	0
cg00112238	0.0603797	0.67442	0.599149	0.759147	6.86e-11	-0.358836	0.124644	0.0039907	0.698489	1	1	1
cg26133217	0.0670606	0.645941	0.566383	0.736673	7.16e-11	0.0485855	0.11971	0.684846	1.04979	0	0	0
cg05069835	0.0637171	0.660287	0.582769	0.748116	7.3e-11	-0.0596823	0.127943	0.640875	0.942064	1	0	0
cg21616785	0.0647333	0.655969	0.577806	0.744705	7.34e-11	-0.191374	0.122262	0.117517	0.825824	1	0	0
cg11755367	0.0611899	0.671439	0.595554	0.756992	7.53e-11	-0.129794	0.123414	0.292941	0.878276	1	0	0
cg06108459	0.0628529	0.664217	0.587231	0.751295	7.54e-11	-0.255731	0.132549	0.0536888	0.77435	1	0	0
cg07915434	0.0592461	1.47052	1.30931	1.65159	7.58e-11	0.125728	0.126076	0.318649	1.13397	1	0	0
cg19115941	0.0440113	1.33155	1.2215	1.45151	7.71e-11	-0.0136647	0.123624	0.911985	0.986428	0	0	0
cg05260077	0.0576961	0.687356	0.613862	0.769649	8.14e-11	-0.0590405	0.117951	0.616686	0.942669	1	0	0
cg15003812	0.0542778	0.702866	0.631933	0.781761	8.25e-11	-0.113798	0.12061	0.345412	0.892438	1	0	0
cg03070194	0.0519483	1.40134	1.26569	1.55154	8.28e-11	-0.110423	0.141145	0.434015	0.895455	0	0	0
cg18391323	0.0627946	1.50358	1.32946	1.70051	8.3e-11	0.0614985	0.136296	0.651837	1.06343	1	0	0
cg13505631	0.0608184	0.673694	0.597991	0.758982	8.34e-11	-0.224003	0.122186	0.0667596	0.799313	1	0	0
cg00190545	0.0558338	0.695895	0.62376	0.776371	8.39e-11	0.103955	0.123289	0.399127	1.10955	0	0	0
cg12098441	0.0715818	0.628322	0.546075	0.722958	8.48e-11	0.0631224	0.124462	0.612042	1.06516	0	0	0
cg16202419	0.0411913	0.765432	0.706065	0.829792	8.61e-11	0.120571	0.12486	0.334217	1.12814	0	0	0
cg10087754	0.0629814	0.664538	0.587367	0.751847	8.66e-11	-0.189985	0.124375	0.126635	0.826972	1	0	0
cg06963182	0.0688683	0.63971	0.558937	0.732157	8.76e-11	0.0712407	0.122676	0.561429	1.07384	0	0	0
cg10852861	0.0592195	1.46803	1.30716	1.64871	8.99e-11	0.0411034	0.124394	0.741076	1.04196	1	0	0
cg17641904	0.0559926	1.43762	1.2882	1.60438	9e-11	-0.038948	0.138313	0.778256	0.961801	0	0	0
cg04211309	0.0587759	0.683164	0.608828	0.766576	9.02e-11	-0.0292337	0.120545	0.808383	0.971189	1	0	0
cg02578560	0.0390248	1.28782	1.19299	1.39019	9.06e-11	-0.103103	0.131639	0.433492	0.902034	0	0	0
cg02953397	0.0430561	0.756553	0.695328	0.823168	9.2e-11	-0.336868	0.14551	0.0206082	0.714003	1	1	1
cg09732036	0.0551516	0.699529	0.627857	0.779383	9.21e-11	0.0804073	0.123137	0.513761	1.08373	0	0	0
cg26912636	0.0672704	0.646713	0.566828	0.737857	9.23e-11	-0.118043	0.130427	0.365438	0.888657	1	0	0
cg03885119	0.0504043	0.721494	0.653625	0.79641	9.4e-11	0.0799952	0.127038	0.528895	1.08328	0	0	0
cg23106115	0.0622663	0.668158	0.591396	0.754884	9.42e-11	-0.239011	0.124894	0.0556564	0.787406	1	0	0
cg08565632	0.0472119	0.736712	0.6716	0.808136	9.67e-11	-0.052251	0.114541	0.648264	0.949091	1	0	0
cg00795416	0.0527404	0.710975	0.641153	0.788401	9.94e-11	-0.0447654	0.122867	0.715605	0.956222	1	0	0
cg02557652	0.0610434	0.686433	0.612421	0.769389	1.02e-10	-0.17693	0.120453	0.141866	0.837838	1	0	0
cg05277122	0.0582092	0.673932	0.597938	0.759585	1.02e-10	-0.0193709	0.117571	0.869134	0.980816	1	0	0
cg13534791	0.0602861	0.677445	0.601947	0.762412	1.05e-10	-0.216597	0.120112	0.0713435	0.805255	1	0	0
cg08316983	0.0407528	0.768578	0.709576	0.832485	1.06e-10	-0.13504	0.112028	0.228046	0.873681	1	0	0
cg10334976	0.0572961	0.690723	0.617353	0.772813	1.06e-10	-0.0409346	0.122543	0.738348	0.959892	1	0	0
cg07234865	0.0571483	1.44634	1.29308	1.61776	1.06e-10	-0.0565754	0.129161	0.661371	0.944995	0	0	0
cg18651578	0.0646995	0.712215	0.642478	0.789521	1.08e-10	-0.273332	0.122702	0.0259066	0.76084	1	1	1
cg17574739	0.0525757	1.51846	1.33762	1.72376	1.08e-10	-0.013133	0.130252	0.919688	0.986953	0	0	0
cg10979436	0.0498172	1.4376	1.28755	1.60514	1.09e-10	0.154684	0.126895	0.222847	1.16729	1	0	0
cg00506168	0.0562435	1.37923	1.25093	1.52069	1.09e-10	-0.0019107	0.122929	0.987599	0.998091	0	0	0
cg06820822	0.0500526	0.724071	0.656411	0.798704	1.11e-10	-0.052802	0.124484	0.671445	0.948568	1	0	0
cg17719360	0.0466022	0.740386	0.675756	0.811196	1.12e-10	-0.140556	0.119998	0.241469	0.868875	1	0	0
cg05049825	0.047695	0.735246	0.669629	0.807292	1.13e-10	-0.0689378	0.12103	0.568955	0.933385	1	0	0
cg04166238	0.0580135	0.727977	0.660995	0.801746	1.14e-10	-0.253803	0.109868	0.0208837	0.775845	1	1	1
cg13249833	0.0492473	0.687963	0.614022	0.770808	1.14e-10	0.0700459	0.123577	0.570836	1.07256	0	0	0
cg25181170	0.0618729	0.671105	0.594463	0.75763	1.15e-10	-0.542915	0.139195	9.6e-05	0.581052	1	1	1
cg09111718	0.0496735	0.726106	0.658746	0.800354	1.17e-10	-0.196171	0.114618	0.0869845	0.821872	1	0	0
cg17070073	0.0565941	0.677966	0.602349	0.763075	1.18e-10	-0.135392	0.121761	0.26616	0.873373	1	0	0
cg20486551	0.0603379	0.694484	0.621569	0.775953	1.18e-10	0.0671149	0.137855	0.626363	1.06942	0	0	0
cg04568492	0.0577412	1.45052	1.29531	1.62432	1.19e-10	0.0846038	0.130478	0.516718	1.08829	1	0	0
cg04457572	0.0579275	0.68867	0.614756	0.77147	1.2e-10	-0.0399669	0.127842	0.754564	0.960821	1	0	0
cg07756434	0.0566652	0.694347	0.62136	0.775908	1.21e-10	-0.218224	0.120545	0.0702473	0.803945	1	0	0
cg25972943	0.054649	0.703549	0.632087	0.78309	1.24e-10	0.0898137	0.119268	0.451424	1.09397	0	0	0
cg11236727	0.0706769	1.57549	1.37168	1.80957	1.26e-10	0.0993211	0.124305	0.424286	1.10442	1	0	0
cg24520479	0.0577054	0.689961	0.616178	0.77258	1.27e-10	0.188996	0.137563	0.169478	1.20804	0	0	0
cg02863179	0.0773865	0.608005	0.522439	0.707585	1.28e-10	-0.0527286	0.131005	0.687322	0.948637	1	0	0
cg25221919	0.063164	0.666288	0.588704	0.754097	1.29e-10	-0.192373	0.121066	0.112062	0.824999	1	0	0
cg03538480	0.0536226	0.708557	0.637869	0.78708	1.32e-10	-0.178108	0.119617	0.136491	0.836852	1	0	0
cg13180252	0.0559155	0.698234	0.625757	0.779106	1.33e-10	0.00251796	0.12611	0.98407	1.00252	0	0	0
cg06763568	0.0558939	0.692504	0.61903	0.774698	1.35e-10	-0.0918257	0.121005	0.447935	0.912264	1	0	0
cg18729787	0.0572252	0.698433	0.625962	0.779295	1.35e-10	-0.0465604	0.119406	0.696586	0.954507	1	0	0
cg00350158	0.0527235	0.712917	0.642926	0.790529	1.38e-10	-0.0640354	0.117644	0.586224	0.937972	1	0	0
cg19425513	0.0750051	0.617939	0.533459	0.715797	1.38e-10	0.0938805	0.121605	0.440107	1.09843	0	0	0
cg12925881	0.0474518	0.678051	0.602182	0.763479	1.39e-10	-0.153219	0.122349	0.210457	0.857942	1	0	0
cg16781484	0.0605432	0.737477	0.671981	0.809355	1.39e-10	-0.0528058	0.116876	0.651404	0.948564	1	0	0
cg09835278	0.0570488	0.693448	0.620089	0.775486	1.39e-10	-0.0317519	0.127593	0.803475	0.968747	1	0	0
cg14432910	0.0697136	1.56406	1.36431	1.79305	1.4e-10	0.0414161	0.129909	0.749872	1.04229	1	0	0
cg10429573	0.054762	0.70379	0.632164	0.783532	1.41e-10	0.0340509	0.119126	0.775	1.03464	0	0	0
cg04658856	0.0519522	0.716642	0.647263	0.793459	1.43e-10	-0.18119	0.114818	0.114551	0.834277	1	0	0
cg00808969	0.053966	1.4131	1.27127	1.57075	1.48e-10	0.0618135	0.126321	0.624603	1.06376	1	0	0
cg08764914	0.0582297	0.646518	0.565744	0.738825	1.5e-10	-0.0823551	0.124199	0.507273	0.920945	1	0	0
cg14331720	0.0680929	0.688675	0.614397	0.771933	1.5e-10	-0.0350017	0.120747	0.77191	0.965604	1	0	0
cg20820107	0.0801412	0.598537	0.511534	0.700338	1.51e-10	-0.0485082	0.133988	0.717326	0.95265	1	0	0
cg14707006	0.061492	1.48256	1.31422	1.67245	1.52e-10	0.331093	0.129963	0.0108472	1.39249	1	1	1
cg20954533	0.0836245	0.585487	0.496977	0.689762	1.54e-10	-0.109959	0.127055	0.386799	0.895871	1	0	0
cg23411150	0.0648926	0.660135	0.581295	0.749669	1.55e-10	-0.211365	0.130156	0.10439	0.809478	1	0	0
cg11895596	0.063283	0.675437	0.598941	0.761703	1.57e-10	-0.596204	0.123884	1.49e-06	0.550899	1	1	1
cg22344841	0.0613261	0.667021	0.589214	0.755103	1.57e-10	-0.224325	0.126232	0.075554	0.799056	1	0	0
cg04667538	0.0511698	0.672424	0.595375	0.759445	1.64e-10	-0.201443	0.122834	0.101012	0.81755	1	0	0
cg00132769	0.0620921	0.721042	0.652236	0.797107	1.64e-10	-0.0828541	0.11813	0.483064	0.920485	1	0	0
cg07941927	0.063847	1.50363	1.32677	1.70407	1.68e-10	0.211898	0.137975	0.124594	1.23602	1	0	0
cg01532075	0.0553558	0.702186	0.62999	0.782657	1.69e-10	-0.191062	0.117933	0.105212	0.826081	1	0	0
cg23501439	0.053032	0.712729	0.642367	0.790797	1.7e-10	-0.00412633	0.122152	0.973052	0.995882	1	0	0
cg19098710	0.0631739	1.46971	1.30584	1.65413	1.72e-10	0.00596038	0.134132	0.964556	1.00598	1	0	0
cg08142172	0.0462761	1.48652	1.31617	1.67891	1.72e-10	-0.214147	0.128713	0.09616	0.807229	0	0	0
cg08284443	0.0603137	0.744202	0.679674	0.814857	1.72e-10	0.0518947	0.123084	0.673302	1.05326	0	0	0
cg19656820	0.0620978	0.668094	0.590288	0.756156	1.72e-10	0.0280597	0.118394	0.812654	1.02846	0	0	0
cg04875062	0.0630821	0.66852	0.590771	0.756502	1.73e-10	-0.161414	0.121561	0.184227	0.850939	1	0	0
cg27060355	0.0481168	0.735583	0.669383	0.808331	1.75e-10	0.0345479	0.124515	0.781426	1.03515	0	0	0
cg20232503	0.0579168	0.691039	0.616884	0.774108	1.76e-10	-0.329878	0.122421	0.00704711	0.719011	1	1	1
cg00196407	0.0686657	0.645353	0.564091	0.738322	1.79e-10	-0.371876	0.130707	0.00443963	0.689439	1	1	1
cg04399789	0.059492	0.684338	0.60902	0.768972	1.82e-10	-0.184188	0.114118	0.106523	0.831779	1	0	0
cg20864326	0.0515681	0.719845	0.650645	0.796404	1.84e-10	-0.141686	0.118133	0.230385	0.867894	1	0	0
cg10832107	0.0539506	0.709005	0.637862	0.788083	1.84e-10	-0.12424	0.122665	0.311136	0.883168	1	0	0
cg03604892	0.0561043	1.42982	1.28093	1.59602	1.85e-10	-0.0497663	0.128725	0.699045	0.951452	0	0	0
cg02085507	0.066419	0.654912	0.574973	0.745966	1.86e-10	-0.498115	0.144218	0.000552526	0.607675	1	1	1
cg12582654	0.0616161	1.4805	1.31208	1.67054	1.91e-10	0.166016	0.13413	0.21582	1.18059	1	0	0
cg10537193	0.0452577	1.33391	1.22069	1.45764	1.94e-10	-0.030221	0.126224	0.810777	0.970231	0	0	0
cg23414595	0.0665011	0.63852	0.556109	0.733143	1.98e-10	-0.281727	0.128425	0.0282566	0.75448	1	1	1
cg11940177	0.0705055	0.654991	0.574949	0.746176	1.98e-10	-0.0200082	0.126736	0.874557	0.980191	1	0	0
cg09120609	0.0548932	0.705207	0.633274	0.785311	1.98e-10	0.0900925	0.123827	0.466878	1.09428	0	0	0
cg11911951	0.0565443	0.708038	0.636576	0.787522	2.01e-10	-0.101992	0.11344	0.368608	0.903037	1	0	0
cg07382687	0.0542834	0.697907	0.624693	0.779701	2.01e-10	0.0244128	0.124753	0.844854	1.02471	0	0	0
cg09469554	0.0646541	1.50857	1.32902	1.71238	2.02e-10	0.154066	0.126897	0.224708	1.16657	1	0	0
cg16102052	0.0629752	0.670177	0.592359	0.758218	2.08e-10	-0.282814	0.119322	0.0177791	0.75366	1	1	1
cg13811168	0.0590577	0.687144	0.612037	0.771468	2.11e-10	-0.229217	0.117403	0.0508911	0.795156	1	0	0
cg08606951	0.0576064	0.693514	0.619471	0.776408	2.11e-10	-0.11244	0.121492	0.354712	0.893651	1	0	0
cg05541542	0.0552863	0.703846	0.631565	0.7844	2.12e-10	-0.149175	0.113925	0.190395	0.861419	1	0	0
cg22166739	0.0792679	0.604467	0.517487	0.706066	2.14e-10	-0.0754077	0.128904	0.558553	0.927365	1	0	0
cg19710916	0.0507883	0.724393	0.655757	0.800212	2.18e-10	-0.0560965	0.136004	0.68	0.945448	1	0	0
cg07151197	0.0597334	0.684525	0.608898	0.769546	2.22e-10	0.0407879	0.129682	0.753125	1.04163	0	0	0
cg06318796	0.0597747	0.684412	0.608747	0.769481	2.24e-10	-0.154363	0.119203	0.195336	0.856961	1	0	0
cg21534940	0.0630747	0.670238	0.592298	0.758435	2.24e-10	-0.00608802	0.124285	0.960932	0.99393	1	0	0
cg17444409	0.0559508	0.70123	0.628398	0.782503	2.25e-10	-0.0669678	0.131408	0.61032	0.935225	1	0	0
cg08354751	0.0796428	0.60341	0.516203	0.70535	2.26e-10	-0.133008	0.128557	0.300846	0.875458	1	0	0
cg18261069	0.0748383	0.622131	0.537253	0.720417	2.27e-10	-0.0826806	0.129122	0.521959	0.920645	1	0	0
cg04834204	0.0639509	0.666651	0.588117	0.755673	2.29e-10	-0.230037	0.126033	0.067969	0.794504	1	0	0
cg24333469	0.0582204	1.44633	1.29036	1.62116	2.32e-10	0.170858	0.135796	0.208322	1.18632	1	0	0
cg01868869	0.0579762	0.692531	0.618144	0.77587	2.34e-10	-0.25989	0.125753	0.0387655	0.771137	1	1	1
cg19990151	0.0545649	0.707673	0.635897	0.78755	2.34e-10	-0.0950131	0.129668	0.463716	0.909361	1	0	0
cg21320567	0.0606778	0.680846	0.604504	0.766827	2.37e-10	-0.162275	0.120388	0.177681	0.850207	1	0	0
cg21761356	0.0431005	0.761056	0.699406	0.82814	2.37e-10	-0.0149523	0.122216	0.902628	0.985159	1	0	0
cg05418508	0.0504732	0.726364	0.657948	0.801895	2.39e-10	0.0731029	0.129662	0.572892	1.07584	0	0	0
cg26649321	0.0476067	0.739719	0.67382	0.812062	2.41e-10	-0.116971	0.120893	0.333262	0.889611	1	0	0
cg24565274	0.0570333	1.43501	1.28324	1.60473	2.41e-10	-0.232411	0.125336	0.0636955	0.792621	0	0	0
cg15901647	0.055492	0.703799	0.631268	0.784663	2.45e-10	-0.148122	0.118106	0.20979	0.862326	1	0	0
cg23968383	0.0568064	0.698033	0.624486	0.780243	2.48e-10	-0.355768	0.127886	0.00540385	0.700635	1	1	1
cg14006649	0.0558065	0.702482	0.629699	0.783679	2.49e-10	-0.267925	0.133675	0.0450387	0.764965	1	1	1
cg10305797	0.0579739	0.692917	0.618492	0.776299	2.49e-10	-0.0670396	0.126184	0.59522	0.935158	1	0	0
cg16461134	0.0532576	0.713929	0.643165	0.79248	2.5e-10	-0.0927167	0.116083	0.42446	0.911452	1	0	0
cg23971226	0.0541107	0.710121	0.638665	0.789571	2.51e-10	-0.155282	0.12122	0.200195	0.856174	1	0	0
cg03257575	0.0630118	1.48953	1.31648	1.68533	2.55e-10	-0.0367254	0.137253	0.789027	0.963941	0	0	0
cg06240200	0.0670545	0.654426	0.573831	0.746341	2.56e-10	-0.196839	0.129132	0.127428	0.821323	1	0	0
cg22996009	0.0577325	0.694183	0.619914	0.777348	2.57e-10	-0.287214	0.127738	0.0245473	0.750351	1	1	1
cg25817111	0.0468874	0.668188	0.589661	0.757172	2.6e-10	-0.157865	0.135396	0.243635	0.853965	1	0	0
cg14484045	0.0637877	0.743502	0.678222	0.815066	2.6e-10	-0.0848948	0.114472	0.458317	0.918609	1	0	0
cg08489674	0.0677506	1.53449	1.34368	1.7524	2.61e-10	0.121641	0.126293	0.335465	1.12935	1	0	0
cg26245202	0.0473243	0.741494	0.67581	0.813561	2.62e-10	-0.219571	0.107769	0.0416074	0.802863	1	1	1
cg22489510	0.0679774	0.650834	0.56965	0.743589	2.64e-10	-0.0586274	0.130071	0.652182	0.943058	1	0	0
cg10567810	0.0573738	1.43692	1.28409	1.60793	2.65e-10	0.0515837	0.131729	0.695362	1.05294	1	0	0
cg02049833	0.0549751	0.706607	0.634429	0.786997	2.67e-10	-0.12708	0.12209	0.297937	0.880663	1	0	0
cg26535158	0.0543446	0.70947	0.637788	0.78921	2.69e-10	-0.093483	0.119589	0.434391	0.910753	1	0	0
cg10800346	0.0630153	0.671707	0.593665	0.760009	2.7e-10	-0.237931	0.123794	0.0546073	0.788257	1	0	0
cg09935989	0.0605228	0.682404	0.606072	0.768349	2.72e-10	-0.256099	0.121262	0.0346911	0.774066	1	1	1
cg25590826	0.0711753	0.638035	0.554958	0.733549	2.73e-10	-0.214547	0.137255	0.118022	0.806907	1	0	0
cg23063243	0.0527211	1.39482	1.25789	1.54666	2.76e-10	0.206325	0.125823	0.101045	1.22915	1	0	0
cg21686171	0.0546745	0.708165	0.636202	0.788267	2.76e-10	-0.0491067	0.120752	0.684246	0.95208	1	0	0
cg01832218	0.0537826	0.712172	0.640922	0.791343	2.77e-10	-0.212845	0.123886	0.085785	0.808282	1	0	0
cg15841533	0.0537389	0.712426	0.641206	0.791558	2.79e-10	-0.19388	0.126282	0.124713	0.823757	1	0	0
cg24641276	0.0545091	1.4104	1.26749	1.56943	2.82e-10	0.0751276	0.12288	0.540941	1.07802	1	0	0
cg06402816	0.0508206	1.37791	1.24727	1.52223	2.83e-10	0.0567499	0.13307	0.669767	1.05839	1	0	0
cg13966575	0.0586585	0.69075	0.615731	0.77491	2.84e-10	-0.303798	0.12704	0.0167863	0.73801	1	1	1
cg20603106	0.06125	0.679798	0.602898	0.766507	2.95e-10	-0.130418	0.122338	0.286402	0.877729	1	0	0
cg08564874	0.0623302	0.675237	0.597587	0.762978	2.97e-10	0.0834452	0.122418	0.495465	1.08703	0	0	0
cg01193769	0.0548678	1.41267	1.26863	1.57305	3.04e-10	0.189551	0.131871	0.150605	1.20871	1	0	0
cg19893750	0.0569125	0.698863	0.625097	0.781332	3.06e-10	-0.275424	0.115185	0.016796	0.75925	1	1	1
cg07456201	0.0521261	0.723873	0.654572	0.800511	3.1e-10	-0.181357	0.114932	0.114579	0.834138	1	0	0
cg08210688	0.0898123	0.568221	0.476506	0.677588	3.1e-10	-0.183941	0.14149	0.193591	0.831985	1	0	0
cg01368068	0.0513449	0.720307	0.650351	0.797788	3.1e-10	0.0961816	0.127145	0.449367	1.10096	0	0	0
cg18276112	0.0599135	0.686025	0.610016	0.771504	3.18e-10	-0.0577291	0.120122	0.63081	0.943906	1	0	0
cg23150604	0.0593107	0.688678	0.613099	0.773573	3.2e-10	-0.40213	0.127183	0.00156788	0.668894	1	1	1
cg08370839	0.0752688	0.696953	0.622774	0.779967	3.21e-10	-0.113547	0.133213	0.394009	0.892663	1	0	0
cg02709068	0.0574165	0.622941	0.5375	0.721965	3.21e-10	-0.0805981	0.133809	0.54695	0.922564	1	0	0
cg08026930	0.063377	0.671329	0.59291	0.760119	3.22e-10	-0.189223	0.118209	0.109432	0.827602	1	0	0
cg02912316	0.0604315	0.683892	0.607503	0.769887	3.23e-10	-0.0738157	0.117033	0.52822	0.928843	1	0	0
cg02311932	0.0610158	1.46759	1.30217	1.65402	3.23e-10	0.0793587	0.125833	0.528258	1.08259	1	0	0
cg01554089	0.0533964	0.714917	0.64388	0.793793	3.28e-10	-0.0935906	0.127961	0.464536	0.910656	1	0	0
cg19517912	0.0561853	0.702558	0.629299	0.784345	3.32e-10	0.000153996	0.122742	0.998999	1.00015	0	0	0
cg04341343	0.0592551	0.689247	0.613673	0.774128	3.37e-10	-0.132535	0.121169	0.274042	0.875873	1	0	0
cg09169953	0.0618241	1.47445	1.30618	1.66438	3.38e-10	0.215212	0.133731	0.107553	1.24013	1	0	0
cg05586667	0.0602101	0.687645	0.611798	0.772894	3.38e-10	-0.170968	0.121789	0.160379	0.842849	1	0	0
cg14044120	0.0596284	0.685135	0.608871	0.770952	3.38e-10	-0.127043	0.124627	0.308021	0.880696	1	0	0
cg27116912	0.0584897	1.41568	1.27007	1.57798	3.45e-10	0.056238	0.126871	0.657571	1.05785	1	0	0
cg17146918	0.055378	0.692703	0.617676	0.776844	3.45e-10	-0.0277101	0.117316	0.813276	0.97267	1	0	0
cg19061112	0.062067	0.677435	0.599841	0.765066	3.51e-10	0.254239	0.13403	0.0578445	1.28948	0	0	0
cg22920417	0.0707922	0.641352	0.558262	0.736809	3.51e-10	0.165068	0.109103	0.130292	1.17947	0	0	0
cg15440661	0.0555419	0.705773	0.632977	0.786942	3.52e-10	-0.322465	0.130266	0.0133075	0.724361	1	1	1
cg05514136	0.0547532	0.709291	0.637116	0.789642	3.53e-10	0.061175	0.117821	0.603609	1.06308	0	0	0
cg13289827	0.0600021	0.686341	0.610192	0.771994	3.55e-10	-0.000398604	0.126344	0.997483	0.999601	1	0	0
cg20297053	0.0554112	0.706482	0.633775	0.78753	3.6e-10	-0.106354	0.129319	0.410842	0.899106	1	0	0
cg18126802	0.0626548	0.675158	0.597136	0.763374	3.62e-10	-0.233653	0.121159	0.0537959	0.791637	1	0	0
cg06587155	0.0568705	1.42825	1.27761	1.59666	3.66e-10	0.222989	0.128048	0.0816056	1.24981	1	0	0
cg07919131	0.0484338	1.35457	1.23189	1.48945	3.71e-10	-0.123549	0.139831	0.376934	0.883778	0	0	0
cg10812247	0.0623112	0.676824	0.599013	0.764742	3.74e-10	-0.30565	0.123808	0.013559	0.736645	1	1	1
cg19900558	0.056699	0.701087	0.627349	0.783491	3.77e-10	-0.162639	0.117927	0.167848	0.849898	1	0	0
cg05467458	0.0552603	0.707457	0.634837	0.788383	3.78e-10	-0.317162	0.122212	0.00945434	0.728213	1	1	1
cg06340161	0.0537543	0.714162	0.642749	0.79351	3.78e-10	-0.0623311	0.127952	0.626155	0.939572	1	0	0
cg09032314	0.065927	0.661841	0.581616	0.753132	3.84e-10	-0.0465648	0.125653	0.710949	0.954503	1	0	0
cg01792403	0.0561508	1.42113	1.27303	1.58646	3.87e-10	0.13317	0.125826	0.289889	1.14244	1	0	0
cg03360728	0.0644213	0.668234	0.58897	0.758166	3.91e-10	0.0337568	0.117905	0.774644	1.03433	0	0	0
cg08212913	0.118613	0.47614	0.377373	0.600757	3.95e-10	-0.0882644	0.124366	0.47788	0.915519	1	0	0
cg24450239	0.0623803	0.676907	0.599006	0.76494	3.96e-10	-0.308015	0.126337	0.0147669	0.734904	1	1	1
cg07949217	0.0696039	0.647052	0.564536	0.741627	3.99e-10	-0.0947895	0.126699	0.454371	0.909564	1	0	0
cg27182012	0.0559084	0.704963	0.631796	0.786603	4.02e-10	-0.294869	0.120123	0.0140994	0.744629	1	1	1
cg11956953	0.0392569	1.27823	1.18356	1.38046	4.03e-10	-0.287169	0.143882	0.0459484	0.750385	0	1	0
cg04239786	0.0549447	0.709263	0.636851	0.789907	4.05e-10	0.0488523	0.131214	0.709661	1.05007	0	0	0
cg26361535	0.053063	0.688035	0.611922	0.773616	4.07e-10	-0.299612	0.124609	0.0161987	0.741106	1	1	1
cg10416861	0.0572285	0.699245	0.625052	0.782244	4.07e-10	-0.0134755	0.123903	0.913394	0.986615	1	0	0
cg11441553	0.0554349	1.41416	1.26857	1.57647	4.07e-10	-0.102597	0.135094	0.447584	0.902491	0	0	0
cg02025737	0.0598152	0.717689	0.646799	0.79635	4.07e-10	0.0745863	0.121241	0.538429	1.07744	0	0	0
cg09854003	0.0629709	1.48226	1.31016	1.67697	4.11e-10	-0.0208818	0.130878	0.873234	0.979335	0	0	0
cg20316549	0.0625251	1.47805	1.30758	1.67074	4.13e-10	0.0228306	0.125672	0.855843	1.02309	1	0	0
cg06133110	0.0666421	0.659409	0.578668	0.751417	4.14e-10	-0.211578	0.126687	0.0949029	0.809306	1	0	0
cg07587250	0.0615001	0.680967	0.603639	0.768202	4.16e-10	-0.287281	0.122561	0.0190784	0.750301	1	1	1
cg16211704	0.0579996	0.756185	0.69269	0.825499	4.22e-10	-0.13995	0.104853	0.181966	0.869401	1	0	0
cg19921085	0.044747	0.696104	0.621305	0.779908	4.22e-10	0.0594315	0.14469	0.681255	1.06123	0	0	0
cg14957943	0.0477229	1.34718	1.22689	1.47927	4.25e-10	-0.101922	0.133393	0.444821	0.9031	0	0	0
cg26720125	0.0660523	1.5105	1.32708	1.71927	4.26e-10	-0.0389762	0.132725	0.769016	0.961774	0	0	0
cg09130077	0.0582757	1.43889	1.28358	1.61299	4.27e-10	0.306855	0.128985	0.01736	1.35914	1	1	1
cg08092111	0.0554621	0.707301	0.634446	0.788522	4.27e-10	-0.0259179	0.132196	0.844566	0.974415	1	0	0
cg19621460	0.0754879	0.624214	0.538366	0.72375	4.3e-10	-0.00341329	0.12783	0.978698	0.996593	1	0	0
cg07790170	0.0556533	1.41538	1.26912	1.57851	4.31e-10	0.268317	0.117429	0.0223172	1.30776	1	1	1
cg27593760	0.0521751	0.722087	0.651896	0.799836	4.36e-10	-0.066879	0.116264	0.565133	0.935308	1	0	0
cg09729274	0.0608332	0.684148	0.607251	0.770781	4.38e-10	-0.185267	0.121367	0.126885	0.830883	1	0	0
cg17203063	0.0612454	1.46544	1.29967	1.65234	4.38e-10	0.0652778	0.134912	0.628489	1.06746	1	0	0
cg21159128	0.0603115	0.686515	0.609976	0.772658	4.48e-10	-0.19896	0.127297	0.118062	0.819583	1	0	0
cg25221196	0.0564063	0.703552	0.629916	0.785795	4.56e-10	-0.189011	0.116107	0.103544	0.827778	1	0	0
cg07373212	0.0478984	0.741903	0.675423	0.814926	4.58e-10	-0.162796	0.110108	0.13927	0.849764	1	0	0
cg25399461	0.0539388	0.714509	0.642828	0.794182	4.6e-10	0.0144026	0.126275	0.909193	1.01451	0	0	0
cg14279035	0.0518529	0.681059	0.603559	0.76851	4.61e-10	-0.141411	0.130239	0.277576	0.868132	1	0	0
cg16514255	0.0616362	0.723871	0.653919	0.801306	4.61e-10	-0.00255759	0.117547	0.982641	0.997446	1	0	0
cg11646259	0.047245	0.744964	0.679079	0.817241	4.61e-10	0.107902	0.120733	0.371472	1.11394	0	0	0
cg23915912	0.0508147	0.728591	0.659523	0.804891	4.62e-10	0.00225132	0.119017	0.984908	1.00225	0	0	0
cg07896832	0.0618444	0.680347	0.602682	0.76802	4.73e-10	-0.21308	0.121922	0.0805202	0.808092	1	0	0
cg14011841	0.0566493	0.702813	0.628956	0.785344	4.8e-10	-0.0968479	0.119235	0.41665	0.907694	1	0	0
cg07011110	0.0554026	0.708292	0.635409	0.789534	4.81e-10	-0.227868	0.111262	0.0405573	0.796229	1	1	1
cg17720233	0.0604109	0.686646	0.609974	0.772956	4.88e-10	-0.0421931	0.131095	0.747565	0.958685	1	0	0
cg11150074	0.0548452	0.710883	0.638431	0.791558	4.91e-10	-0.252548	0.118152	0.0325581	0.776819	1	1	1
cg23512701	0.0598986	0.715921	0.644368	0.79542	4.96e-10	-0.175292	0.11913	0.141174	0.839212	1	0	0
cg08487063	0.0537256	1.45149	1.29071	1.6323	4.96e-10	0.0944036	0.126044	0.453872	1.099	1	0	0
cg13437337	0.0483451	1.35082	1.2287	1.48508	4.97e-10	0.0956708	0.125987	0.44763	1.1004	1	0	0
cg13258774	0.0556161	0.694181	0.618754	0.778803	4.98e-10	-0.227107	0.127278	0.0743685	0.796836	1	0	0
cg04800142	0.0586874	0.707568	0.634494	0.789058	4.98e-10	-0.0117688	0.123583	0.924132	0.9883	1	0	0
cg03794981	0.060206	0.687676	0.611134	0.773804	4.99e-10	-0.236089	0.114004	0.0383706	0.789711	1	1	1
cg04993279	0.0548718	0.658083	0.576748	0.750888	5.09e-10	-0.208097	0.121337	0.0863386	0.812129	1	0	0
cg15931471	0.0673103	0.710982	0.638486	0.791709	5.09e-10	-0.0641573	0.120804	0.59536	0.937857	1	0	0
cg06909503	0.0560761	0.705739	0.632284	0.787728	5.13e-10	-0.132085	0.118392	0.264568	0.876267	1	0	0
cg01165683	0.0603765	0.687233	0.610536	0.773564	5.22e-10	-0.0531159	0.119784	0.657455	0.94827	1	0	0
cg04330326	0.0683621	0.654019	0.572006	0.747791	5.25e-10	-0.165912	0.115064	0.149329	0.847121	1	0	0
cg03403168	0.0603157	0.68765	0.610979	0.773941	5.35e-10	-0.153324	0.131024	0.241922	0.857851	1	0	0
cg06757356	0.0709059	0.643931	0.560382	0.739937	5.38e-10	-0.00896369	0.126259	0.943402	0.991076	1	0	0
cg05483388	0.0612921	0.683571	0.606194	0.770825	5.41e-10	-0.178496	0.128275	0.164069	0.836527	1	0	0
cg13052887	0.0522726	0.722932	0.652533	0.800925	5.41e-10	0.0141283	0.135089	0.916705	1.01423	0	0	0
cg07761358	0.0587503	0.694501	0.618963	0.779258	5.46e-10	-0.116914	0.12225	0.338896	0.889662	1	0	0
cg23010900	0.0562322	0.705478	0.631856	0.787677	5.49e-10	-0.179843	0.130603	0.168506	0.835402	1	0	0
cg18052511	0.0682868	0.654675	0.572664	0.74843	5.52e-10	0.0788334	0.122579	0.520144	1.08202	0	0	0
cg16670497	0.0568756	1.42298	1.27288	1.59078	5.57e-10	0.0235027	0.125853	0.851859	1.02378	1	0	0
cg25565203	0.0671679	0.659314	0.577988	0.752083	5.59e-10	-0.314058	0.130609	0.0161921	0.730477	1	1	1
cg00421363	0.0539571	1.3973	1.25707	1.55316	5.64e-10	0.325972	0.125769	0.00954677	1.38538	1	1	1
cg13736068	0.0456541	1.32714	1.21354	1.45136	5.67e-10	0.189549	0.107327	0.0773804	1.2087	1	0	0
cg15702277	0.0583309	0.696586	0.621331	0.780955	5.7e-10	-0.261545	0.119985	0.0292713	0.769861	1	1	1
cg12631737	0.0354081	1.24538	1.16188	1.33488	5.74e-10	0.0443271	0.11627	0.703023	1.04532	1	0	0
cg16540590	0.061845	0.681621	0.60381	0.769459	5.74e-10	0.046817	0.123813	0.705336	1.04793	0	0	0
cg15883603	0.060301	0.688314	0.611587	0.774667	5.86e-10	-0.0711856	0.122896	0.562431	0.931289	1	0	0
cg09968461	0.051567	0.726622	0.656772	0.803901	5.91e-10	-0.0154944	0.122929	0.899697	0.984625	1	0	0
cg00009196	0.0641017	0.672379	0.592995	0.762391	5.93e-10	-0.0543757	0.123841	0.660606	0.947076	1	0	0
cg04605697	0.053194	0.719377	0.648154	0.798428	5.95e-10	-0.00285758	0.125874	0.981888	0.997147	1	0	0
cg22990871	0.0624181	0.679453	0.601214	0.767874	5.96e-10	-0.209975	0.124221	0.0909653	0.810605	1	0	0
cg10053779	0.052979	0.713211	0.640839	0.793758	5.98e-10	-0.124958	0.125083	0.317793	0.882534	1	0	0
cg17476101	0.054593	0.720366	0.649318	0.799188	5.98e-10	-0.0105471	0.12422	0.932336	0.989508	1	0	0
cg14605874	0.070463	1.54682	1.3473	1.7759	6e-10	0.101182	0.128352	0.430514	1.10648	1	0	0
cg06769994	0.0615588	1.46384	1.29746	1.65156	6.01e-10	0.237622	0.128439	0.0643031	1.26823	1	0	0
cg01528028	0.0648336	1.49376	1.31551	1.69616	6.03e-10	-0.0310616	0.131879	0.813796	0.969416	0	0	0
cg10663897	0.0658574	0.665242	0.584684	0.756898	6.05e-10	-0.238157	0.129964	0.0668789	0.788079	1	0	0
cg03974193	0.0787746	0.614133	0.526271	0.716664	6.05e-10	-0.0432312	0.131278	0.741922	0.95769	1	0	0
cg12064372	0.0624241	1.47158	1.30211	1.6631	6.06e-10	-0.141693	0.123406	0.250889	0.867887	0	0	0
cg01409887	0.0351329	1.24283	1.16013	1.33143	6.1e-10	-0.382644	0.185628	0.0392695	0.682056	0	1	0
cg06489008	0.0558676	0.707734	0.63433	0.789632	6.11e-10	0.0747984	0.119734	0.532166	1.07767	0	0	0
cg06770322	0.0551112	0.711071	0.638267	0.79218	6.12e-10	-0.405366	0.107342	0.000159123	0.666733	1	1	1
cg01584139	0.0429935	0.766453	0.704513	0.833838	6.15e-10	-0.135352	0.11909	0.255723	0.873408	1	0	0
cg14173258	0.0518822	0.72545	0.655307	0.8031	6.16e-10	-0.183739	0.11727	0.11716	0.832153	1	0	0
cg06768399	0.0600281	0.689871	0.613298	0.776004	6.23e-10	-0.358432	0.121234	0.00311114	0.698771	1	1	1
cg26826183	0.0635468	0.675037	0.595986	0.764573	6.24e-10	-0.139353	0.118941	0.241354	0.869921	1	0	0
cg17744825	0.0390349	0.785529	0.727672	0.847987	6.24e-10	0.127825	0.124251	0.30359	1.13635	0	0	0
cg22932313	0.0631747	0.676642	0.597839	0.765832	6.29e-10	-0.0116103	0.120407	0.923183	0.988457	1	0	0
cg26557744	0.0555823	0.709184	0.635985	0.790807	6.31e-10	-0.0868622	0.120243	0.470057	0.916803	1	0	0
cg22863889	0.0599278	0.6904	0.613889	0.776446	6.32e-10	-0.490344	0.139363	0.000434055	0.612416	1	1	1
cg10225408	0.0600747	0.68983	0.613206	0.776029	6.38e-10	-0.213692	0.121924	0.0796596	0.807597	1	0	0
cg24534743	0.0632766	0.676324	0.597439	0.765625	6.39e-10	-0.171903	0.115957	0.138215	0.842061	1	0	0
cg18642179	0.0596948	0.691534	0.615179	0.777367	6.46e-10	-0.103721	0.121074	0.391626	0.901477	1	0	0
cg19591696	0.0552303	0.71103	0.638081	0.792319	6.62e-10	0.0604273	0.123834	0.62557	1.06229	0	0	0
cg08784129	0.0623538	1.46955	1.3005	1.66059	6.67e-10	0.31929	0.138894	0.0215161	1.37615	1	1	1
cg27104671	0.0595585	0.692344	0.616064	0.77807	6.69e-10	-0.00273544	0.134102	0.983726	0.997268	1	0	0
cg25451249	0.0516676	1.37552	1.24305	1.52211	6.79e-10	-0.201026	0.12719	0.11399	0.817892	0	0	0
cg26631039	0.0484674	1.3486	1.22638	1.48299	6.81e-10	-0.0680505	0.136536	0.618198	0.934213	0	0	0
cg22700686	0.0701212	0.648833	0.565517	0.744423	6.87e-10	-0.265015	0.138879	0.05636	0.767194	1	0	0
cg06185555	0.050882	0.730602	0.661257	0.807219	6.88e-10	-0.0440797	0.118958	0.710973	0.956878	1	0	0
cg02870946	0.0646484	0.671119	0.591249	0.761777	6.88e-10	0.131366	0.134132	0.32739	1.14039	0	0	0
cg04601090	0.0653306	0.668408	0.588074	0.759715	6.98e-10	-0.169435	0.126212	0.179445	0.844142	1	0	0
cg19857407	0.0475485	0.706224	0.632307	0.788781	6.99e-10	-0.151405	0.115912	0.19148	0.859499	1	0	0
cg22329423	0.0564073	1.34071	1.22141	1.47166	6.99e-10	-0.044705	0.133432	0.737594	0.95628	0	0	0
cg05709598	0.0533324	0.719751	0.648315	0.79906	7e-10	-0.0795639	0.112969	0.481248	0.923519	1	0	0
cg16893634	0.0544076	0.715004	0.642683	0.795464	7.01e-10	-0.1673	0.122226	0.171069	0.845946	1	0	0
cg09055743	0.0487151	0.74056	0.673122	0.814755	7.03e-10	-0.21705	0.117033	0.0636528	0.80489	1	0	0
cg10008445	0.0624804	0.680318	0.601906	0.768945	7.05e-10	-0.142115	0.1233	0.249075	0.867521	1	0	0
cg12580445	0.0715123	0.629558	0.543417	0.729354	7.1e-10	-0.20049	0.124003	0.105918	0.81833	1	0	0
cg12427286	0.0750733	0.643527	0.559365	0.740351	7.1e-10	-0.142844	0.121484	0.239665	0.866889	1	0	0
cg26877678	0.0607352	0.687748	0.610564	0.774689	7.12e-10	-0.0820622	0.121565	0.499646	0.921215	1	0	0
cg10648670	0.0536253	1.39165	1.25281	1.54588	7.14e-10	0.12408	0.124521	0.319029	1.13211	1	0	0
cg08140609	0.0589594	0.695371	0.619485	0.780554	7.18e-10	-0.151353	0.123023	0.218591	0.859544	1	0	0
cg14233821	0.0528999	0.721869	0.650774	0.800732	7.23e-10	-0.0735298	0.128397	0.566863	0.929108	1	0	0
cg03564754	0.0549384	0.712973	0.640191	0.79403	7.37e-10	0.0290675	0.120663	0.809634	1.02949	0	0	0
cg04627863	0.0693051	0.652684	0.569784	0.747645	7.45e-10	-0.0548036	0.128297	0.669263	0.946671	1	0	0
cg14251870	0.0627356	1.47136	1.30112	1.66387	7.47e-10	0.106911	0.133756	0.424118	1.11284	1	0	0
cg25314624	0.0555633	0.710473	0.637165	0.792215	7.65e-10	-0.161204	0.118831	0.174917	0.851119	1	0	0
cg01703780	0.0661415	0.665793	0.584843	0.757948	7.74e-10	-0.0743272	0.120149	0.536164	0.928368	1	0	0
cg07902983	0.0633462	1.47634	1.30396	1.6715	7.76e-10	0.0374116	0.134208	0.78043	1.03812	1	0	0
cg02045294	0.0653503	0.669131	0.588688	0.760567	7.85e-10	-0.156428	0.130736	0.231495	0.855193	1	0	0
cg14112601	0.0735152	0.63638	0.550986	0.73501	7.85e-10	-0.00815415	0.129306	0.949718	0.991879	1	0	0
cg18479972	0.0493481	1.42355	1.27197	1.5932	7.86e-10	0.368287	0.124389	0.00306877	1.44526	1	1	1
cg04894958	0.057445	0.738319	0.670253	0.813297	7.86e-10	-0.287278	0.110491	0.00932222	0.750303	1	1	1
cg16576597	0.0536936	0.718862	0.647055	0.798637	7.87e-10	-0.0757969	0.122895	0.537392	0.927004	1	0	0
cg13557668	0.055574	1.40717	1.26195	1.5691	7.92e-10	0.214133	0.131049	0.102262	1.23879	1	0	0
cg21180467	0.0499619	0.735637	0.667016	0.811319	7.99e-10	-0.244184	0.120538	0.0427863	0.783344	1	1	1
cg02474625	0.0475813	0.746493	0.680024	0.819458	8.02e-10	-0.135152	0.113231	0.232636	0.873583	1	0	0
cg01852186	0.0649322	0.671023	0.590836	0.762092	8.04e-10	-0.133573	0.127307	0.294076	0.874964	1	0	0
cg13367169	0.0613618	1.45782	1.29262	1.64412	8.1e-10	0.0557858	0.124066	0.652966	1.05737	1	0	0
cg25004441	0.0556695	0.710375	0.636944	0.79227	8.11e-10	0.00560964	0.121471	0.963166	1.00563	0	0	0
cg09471709	0.0651063	0.670376	0.590065	0.761618	8.12e-10	-0.00471977	0.13893	0.972899	0.995291	1	0	0
cg00963378	0.0689306	1.52707	1.33409	1.74796	8.17e-10	0.089584	0.137459	0.514584	1.09372	1	0	0
cg16949584	0.0593339	0.694654	0.618392	0.780322	8.22e-10	-0.101302	0.132043	0.442967	0.90366	1	0	0
cg19729930	0.0595707	0.64478	0.56048	0.74176	8.32e-10	-0.103926	0.127167	0.413793	0.901292	1	0	0
cg15068641	0.0714892	0.693721	0.617275	0.779636	8.32e-10	-0.0731749	0.121423	0.546745	0.929438	1	0	0
cg16765268	0.061305	0.686395	0.608683	0.774028	8.35e-10	-0.149621	0.124555	0.229655	0.861034	1	0	0
cg06579354	0.0668926	0.663315	0.581809	0.756238	8.42e-10	0.164087	0.119521	0.169792	1.17832	0	0	0
cg08138685	0.0554655	1.40546	1.26068	1.56686	8.44e-10	0.123553	0.119948	0.302987	1.13151	1	0	0
cg16326590	0.0615788	0.685332	0.607415	0.773245	8.46e-10	-0.182139	0.1153	0.114176	0.833485	1	0	0
cg06601993	0.0565383	0.706884	0.632736	0.789721	8.49e-10	-0.179788	0.12589	0.153252	0.835447	1	0	0
cg01965939	0.0684664	0.657145	0.574623	0.751519	8.67e-10	-0.0966109	0.126326	0.444406	0.907909	1	0	0
cg12557114	0.0569919	0.705085	0.630565	0.788411	8.71e-10	-0.0734047	0.120426	0.542167	0.929225	1	0	0
cg09031776	0.0577865	0.701675	0.626539	0.785821	8.74e-10	0.167191	0.12713	0.188471	1.18198	0	0	0
cg04185041	0.0457051	1.32339	1.21	1.44741	8.76e-10	-0.0818856	0.133523	0.539698	0.921377	0	0	0
cg05888643	0.0522573	0.725893	0.655226	0.804181	8.77e-10	-0.14367	0.124152	0.247186	0.866173	1	0	0
cg11229273	0.0592989	0.690539	0.613407	0.777369	8.93e-10	-0.384395	0.128806	0.00284241	0.680863	1	1	1
cg10334750	0.0604312	0.695345	0.619049	0.781045	8.93e-10	-0.274962	0.123105	0.0255122	0.759601	1	1	1
cg21086503	0.0522647	0.725993	0.655307	0.804304	8.97e-10	0.175809	0.135422	0.194207	1.19221	0	0	0
cg26257771	0.0526611	0.724278	0.653251	0.803027	9.03e-10	0.000616939	0.126738	0.996116	1.00062	0	0	0
cg00395486	0.0585722	0.698557	0.622795	0.783536	9.08e-10	-0.30666	0.115147	0.00774006	0.735901	1	1	1
cg22197830	0.0589662	0.696901	0.620839	0.782281	9.12e-10	-0.0232474	0.12639	0.854065	0.977021	1	0	0
cg18792041	0.0516981	0.728642	0.658429	0.806343	9.15e-10	0.133394	0.122065	0.274475	1.1427	0	0	0
cg23393242	0.064542	1.48468	1.30826	1.68489	9.17e-10	0.122261	0.128779	0.342425	1.13005	1	0	0
cg21786381	0.0540039	0.717725	0.645424	0.798125	9.22e-10	-0.0374654	0.112886	0.739975	0.963228	1	0	0
cg04264908	0.0541738	1.39185	1.25205	1.54725	9.22e-10	-0.0307247	0.132647	0.816828	0.969743	0	0	0
cg05912079	0.0542169	0.717539	0.645203	0.797986	9.23e-10	-0.321346	0.124502	0.00984981	0.725172	1	1	1
cg04526361	0.0591694	0.644326	0.559747	0.741685	9.23e-10	0.061284	0.121055	0.612682	1.0632	0	0	0
cg20676696	0.0717972	1.43655	1.27925	1.6132	9.23e-10	-0.0212622	0.125956	0.865949	0.978962	0	0	0
cg01132484	0.0640829	1.48034	1.30561	1.67845	9.28e-10	0.281336	0.130372	0.0309318	1.3249	1	1	1
cg07475885	0.0551891	1.40184	1.25811	1.56198	9.33e-10	-0.0369149	0.128394	0.773721	0.963758	0	0	0
cg25326378	0.0622827	0.683136	0.604633	0.771831	9.46e-10	-0.0239415	0.132042	0.856119	0.976343	1	0	0
cg01511480	0.0489046	0.741414	0.673648	0.815997	9.48e-10	-0.241282	0.132478	0.0685614	0.78562	1	0	0
cg14472062	0.0471283	0.749583	0.683446	0.82212	9.59e-10	0.101644	0.120635	0.399465	1.10699	0	0	0
cg25531341	0.0560523	0.709778	0.635932	0.7922	9.61e-10	-0.213225	0.116183	0.066468	0.807974	1	0	0
cg04094193	0.0561958	0.691248	0.614097	0.778092	9.63e-10	-0.100741	0.121575	0.407313	0.904167	1	0	0
cg14135809	0.0603816	0.709168	0.635207	0.791741	9.63e-10	-0.0510803	0.121655	0.674575	0.950202	1	0	0
cg00657780	0.0557887	0.71096	0.63732	0.793108	9.66e-10	-0.106194	0.12134	0.381481	0.899251	1	0	0
cg03376340	0.0562876	0.708839	0.634798	0.791516	9.73e-10	-0.0142184	0.120917	0.906394	0.985882	1	0	0
cg11147251	0.0513597	0.730538	0.660579	0.807905	9.76e-10	-0.0605967	0.122491	0.62081	0.941203	1	0	0
cg25593954	0.0491102	1.35015	1.22625	1.48657	9.77e-10	0.126966	0.129889	0.328323	1.13538	1	0	0
cg19103398	0.0447484	0.707055	0.63268	0.790173	9.78e-10	-0.200766	0.11746	0.0874072	0.818104	1	0	0
cg04436083	0.0567069	0.760676	0.696802	0.830404	9.78e-10	-0.0692108	0.112623	0.538862	0.93313	1	0	0
cg14530275	0.044319	0.672318	0.591947	0.763601	9.83e-10	-0.226555	0.126859	0.0741176	0.797275	1	0	0
cg12732436	0.0649572	0.762706	0.69925	0.83192	9.83e-10	0.142116	0.119292	0.233527	1.15271	0	0	0
cg02110836	0.0645698	0.67397	0.593853	0.764897	9.92e-10	-0.00113585	0.120547	0.992482	0.998865	1	0	0
cg16450097	0.0610847	0.692164	0.615077	0.778913	1.01e-09	-0.290068	0.122987	0.0183474	0.748213	1	1	1
cg05629195	0.0511196	0.718945	0.646702	0.799258	1.01e-09	-0.221572	0.111843	0.0475805	0.801258	1	1	1
cg13304638	0.0859564	0.688569	0.610874	0.776145	1.01e-09	-0.14698	0.120199	0.221406	0.863311	1	0	0
cg11596863	0.0602441	1.37865	1.24365	1.5283	1.01e-09	0.0212533	0.126897	0.866988	1.02148	1	0	0
cg16348385	0.0525792	1.36648	1.23621	1.51049	1.01e-09	-0.0324181	0.129873	0.802886	0.968102	0	0	0
cg08548498	0.0540311	0.591574	0.499854	0.700124	1.01e-09	0.00316743	0.129887	0.980545	1.00317	0	0	0
cg18422632	0.0559978	0.710392	0.63655	0.7928	1.02e-09	-0.356044	0.117178	0.0023776	0.700442	1	1	1
cg24245418	0.0625239	1.46484	1.29589	1.65581	1.02e-09	-0.0261311	0.126674	0.836568	0.974207	0	0	0
cg21100077	0.0678746	1.51344	1.32492	1.72878	1.03e-09	0.182508	0.142674	0.200827	1.20022	1	0	0
cg13932501	0.0531863	0.699898	0.624101	0.784901	1.05e-09	-0.224979	0.119962	0.0607347	0.798533	1	0	0
cg11071407	0.0661947	0.722847	0.65129	0.802267	1.05e-09	-0.15738	0.113456	0.165395	0.854379	1	0	0
cg08721931	0.0501411	0.736426	0.667497	0.812474	1.05e-09	-0.0946747	0.112605	0.40048	0.909669	1	0	0
cg26802564	0.0584817	0.667688	0.586446	0.760183	1.05e-09	-0.0107132	0.132524	0.935569	0.989344	1	0	0
cg19753864	0.0588137	0.698508	0.622457	0.783851	1.06e-09	-0.187275	0.121474	0.12315	0.829216	1	0	0
cg20511815	0.0585896	0.699477	0.623594	0.784594	1.06e-09	0.133126	0.125279	0.287947	1.14239	0	0	0
cg00574958	0.0783037	0.620242	0.531997	0.723125	1.06e-09	0.0425082	0.119284	0.721571	1.04342	0	0	0
cg21576728	0.0734898	0.638762	0.553076	0.737724	1.07e-09	-0.0737503	0.124817	0.554609	0.928904	1	0	0
cg11839815	0.0553117	0.713703	0.640378	0.795424	1.07e-09	-0.0728071	0.128656	0.571457	0.92978	1	0	0
cg12072972	0.0530251	0.728122	0.657523	0.806303	1.08e-09	-0.385607	0.119695	0.00127488	0.680038	1	1	1
cg17231347	0.0520368	1.3817	1.24531	1.53302	1.08e-09	0.07319	0.123926	0.554792	1.07593	1	0	0
cg02511456	0.0598935	0.694136	0.617253	0.780596	1.09e-09	0.250828	0.123683	0.0425619	1.28509	0	1	0
cg03984209	0.0605986	0.629547	0.542492	0.730572	1.1e-09	-0.327908	0.129953	0.0116264	0.720429	1	1	1
cg07220152	0.0530746	1.3819	1.24537	1.53339	1.1e-09	0.15955	0.129368	0.217462	1.17298	1	0	0
cg15645138	0.0759337	0.691202	0.613795	0.778371	1.1e-09	-0.120163	0.117971	0.308399	0.886775	1	0	0
cg23342367	0.0587281	0.696518	0.620014	0.782463	1.11e-09	-0.0752871	0.120007	0.530424	0.927477	1	0	0
cg25649765	0.064179	1.43026	1.27475	1.60473	1.11e-09	-0.0591527	0.120038	0.622166	0.942563	0	0	0
cg11666559	0.0593643	1.47852	1.30376	1.67671	1.11e-09	-0.0108983	0.132388	0.934391	0.989161	0	0	0
cg00511464	0.0522031	0.727684	0.656912	0.80608	1.13e-09	0.154203	0.150532	0.305652	1.16673	0	0	0
cg27033712	0.0428991	0.770109	0.708005	0.837661	1.13e-09	0.137394	0.143237	0.337454	1.14728	0	0	0
cg20180050	0.0608405	0.690436	0.612824	0.777877	1.14e-09	-0.0818832	0.127136	0.519536	0.92138	1	0	0
cg11608390	0.0547842	0.716428	0.643487	0.797636	1.15e-09	-0.321202	0.119226	0.00705891	0.725277	1	1	1
cg22691926	0.0627674	0.6825	0.603496	0.771845	1.16e-09	-0.184179	0.122333	0.132182	0.831787	1	0	0
cg17209887	0.0476256	0.748501	0.681794	0.821734	1.18e-09	-0.313104	0.122001	0.0102757	0.731174	1	1	1
cg19737787	0.0671211	1.50416	1.31875	1.71565	1.19e-09	0.0458703	0.127053	0.718075	1.04694	1	0	0
cg19208681	0.0633144	0.680495	0.601079	0.770403	1.2e-09	0.0898928	0.138242	0.515527	1.09406	0	0	0
cg14377059	0.0646241	1.48099	1.3048	1.68097	1.23e-09	0.312953	0.142233	0.0277862	1.36746	1	1	1
cg11751808	0.0535739	0.722152	0.650169	0.802104	1.23e-09	-0.201331	0.118406	0.089067	0.817642	1	0	0
cg11378575	0.058471	0.700984	0.625083	0.786102	1.23e-09	-0.174453	0.121747	0.151883	0.839916	1	0	0
cg26025224	0.0622274	0.685176	0.606504	0.774052	1.23e-09	-0.00607571	0.137909	0.96486	0.993943	1	0	0
cg20862496	0.0470174	0.751525	0.685366	0.824072	1.24e-09	-0.285301	0.115147	0.0132226	0.751788	1	1	1
cg03658337	0.0731309	0.641289	0.555655	0.740122	1.24e-09	-0.0675719	0.12217	0.580197	0.934661	1	0	0
cg06008926	0.0453702	1.41357	1.26419	1.58061	1.25e-09	0.0384493	0.131811	0.770516	1.0392	1	0	0
cg23039580	0.0569866	1.3173	1.20522	1.43981	1.25e-09	-0.00265731	0.126895	0.983293	0.997346	0	0	0
cg00245878	0.0554772	0.713975	0.640414	0.795986	1.26e-09	-0.171249	0.116627	0.14201	0.842612	1	0	0
cg05870439	0.0618813	0.686768	0.608326	0.775324	1.26e-09	-0.134882	0.121845	0.268295	0.873819	1	0	0
cg14009912	0.0482812	0.65721	0.573933	0.752571	1.26e-09	-0.0148555	0.120646	0.902002	0.985254	1	0	0
cg24174959	0.0691295	0.745899	0.678551	0.81993	1.26e-09	0.171534	0.133427	0.198582	1.18712	0	0	0
cg12209693	0.0656093	0.671424	0.590405	0.76356	1.27e-09	-0.192921	0.131952	0.143728	0.824547	1	0	0
cg04256898	0.0791846	0.704165	0.628777	0.788593	1.27e-09	-0.157668	0.120627	0.191188	0.854133	1	0	0
cg12978253	0.0577747	0.618302	0.529418	0.722109	1.27e-09	-0.0786462	0.140089	0.574523	0.924367	1	0	0
cg04708321	0.0572292	0.706556	0.631587	0.790424	1.28e-09	-0.150193	0.114775	0.190675	0.860542	1	0	0
cg17892169	0.052109	1.37191	1.23871	1.51943	1.29e-09	0.0712993	0.132056	0.589253	1.0739	1	0	0
cg06442489	0.0636163	0.70074	0.624688	0.786051	1.3e-09	-0.184043	0.120116	0.12547	0.8319	1	0	0
cg20975074	0.0486528	0.679765	0.600079	0.770032	1.3e-09	-0.0986799	0.126455	0.435181	0.906033	1	0	0
cg25702780	0.0586157	1.34338	1.22119	1.47778	1.3e-09	-0.00869721	0.126681	0.945265	0.99134	0	0	0
cg04728482	0.0594846	1.43446	1.2766	1.61183	1.32e-09	-0.0799767	0.128674	0.53424	0.923138	0	0	0
cg26675200	0.0615276	0.695228	0.618152	0.781913	1.33e-09	-0.113071	0.120795	0.349245	0.893088	1	0	0
cg14579898	0.0599524	0.688581	0.610356	0.776833	1.33e-09	-0.0294701	0.123508	0.811409	0.97096	1	0	0
cg06748956	0.0546755	0.717854	0.644906	0.799053	1.34e-09	-0.0409784	0.117399	0.72705	0.95985	1	0	0
cg20512711	0.0685867	1.51548	1.32486	1.73353	1.35e-09	0.338148	0.133649	0.0114022	1.40235	1	1	1
cg04427816	0.0511514	0.733478	0.663509	0.810825	1.36e-09	-0.30957	0.117002	0.00814851	0.733762	1	1	1
cg26953954	0.0526242	0.727015	0.655767	0.806004	1.38e-09	-0.217255	0.122131	0.0752608	0.804725	1	0	0
cg12210457	0.0581046	0.699163	0.622714	0.784997	1.38e-09	-0.223236	0.127933	0.0809953	0.799926	1	0	0
cg04721719	0.057923	0.704083	0.628521	0.788729	1.38e-09	-0.0110571	0.119353	0.926188	0.989004	1	0	0
cg08022717	0.0590807	0.703275	0.627576	0.788105	1.38e-09	0.0829747	0.12558	0.508785	1.08651	0	0	0
cg02092102	0.0335594	1.49742	1.31399	1.70645	1.4e-09	0.379235	0.141751	0.0074649	1.46117	1	1	1
cg21702188	0.0631898	0.68204	0.602591	0.771964	1.4e-09	-0.264672	0.123632	0.0322907	0.767458	1	1	1
cg03098721	0.0666718	0.666966	0.585019	0.760391	1.4e-09	-0.233961	0.120892	0.0529556	0.791393	1	0	0
cg02628801	0.0668862	1.22536	1.14736	1.30867	1.4e-09	-0.356993	0.198935	0.0727299	0.699778	0	0	0
cg26548729	0.0519559	0.730125	0.659436	0.808393	1.41e-09	-0.099451	0.112943	0.378564	0.905334	1	0	0
cg00242627	0.0626903	1.46157	1.29258	1.65265	1.42e-09	0.120591	0.134127	0.36861	1.12816	1	0	0
cg10066231	0.0611642	0.726529	0.655114	0.805728	1.43e-09	-0.126745	0.111995	0.257761	0.880958	1	0	0
cg04431346	0.0527909	0.690616	0.612595	0.778573	1.43e-09	-0.123074	0.115529	0.286739	0.884198	1	0	0
cg11818438	0.0427557	0.733051	0.662899	0.810627	1.44e-09	-0.30841	0.111912	0.00585449	0.734614	1	1	1
cg11601197	0.0617812	0.772028	0.709969	0.839512	1.44e-09	-0.302313	0.114855	0.00848507	0.739106	1	1	1
cg15750546	0.0609408	1.44593	1.28315	1.62938	1.44e-09	0.0865618	0.124971	0.488525	1.09042	1	0	0
cg22825220	0.0559158	0.712957	0.638952	0.795535	1.44e-09	0.0899523	0.124793	0.471023	1.09412	0	0	0
cg19807257	0.0513235	1.45333	1.28759	1.64041	1.44e-09	-0.0629074	0.137198	0.646581	0.93903	0	0	0
cg13569051	0.0382933	0.680283	0.600461	0.770716	1.45e-09	-0.16382	0.12055	0.174168	0.848895	1	0	0
cg09029959	0.0468965	0.793195	0.735842	0.855018	1.45e-09	0.0551468	0.13492	0.682733	1.0567	0	0	0
cg13615100	0.0636806	0.698908	0.62232	0.784923	1.45e-09	0.0363705	0.124814	0.770747	1.03704	0	0	0
cg26822986	0.0592183	1.32808	1.21145	1.45594	1.45e-09	-0.00672407	0.121308	0.955796	0.993298	0	0	0
cg01218150	0.0359557	0.714131	0.640325	0.796443	1.46e-09	-0.168083	0.118252	0.1552	0.845284	1	0	0
cg27296071	0.0556591	1.24297	1.15839	1.33373	1.46e-09	-0.161048	0.153859	0.295225	0.851251	0	0	0
cg22117062	0.0470836	0.752203	0.685894	0.824921	1.47e-09	-0.370213	0.123866	0.0028005	0.690587	1	1	1
cg07164136	0.0523073	0.728905	0.65788	0.807597	1.49e-09	-0.0035347	0.116386	0.975772	0.996472	1	0	0
cg18514065	0.0607328	0.692737	0.614996	0.780304	1.5e-09	-0.0397572	0.123858	0.748218	0.961023	1	0	0
cg14196998	0.0639326	0.679547	0.599515	0.770263	1.51e-09	0.0586202	0.124188	0.636907	1.06037	0	0	0
cg06717850	0.0683897	1.51132	1.32173	1.7281	1.55e-09	0.0993347	0.137315	0.469431	1.10444	1	0	0
cg12890671	0.0621345	0.687215	0.60842	0.776214	1.57e-09	-0.218199	0.120228	0.0695434	0.803965	1	0	0
cg16311462	0.0462405	0.756433	0.690892	0.82819	1.57e-09	-0.192096	0.106929	0.0724175	0.825228	1	0	0
cg09408143	0.0530413	0.726013	0.654328	0.805552	1.57e-09	-0.0230498	0.120136	0.847849	0.977214	1	0	0
cg03854238	0.0577319	0.651493	0.566869	0.748749	1.58e-09	-0.214202	0.126518	0.0904441	0.807185	1	0	0
cg00335802	0.0528261	0.705751	0.630246	0.790302	1.58e-09	-0.179636	0.121499	0.139274	0.835575	1	0	0
cg00290626	0.0709899	0.726973	0.65547	0.806277	1.58e-09	-0.0296114	0.121011	0.806689	0.970823	1	0	0
cg23177095	0.0672337	0.711255	0.636743	0.794486	1.59e-09	-0.383571	0.115033	0.000854665	0.681424	1	1	1
cg14410476	0.0564626	1.5004	1.31516	1.71173	1.59e-09	0.104362	0.144414	0.469889	1.11	1	0	0
cg00927495	0.0698521	1.43046	1.27337	1.60694	1.62e-09	0.152527	0.122974	0.214855	1.16477	1	0	0
cg14160419	0.0568119	0.709854	0.635054	0.793464	1.62e-09	0.21001	0.144676	0.146615	1.23369	0	0	0
cg20559537	0.0593539	0.65615	0.572196	0.752422	1.62e-09	0.0688966	0.12447	0.579909	1.07133	0	0	0
cg09775930	0.0493025	1.43134	1.27384	1.6083	1.64e-09	0.100458	0.131421	0.444633	1.10568	1	0	0
cg05847784	0.0594749	1.34618	1.22219	1.48276	1.64e-09	0.0361634	0.127324	0.776391	1.03683	1	0	0
cg13417891	0.0527963	0.727365	0.655861	0.806664	1.65e-09	-0.179482	0.116744	0.124195	0.835703	1	0	0
cg23029193	0.0405221	1.27674	1.17926	1.38227	1.65e-09	0.154359	0.120078	0.198623	1.16691	1	0	0
cg03548170	0.0513605	0.692075	0.614023	0.780048	1.65e-09	-0.120578	0.130589	0.35583	0.886408	1	0	0
cg12219311	0.0610528	0.733703	0.663441	0.811407	1.65e-09	0.0273625	0.128805	0.831768	1.02774	0	0	0
cg02670637	0.0625216	0.695423	0.617951	0.782607	1.66e-09	-0.306677	0.130085	0.0183976	0.735888	1	1	1
cg25471639	0.0602615	0.685992	0.606877	0.775421	1.66e-09	0.107551	0.134824	0.425034	1.11355	0	0	0
cg09410862	0.0602797	0.695377	0.617889	0.782583	1.67e-09	0.0551045	0.125337	0.660191	1.05665	0	0	0
cg21204395	0.0657787	0.672766	0.591388	0.76534	1.68e-09	-0.142435	0.120127	0.235739	0.867244	1	0	0
cg15717617	0.0661543	0.671298	0.589664	0.764233	1.7e-09	-0.24742	0.127631	0.0525557	0.780812	1	0	0
cg16121907	0.053912	0.696385	0.619041	0.783393	1.7e-09	0.100457	0.137219	0.464111	1.10568	0	0	0
cg02351425	0.0600684	0.722692	0.650225	0.803237	1.7e-09	0.0344728	0.133513	0.796254	1.03507	0	0	0
cg22696984	0.0604116	0.69502	0.617412	0.782384	1.72e-09	-0.114678	0.12234	0.348571	0.891654	1	0	0
cg17180284	0.0637481	0.68126	0.601243	0.771925	1.74e-09	-0.232458	0.13166	0.0774629	0.792583	1	0	0
cg05777602	0.0538534	0.723083	0.650651	0.803578	1.74e-09	0.0439425	0.125809	0.726879	1.04492	0	0	0
cg25505880	0.0539951	0.722505	0.649951	0.803159	1.75e-09	-0.228609	0.118572	0.0538527	0.79564	1	0	0
cg11411705	0.0663585	0.670688	0.588892	0.763844	1.75e-09	-0.155245	0.125873	0.217448	0.856206	1	0	0
cg17521134	0.0556508	0.715363	0.64144	0.797804	1.75e-09	-0.115971	0.130012	0.372391	0.890501	1	0	0
cg17425484	0.0735313	1.55669	1.34776	1.79801	1.76e-09	0.123488	0.12488	0.322735	1.13144	1	0	0
cg04697635	0.0518637	0.763614	0.699397	0.833726	1.77e-09	-0.312524	0.102827	0.0023711	0.731598	1	1	1
cg04197847	0.0546878	0.719584	0.646444	0.800999	1.77e-09	-0.0892921	0.120519	0.458756	0.914578	1	0	0
cg07326602	0.0448187	0.731897	0.661155	0.810207	1.77e-09	-0.090354	0.12352	0.464477	0.913608	1	0	0
cg06052888	0.0522158	0.718081	0.644646	0.799881	1.78e-09	-0.191511	0.117448	0.102976	0.825711	1	0	0
cg14539231	0.0550423	1.44452	1.28142	1.62838	1.78e-09	0.138492	0.129342	0.284287	1.14854	1	0	0
cg27090409	0.0611277	0.73038	0.659329	0.809086	1.78e-09	0.0542317	0.126258	0.667537	1.05573	0	0	0
cg18130930	0.0510316	0.73569	0.665667	0.81308	1.8e-09	-0.0603835	0.11994	0.614651	0.941403	1	0	0
cg13496915	0.0564219	0.712257	0.637691	0.795542	1.81e-09	-0.20844	0.123844	0.0923592	0.811849	1	0	0
cg03835824	0.0594026	0.699643	0.622749	0.786032	1.82e-09	-0.0406325	0.119232	0.733264	0.960182	1	0	0
cg05684406	0.0604639	1.40407	1.25701	1.56835	1.83e-09	0.161675	0.129557	0.212064	1.17548	1	0	0
cg07416656	0.0564518	1.43838	1.27763	1.61935	1.83e-09	0.126334	0.130017	0.331214	1.13466	1	0	0
cg05463325	0.0593962	0.700144	0.623316	0.786441	1.84e-09	-0.313691	0.121875	0.0100569	0.730745	1	1	1
cg00635674	0.0553335	0.69975	0.622851	0.786142	1.84e-09	-0.246661	0.116541	0.0343014	0.781406	1	1	1
cg11340537	0.0593032	0.717051	0.643354	0.79919	1.84e-09	0.0837963	0.126933	0.509149	1.08741	0	0	0
cg16062877	0.0646814	0.677907	0.597191	0.769533	1.85e-09	-0.00205015	0.126069	0.987025	0.997952	1	0	0
cg03763118	0.0512107	0.71365	0.639293	0.796656	1.86e-09	-0.350099	0.123404	0.00455366	0.704618	1	1	1
cg18645002	0.0561389	0.735097	0.664896	0.812709	1.86e-09	-0.198595	0.128467	0.122133	0.819882	1	0	0
cg07922843	0.059031	0.701358	0.62473	0.787385	1.86e-09	-0.0968855	0.12342	0.432448	0.90766	1	0	0
cg22991101	0.0612718	1.44509	1.28156	1.62948	1.87e-09	0.0211701	0.131592	0.87219	1.0214	1	0	0
cg19932515	0.0707926	0.653563	0.56889	0.750838	1.88e-09	-0.121697	0.141922	0.391174	0.885417	1	0	0
cg08820079	0.0584147	0.70404	0.627877	0.789442	1.89e-09	-0.143196	0.123926	0.247886	0.866584	1	0	0
cg23186823	0.0499319	0.740854	0.671786	0.817024	1.89e-09	0.262987	0.145913	0.0714895	1.30081	0	0	0
cg19451021	0.0625536	0.708166	0.632748	0.792573	1.9e-09	-0.0985646	0.123092	0.423284	0.906137	1	0	0
cg14147498	0.0574531	1.45603	1.28803	1.64595	1.9e-09	0.0110928	0.127951	0.930913	1.01115	1	0	0
cg03804126	0.0580801	0.705508	0.629599	0.790569	1.9e-09	0.0151107	0.125504	0.904166	1.01523	0	0	0
cg24080086	0.063255	0.683982	0.60423	0.774261	1.92e-09	-0.103989	0.120379	0.387671	0.901235	1	0	0
cg06970472	0.0796757	0.619793	0.530184	0.724548	1.93e-09	-0.262514	0.154718	0.089747	0.769115	1	0	0
cg14143441	0.0492434	0.744119	0.675657	0.819517	1.95e-09	-0.328921	0.113366	0.00371486	0.7197	1	1	1
cg09369124	0.0465752	0.756132	0.690165	0.828405	1.95e-09	-0.0800216	0.111342	0.472326	0.923096	1	0	0
cg25717032	0.071581	0.650793	0.565605	0.748812	1.96e-09	-0.00149405	0.125489	0.990501	0.998507	1	0	0
cg18418803	0.0535024	0.725465	0.653244	0.805671	1.99e-09	-0.0127322	0.123544	0.917917	0.987349	1	0	0
cg17231571	0.0561204	0.714175	0.639786	0.797213	1.99e-09	-0.00976401	0.121148	0.935763	0.990283	1	0	0
cg01005308	0.0570238	0.710381	0.635261	0.794383	2.01e-09	-0.105848	0.12202	0.38569	0.899562	1	0	0
cg25023198	0.061413	0.691966	0.613493	0.780476	2.03e-09	-0.284447	0.127952	0.0262104	0.75243	1	1	1
cg01473816	0.0635151	0.683304	0.603323	0.773888	2.03e-09	0.014091	0.122035	0.908075	1.01419	0	0	0
cg22623649	0.05795	0.706535	0.630676	0.791518	2.04e-09	-0.191488	0.129045	0.137839	0.825729	1	0	0
cg21238818	0.0690379	1.51258	1.32115	1.73174	2.05e-09	0.133838	0.136104	0.325435	1.14321	1	0	0
cg15839913	0.0549098	0.71207	0.637219	0.795714	2.06e-09	-0.0809065	0.127669	0.526264	0.92228	1	0	0
cg00081087	0.0586235	0.703763	0.627373	0.789454	2.06e-09	0.0855823	0.129055	0.507236	1.08935	0	0	0
cg06312985	0.0566659	0.719598	0.646176	0.801363	2.06e-09	0.0774504	0.121012	0.522158	1.08053	0	0	0
cg11724147	0.0664123	0.671675	0.589697	0.765049	2.07e-09	-0.0670966	0.119227	0.573595	0.935105	1	0	0
cg13899678	0.0559027	1.39788	1.25281	1.55975	2.07e-09	0.0625067	0.127786	0.624733	1.0645	1	0	0
cg00618155	0.0535456	0.725548	0.653263	0.805832	2.08e-09	-0.416191	0.11625	0.000343434	0.659555	1	1	1
cg11789371	0.0578982	0.70688	0.631049	0.791824	2.08e-09	-0.00396721	0.130564	0.97576	0.996041	1	0	0
cg01941895	0.0615302	1.44562	1.28138	1.6309	2.1e-09	-0.00306768	0.131912	0.981446	0.996937	0	0	0
cg01966129	0.0616853	0.691134	0.612429	0.779953	2.11e-09	-0.212663	0.121077	0.0790159	0.808429	1	0	0
cg15711246	0.0543156	0.722329	0.649384	0.803468	2.12e-09	-0.16395	0.120533	0.173764	0.848785	1	0	0
cg01108642	0.0587825	0.728601	0.656872	0.808163	2.12e-09	0.123617	0.127938	0.333934	1.13158	0	0	0
cg14372520	0.0528771	0.703277	0.626745	0.789155	2.12e-09	0.059814	0.122758	0.62608	1.06164	0	0	0
cg26472225	0.0644955	0.67964	0.598936	0.771219	2.13e-09	-0.118204	0.132587	0.372649	0.888515	1	0	0
cg12938068	0.0523134	1.33387	1.2138	1.46581	2.15e-09	0.177017	0.129077	0.17025	1.19365	1	0	0
cg05090137	0.0481278	0.731135	0.659885	0.810078	2.15e-09	-0.115736	0.121012	0.338869	0.89071	1	0	0
cg03174768	0.0554097	0.717775	0.643908	0.800117	2.17e-09	-0.138877	0.123119	0.259327	0.870335	1	0	0
cg10878966	0.054991	0.719577	0.646054	0.801467	2.17e-09	-0.092561	0.116679	0.427607	0.911594	1	0	0
cg21768395	0.0544754	0.731967	0.660809	0.810787	2.23e-09	-0.236445	0.121347	0.0513546	0.789429	1	0	0
cg01060282	0.0521795	0.721986	0.648873	0.803338	2.23e-09	-0.022034	0.124651	0.859693	0.978207	1	0	0
cg19194237	0.0451465	0.689006	0.609797	0.778503	2.25e-09	-0.23049	0.120664	0.056111	0.794145	1	0	0
cg01907584	0.062309	1.30984	1.19892	1.43102	2.25e-09	-0.0302395	0.12367	0.806829	0.970213	0	0	0
cg09723979	0.0557577	1.39552	1.25105	1.55667	2.27e-09	-0.21425	0.126756	0.0909793	0.807146	0	0	0
cg19028462	0.0531718	0.72776	0.655735	0.807696	2.28e-09	-0.0836385	0.120697	0.488334	0.919764	1	0	0
cg11337289	0.0569408	1.45072	1.28406	1.63901	2.29e-09	0.164645	0.13819	0.233481	1.17897	1	0	0
cg02730156	0.0622629	1.43715	1.27597	1.61869	2.29e-09	0.0141482	0.134627	0.916303	1.01425	1	0	0
cg04055086	0.0606912	0.711571	0.636429	0.795584	2.29e-09	0.048542	0.130271	0.709429	1.04974	0	0	0
cg08975197	0.0579048	0.741032	0.671643	0.81759	2.3e-09	-0.100904	0.122702	0.410876	0.90402	1	0	0
cg27613174	0.0460805	1.31696	1.20323	1.44144	2.3e-09	0.0492405	0.125186	0.69407	1.05047	1	0	0
cg06622573	0.0501625	0.707513	0.631605	0.792543	2.3e-09	-0.0380506	0.117783	0.746652	0.962664	1	0	0
cg22946147	0.0631378	0.685764	0.605943	0.776099	2.31e-09	-0.144782	0.123539	0.241216	0.865211	1	0	0
cg02074591	0.0529973	1.37247	1.23706	1.5227	2.31e-09	-0.142924	0.142564	0.316089	0.86682	0	0	0
cg27583383	0.0494051	0.74445	0.675743	0.820142	2.33e-09	-0.058318	0.119987	0.62694	0.94335	1	0	0
cg00293660	0.076099	0.705508	0.629195	0.791077	2.34e-09	-0.137522	0.116562	0.238071	0.871515	1	0	0
cg23368579	0.0584076	0.634766	0.546812	0.736868	2.34e-09	0.16166	0.124301	0.193411	1.17546	0	0	0
cg10449409	0.0497139	0.743152	0.674157	0.819208	2.35e-09	-0.0376275	0.113884	0.741097	0.963072	1	0	0
cg26414257	0.0635859	0.684087	0.60393	0.774882	2.36e-09	-0.132814	0.121406	0.273968	0.875628	1	0	0
cg24553417	0.0658022	0.727015	0.654752	0.807254	2.39e-09	0.0691962	0.118353	0.558777	1.07165	0	0	0
cg23277715	0.0534147	0.675196	0.593498	0.768141	2.39e-09	0.0149956	0.126435	0.90559	1.01511	0	0	0
cg00817100	0.0518806	1.36292	1.23114	1.5088	2.4e-09	0.0802946	0.127405	0.528543	1.08361	1	0	0
cg00163006	0.0594205	0.701516	0.624394	0.788164	2.43e-09	-0.110587	0.128681	0.390122	0.895308	1	0	0
cg24906316	0.0506293	0.739313	0.669472	0.816439	2.44e-09	-0.0611571	0.120339	0.61131	0.940675	1	0	0
cg01380884	0.0694027	0.661011	0.576943	0.757329	2.45e-09	-0.385968	0.118111	0.00108369	0.679792	1	1	1
cg20737185	0.0505559	1.35196	1.22442	1.49278	2.45e-09	-0.0992437	0.137549	0.470594	0.905522	0	0	0
cg10418524	0.0613792	1.44207	1.27862	1.62642	2.46e-09	0.0481902	0.132478	0.716037	1.04937	1	0	0
cg16270399	0.0551997	0.719486	0.645709	0.801694	2.46e-09	-2.12e-05	0.123197	0.999863	0.999979	1	0	0
cg04109781	0.0590523	1.42215	1.26672	1.59665	2.47e-09	0.0937562	0.127653	0.462666	1.09829	1	0	0
cg17442852	0.0562892	0.714877	0.640203	0.798261	2.48e-09	-0.0650789	0.126965	0.60825	0.936994	1	0	0
cg16707808	0.0764727	0.793458	0.735346	0.856163	2.5e-09	-0.155727	0.115161	0.176294	0.855793	1	0	0
cg06985056	0.0388068	0.633869	0.54564	0.736365	2.5e-09	-0.0450844	0.123166	0.714331	0.955917	1	0	0
cg04099543	0.0580983	0.707266	0.631145	0.792567	2.5e-09	0.00993755	0.126763	0.937514	1.00999	0	0	0
cg06685950	0.0520584	0.733219	0.662097	0.811982	2.51e-09	-0.184601	0.114736	0.107634	0.831436	1	0	0
cg13413384	0.0563644	0.71466	0.639915	0.798136	2.52e-09	-0.099291	0.120118	0.408455	0.905479	1	0	0
cg18131548	0.0507997	1.49555	1.31012	1.70723	2.53e-09	0.327285	0.134166	0.0147115	1.3872	1	1	1
cg16225800	0.067541	0.738796	0.668781	0.816142	2.53e-09	0.0846955	0.134967	0.530313	1.08839	0	0	0
cg01730177	0.0503046	0.741002	0.671429	0.817784	2.54e-09	-0.353318	0.111813	0.00157823	0.702354	1	1	1
cg18786643	0.0642781	0.731137	0.659569	0.810471	2.55e-09	-0.208372	0.125196	0.0960377	0.811905	1	0	0
cg09601629	0.0541522	1.38079	1.24175	1.53541	2.55e-09	0.0684426	0.124533	0.582599	1.07084	1	0	0
cg10211062	0.0525594	0.681815	0.601109	0.773357	2.55e-09	0.0740738	0.12646	0.558044	1.07689	0	0	0
cg15756227	0.0591781	1.42264	1.26684	1.59759	2.57e-09	-0.0217958	0.133704	0.870507	0.97844	0	0	0
cg07189401	0.0543025	1.38189	1.24237	1.53708	2.58e-09	-0.185431	0.127685	0.146432	0.830746	0	0	0
cg17311683	0.0464434	0.758359	0.692376	0.83063	2.59e-09	-0.00107816	0.111325	0.992273	0.998922	1	0	0
cg13448828	0.059395	0.702117	0.624961	0.7888	2.61e-09	-0.135448	0.119441	0.256788	0.873325	1	0	0
cg07735577	0.0655065	0.677096	0.595513	0.769856	2.64e-09	-0.0304417	0.126722	0.810157	0.970017	1	0	0
cg27332196	0.0540056	0.72512	0.652289	0.806082	2.66e-09	-0.235154	0.110274	0.0329697	0.790449	1	1	1
cg07582825	0.0597509	0.700748	0.623307	0.787811	2.66e-09	-0.226929	0.133009	0.0879875	0.796977	1	0	0
cg18500322	0.0674081	0.669545	0.586681	0.764113	2.66e-09	-0.150855	0.125373	0.228881	0.859972	1	0	0
cg09848947	0.060953	0.732854	0.661534	0.811863	2.68e-09	-0.199745	0.114712	0.0816367	0.81894	1	0	0
cg07910488	0.0522381	0.695804	0.617453	0.784098	2.68e-09	-0.0745277	0.123782	0.547115	0.928182	1	0	0
cg17808631	0.0614402	0.693836	0.615119	0.782628	2.69e-09	-0.0559434	0.124835	0.654053	0.945593	1	0	0
cg22027204	0.0596333	0.701397	0.624028	0.788359	2.72e-09	-0.321808	0.124641	0.0098267	0.724837	1	1	1
cg09987231	0.0651403	0.678815	0.597453	0.771256	2.73e-09	-0.109066	0.122739	0.374221	0.896672	1	0	0
cg07826859	0.0634689	0.68564	0.605441	0.776464	2.74e-09	0.0601436	0.129106	0.641324	1.06199	0	0	0
cg14372245	0.061516	0.69659	0.618328	0.784758	2.75e-09	-0.220295	0.132064	0.095297	0.802282	1	0	0
cg20432350	0.0608063	0.693657	0.614868	0.782541	2.75e-09	-0.0546924	0.122709	0.655807	0.946776	1	0	0
cg04510153	0.080508	0.619708	0.529247	0.72563	2.79e-09	-0.240901	0.136815	0.0782761	0.785919	1	0	0
cg01071185	0.0576846	0.709742	0.633868	0.794697	2.79e-09	-0.0983542	0.118761	0.407577	0.906328	1	0	0
cg03563083	0.050664	0.740001	0.67005	0.817255	2.8e-09	-0.243179	0.117443	0.038395	0.784131	1	1	1
cg13563959	0.0485488	0.749377	0.681358	0.824186	2.8e-09	0.031789	0.124348	0.798225	1.0323	0	0	0
cg01549977	0.0530057	0.729826	0.657811	0.809726	2.82e-09	-0.159356	0.116845	0.172623	0.852693	1	0	0
cg02337836	0.0520794	1.36265	1.23042	1.50909	2.82e-09	-0.0624201	0.129378	0.629478	0.939488	0	0	0
cg02039485	0.0517705	0.712391	0.636968	0.796745	2.86e-09	-0.2073	0.121701	0.0885025	0.812776	1	0	0
cg00710343	0.0570967	0.735287	0.664339	0.813812	2.86e-09	0.13601	0.129857	0.294923	1.14569	0	0	0
cg18236464	0.0758674	0.637399	0.54933	0.739588	2.92e-09	0.143357	0.130319	0.271311	1.15414	0	0	0
cg15705175	0.0680958	0.667551	0.584146	0.762865	2.94e-09	-0.352516	0.128412	0.00604743	0.702917	1	1	1
cg16811650	0.0586386	0.706138	0.629471	0.792141	2.96e-09	-0.213137	0.126344	0.0916114	0.808045	1	0	0
cg08310866	0.0522055	1.3631	1.23053	1.50996	2.96e-09	-0.0183284	0.138888	0.895011	0.981839	0	0	0
cg21924472	0.0611816	0.69567	0.617057	0.784298	3.01e-09	-0.238904	0.129877	0.0658479	0.787491	1	0	0
cg16725552	0.0624532	0.690504	0.61095	0.780416	3.03e-09	0.0754329	0.128239	0.556382	1.07835	0	0	0
cg05390144	0.0454099	0.763952	0.698897	0.835063	3.04e-09	-0.0205947	0.117326	0.86066	0.979616	1	0	0
cg05453820	0.0685339	0.666129	0.582401	0.761893	3.07e-09	-0.248716	0.129748	0.055248	0.779802	1	0	0
cg12502460	0.0614817	0.694592	0.615739	0.783544	3.08e-09	0.186992	0.129611	0.149099	1.20562	0	0	0
cg08545287	0.0585446	1.41481	1.26143	1.58683	3.09e-09	-0.075305	0.143013	0.598499	0.927461	0	0	0
cg05339727	0.0535276	1.37329	1.23652	1.5252	3.1e-09	-0.0509194	0.125835	0.685734	0.950355	0	0	0
cg01039763	0.0556898	0.718919	0.64458	0.801832	3.11e-09	-0.0736418	0.118357	0.533809	0.929004	1	0	0
cg08675364	0.0473821	0.694389	0.615468	0.78343	3.12e-09	-0.199768	0.120671	0.0978277	0.818921	1	0	0
cg04503054	0.061557	0.755224	0.688247	0.828719	3.12e-09	0.102506	0.128192	0.423923	1.10794	0	0	0
cg19391384	0.0654225	0.715699	0.640714	0.799461	3.15e-09	-0.196365	0.113517	0.0836619	0.821712	1	0	0
cg01704534	0.0564692	0.678727	0.597046	0.771583	3.15e-09	0.00799593	0.136102	0.953152	1.00803	0	0	0
cg18845960	0.0611087	0.696346	0.617745	0.784948	3.17e-09	-0.128565	0.11319	0.256023	0.879356	1	0	0
cg19068510	0.0592786	1.42055	1.26473	1.59556	3.18e-09	0.0901227	0.131163	0.492017	1.09431	1	0	0
cg11396411	0.0422409	0.778731	0.716856	0.845947	3.21e-09	-0.11447	0.118578	0.334363	0.891838	1	0	0
cg23250795	0.0453903	0.764405	0.699338	0.835526	3.24e-09	0.0650447	0.121915	0.593669	1.06721	0	0	0
cg22300566	0.0576506	0.710911	0.634955	0.795953	3.25e-09	-0.115456	0.123935	0.351549	0.890959	1	0	0
cg11812218	0.0630565	1.45237	1.28352	1.64342	3.25e-09	0.0761454	0.132164	0.564517	1.07912	1	0	0
cg22621734	0.061894	0.693311	0.614107	0.782731	3.26e-09	-0.166096	0.117774	0.158451	0.846965	1	0	0
cg13261106	0.0525754	0.732633	0.660898	0.812155	3.27e-09	-0.451167	0.11518	8.96e-05	0.636885	1	1	1
cg13966771	0.058445	0.707703	0.631106	0.793596	3.31e-09	-0.230797	0.12038	0.055207	0.793901	1	0	0
cg14361654	0.0586748	0.703617	0.626246	0.790548	3.33e-09	-0.117768	0.114541	0.303866	0.888902	1	0	0
cg19000647	0.0594357	0.706779	0.629998	0.792917	3.33e-09	0.124584	0.129086	0.334484	1.13268	0	0	0
cg19981828	0.0664903	0.718723	0.644202	0.801865	3.34e-09	-0.451211	0.121685	0.000208893	0.636857	1	1	1
cg25221637	0.0558497	0.674884	0.592423	0.768822	3.34e-09	-0.153095	0.124939	0.220442	0.858049	1	0	0
cg21236177	0.0588646	0.706025	0.629092	0.792365	3.35e-09	-0.230185	0.12764	0.0713279	0.794387	1	0	0
cg03896269	0.0660152	0.676863	0.594714	0.770359	3.38e-09	0.0265112	0.119571	0.824532	1.02687	0	0	0
cg23699463	0.0662969	0.6758	0.593452	0.769573	3.41e-09	-0.307839	0.129735	0.0176528	0.735034	1	1	1
cg26690744	0.0675558	1.49069	1.30582	1.70173	3.43e-09	0.00143469	0.133991	0.991457	1.00144	1	0	0
cg10747118	0.0592722	1.4194	1.26373	1.59426	3.44e-09	0.0473652	0.135428	0.726531	1.0485	1	0	0
cg22552457	0.0576316	0.711488	0.635494	0.79657	3.5e-09	-0.13067	0.112426	0.245125	0.877508	1	0	0
cg16962463	0.0676574	0.67061	0.587327	0.765703	3.51e-09	-0.255326	0.125175	0.0413744	0.774664	1	1	1
cg02268965	0.0545334	0.724657	0.651199	0.806401	3.51e-09	-0.20995	0.129547	0.105093	0.810625	1	0	0
cg04629189	0.0615685	0.728711	0.656051	0.80942	3.52e-09	-0.0461944	0.118527	0.69673	0.954856	1	0	0
cg09385093	0.0535927	1.43849	1.27497	1.62298	3.52e-09	-0.15308	0.123788	0.216222	0.858061	0	0	0
cg23726526	0.0585398	1.41293	1.25977	1.58471	3.53e-09	0.13373	0.128491	0.297979	1.14308	1	0	0
cg26940518	0.0737459	0.647022	0.559946	0.747638	3.55e-09	-0.257927	0.145312	0.0758998	0.772652	1	0	0
cg00303606	0.0539036	0.727463	0.654528	0.808526	3.57e-09	0.0546838	0.128307	0.669965	1.05621	0	0	0
cg16085374	0.0608658	0.698186	0.619672	0.786647	3.58e-09	0.00620288	0.123831	0.960049	1.00622	0	0	0
cg18993113	0.0568949	0.714763	0.639342	0.799082	3.59e-09	-0.222955	0.120852	0.0650575	0.800151	1	0	0
cg05452084	0.0584941	0.70805	0.631355	0.794062	3.59e-09	-0.108812	0.109819	0.321767	0.896899	1	0	0
cg22833603	0.0531877	0.73061	0.658282	0.810884	3.61e-09	-0.341227	0.125765	0.00666328	0.710898	1	1	1
cg17228232	0.0509133	0.740503	0.670177	0.818209	3.62e-09	0.0227424	0.129296	0.860377	1.023	0	0	0
cg08922179	0.0442793	0.770126	0.706108	0.839948	3.66e-09	0.0454019	0.140588	0.746737	1.04645	0	0	0
cg03875819	0.06059	0.699501	0.621175	0.787703	3.67e-09	-0.398096	0.136061	0.00343509	0.671597	1	1	1
cg05862356	0.0584151	1.41135	1.25867	1.58255	3.68e-09	0.301393	0.137733	0.0286519	1.35174	1	1	1
cg23841763	0.0565838	0.716258	0.64107	0.800265	3.69e-09	-0.142595	0.110607	0.197327	0.867105	1	0	0
cg14060519	0.0570163	0.690051	0.610002	0.780605	3.7e-09	-0.137365	0.127567	0.281567	0.871652	1	0	0
cg01148127	0.062911	0.714451	0.638911	0.798923	3.7e-09	-0.0990436	0.124944	0.427952	0.905703	1	0	0
cg10970251	0.0488925	1.33411	1.2122	1.46828	3.73e-09	0.0687599	0.126227	0.585936	1.07118	1	0	0
cg26413528	0.0561503	0.692952	0.613386	0.78284	3.76e-09	-0.041784	0.128987	0.745984	0.959077	1	0	0
cg02646706	0.0622292	0.718215	0.643368	0.80177	3.76e-09	-0.0224292	0.123594	0.855994	0.97782	1	0	0
cg24894318	0.0481462	0.75298	0.685175	0.827495	3.8e-09	-0.243278	0.109936	0.0269042	0.784053	1	1	1
cg06080005	0.0364688	1.23971	1.15419	1.33156	3.81e-09	-0.103351	0.148579	0.486679	0.90181	0	0	0
cg05233373	0.0627589	0.6909	0.610934	0.781332	3.82e-09	-0.212513	0.116728	0.0686692	0.80855	1	0	0
cg12649038	0.0471509	0.757459	0.690596	0.830796	3.83e-09	0.0365097	0.124374	0.769104	1.03718	0	0	0
cg24934011	0.0548688	0.723803	0.650004	0.805981	3.84e-09	-0.0927421	0.128673	0.471058	0.911428	1	0	0
cg24522085	0.0538227	0.728295	0.65538	0.809322	3.85e-09	-0.0536841	0.114968	0.640536	0.947731	1	0	0
cg16698286	0.0550985	0.722868	0.648872	0.805303	3.86e-09	-0.101974	0.113467	0.368807	0.903053	1	0	0
cg06520675	0.0601792	1.48115	1.29964	1.688	3.87e-09	0.161598	0.131222	0.218142	1.17539	1	0	0
cg05917419	0.0666982	0.701577	0.62352	0.789405	3.87e-09	-0.0141445	0.129183	0.912812	0.985955	1	0	0
cg00299893	0.0644104	0.684346	0.603183	0.776429	3.89e-09	-0.190693	0.125807	0.129581	0.826386	1	0	0
cg18694313	0.0757107	0.64033	0.552025	0.742761	3.91e-09	0.0560286	0.123369	0.649717	1.05763	0	0	0
cg00231504	0.0532867	1.4358	1.27291	1.61953	3.92e-09	0.147885	0.129193	0.25234	1.15938	1	0	0
cg13895235	0.0614379	1.36853	1.23281	1.51919	3.92e-09	0.133019	0.126496	0.292997	1.14227	1	0	0
cg26261502	0.0669698	1.4833	1.30084	1.69135	3.93e-09	0.284444	0.143133	0.0468916	1.32902	1	1	1
cg27569829	0.0423247	1.47993	1.29885	1.68626	3.94e-09	0.262082	0.130241	0.0441895	1.29963	1	1	1
cg06921552	0.0665923	1.28294	1.18081	1.39391	3.94e-09	-0.0313779	0.129986	0.80925	0.969109	0	0	0
cg22616933	0.0539546	0.727916	0.65487	0.80911	3.96e-09	0.116049	0.131179	0.376339	1.12305	0	0	0
cg00340024	0.0552506	0.7224	0.648259	0.805021	3.97e-09	-0.259465	0.121685	0.0329848	0.771464	1	1	1
cg26767974	0.0605082	0.700391	0.622065	0.788579	3.97e-09	-0.080524	0.120278	0.503187	0.922633	1	0	0
cg14349862	0.0536644	0.729191	0.65639	0.810066	3.98e-09	-0.0707399	0.122142	0.562481	0.931704	1	0	0
cg19766988	0.0620802	0.693977	0.614473	0.783769	3.99e-09	-0.216391	0.118514	0.067871	0.80542	1	0	0
cg03734864	0.0554378	0.692485	0.612707	0.782651	4e-09	-0.198237	0.116943	0.0900457	0.820175	1	0	0
cg19215199	0.0624504	0.72165	0.647348	0.80448	4e-09	-0.000739038	0.125738	0.99531	0.999261	1	0	0
cg21201357	0.0711071	1.51934	1.32169	1.74655	4.05e-09	0.049658	0.13947	0.721805	1.05091	1	0	0
cg07557790	0.0502736	1.34409	1.21796	1.48327	4.05e-09	-0.244997	0.145548	0.0923229	0.782707	0	0	0
cg04690998	0.0632946	0.689183	0.608777	0.780209	4.07e-09	0.108116	0.122236	0.376431	1.11418	0	0	0
cg24290996	0.0662588	0.677284	0.594801	0.771206	4.08e-09	-0.209674	0.123487	0.0895187	0.810849	1	0	0
cg13484549	0.056232	1.39191	1.24665	1.55409	4.09e-09	0.306122	0.130457	0.0189486	1.35815	1	1	1
cg06567227	0.0494511	1.33748	1.21393	1.4736	4.1e-09	0.126539	0.127153	0.319653	1.13489	1	0	0
cg25373579	0.0554451	0.721819	0.64749	0.80468	4.12e-09	0.032577	0.118965	0.78421	1.03311	0	0	0
cg00715197	0.0541413	0.67421	0.591169	0.768916	4.14e-09	-0.306515	0.130851	0.0191561	0.736007	1	1	1
cg09131151	0.0670622	0.727404	0.65417	0.808837	4.14e-09	-0.131388	0.117663	0.264144	0.876877	1	0	0
cg03157700	0.0543856	0.726383	0.652939	0.808088	4.15e-09	-0.0808272	0.117711	0.492299	0.922353	1	0	0
cg15852891	0.052822	1.36403	1.22987	1.51281	4.18e-09	0.278429	0.125815	0.0268975	1.32105	1	1	1
cg07501233	0.0657298	1.47147	1.2936	1.67379	4.19e-09	0.184756	0.134423	0.169307	1.20292	1	0	0
cg19961013	0.0578948	0.711645	0.635307	0.797157	4.21e-09	0.0915748	0.125438	0.465364	1.0959	0	0	0
cg05442408	0.0421964	1.3941	1.24784	1.55751	4.22e-09	0.0411552	0.135629	0.761555	1.04201	1	0	0
cg05264232	0.0565503	0.780418	0.718472	0.847705	4.22e-09	-0.0337746	0.128305	0.792368	0.966789	1	0	0
cg06908460	0.030536	1.41865	1.26243	1.5942	4.23e-09	-0.196702	0.131679	0.135227	0.821435	0	0	0
cg08844894	0.0595238	1.1965	1.12699	1.2703	4.23e-09	-0.180327	0.159462	0.258121	0.834997	0	0	0
cg07890954	0.0571204	0.761759	0.695646	0.834154	4.24e-09	-0.25341	0.117007	0.0303288	0.776149	1	1	1
cg12417609	0.0463216	0.714933	0.639211	0.799625	4.24e-09	-0.25773	0.12024	0.0320755	0.772804	1	1	1
cg25679431	0.0560891	0.719291	0.644409	0.802875	4.24e-09	-0.0932534	0.120317	0.438301	0.910963	1	0	0
cg16450249	0.0586306	0.708639	0.631712	0.794935	4.25e-09	-0.365674	0.126107	0.003735	0.693729	1	1	1
cg07030373	0.056864	0.716124	0.640598	0.800555	4.31e-09	-0.131287	0.120213	0.274781	0.876966	1	0	0
cg06228857	0.0571038	0.715137	0.639415	0.799827	4.32e-09	-0.291324	0.125258	0.0200293	0.747274	1	1	1
cg13033722	0.0650526	0.682607	0.600894	0.775432	4.37e-09	-0.327609	0.135618	0.0157064	0.720645	1	1	1
cg01587682	0.0638943	1.45498	1.28372	1.64909	4.39e-09	0.190132	0.149064	0.202132	1.20941	1	0	0
cg06655216	0.0795259	0.627119	0.536608	0.732896	4.42e-09	-0.120437	0.133125	0.365629	0.886533	1	0	0
cg07830226	0.0565711	0.717546	0.642239	0.801684	4.43e-09	-0.199863	0.122757	0.1035	0.818843	1	0	0
cg01165142	0.0572663	0.714638	0.638765	0.799524	4.44e-09	0.0673429	0.131827	0.609461	1.06966	0	0	0
cg08722675	0.0596703	0.704655	0.626881	0.792078	4.45e-09	-0.116564	0.12866	0.364942	0.889973	1	0	0
cg15558762	0.0571696	0.715072	0.639274	0.799857	4.46e-09	0.0739397	0.123579	0.549627	1.07674	0	0	0
cg20123355	0.0702327	0.70326	0.625205	0.79106	4.5e-09	-0.245713	0.121489	0.0431237	0.782147	1	1	1
cg18779570	0.0600251	0.662392	0.577208	0.760146	4.5e-09	-0.124601	0.128084	0.330649	0.882849	1	0	0
cg05935075	0.0443686	0.723844	0.649731	0.806411	4.52e-09	-0.305815	0.122773	0.0127421	0.736523	1	1	1
cg04208434	0.0551122	0.689414	0.608827	0.780668	4.52e-09	-0.243147	0.13004	0.061514	0.784156	1	0	0
cg09360931	0.0634239	0.770911	0.706704	0.840951	4.52e-09	0.0417041	0.113871	0.714187	1.04259	0	0	0
cg04943065	0.0530239	0.695181	0.615626	0.785016	4.53e-09	-0.143376	0.121345	0.237382	0.866428	1	0	0
cg22338356	0.0545311	0.72633	0.652705	0.808259	4.53e-09	-0.0545902	0.12612	0.665127	0.946873	1	0	0
cg20272962	0.0620072	1.36468	1.22997	1.51413	4.53e-09	-0.168156	0.134402	0.210883	0.845222	0	0	0
cg19695805	0.0407912	0.589315	0.49382	0.703279	4.56e-09	-0.235903	0.138294	0.0880436	0.789857	1	0	0
cg01149929	0.0507823	0.74252	0.672175	0.820227	4.56e-09	-0.170903	0.118135	0.147987	0.842903	1	0	0
cg08111414	0.0902013	0.787305	0.726811	0.852834	4.56e-09	-0.0224842	0.105383	0.831049	0.977767	1	0	0
cg01119831	0.0601091	0.703131	0.624988	0.791045	4.64e-09	-0.019312	0.126848	0.878994	0.980873	1	0	0
cg13880113	0.0490662	0.666493	0.581896	0.763388	4.67e-09	-0.137712	0.122286	0.260101	0.871349	1	0	0
cg18392783	0.0692548	1.33304	1.21081	1.4676	4.67e-09	0.080261	0.123894	0.5171	1.08357	1	0	0
cg17153568	0.0549091	1.37944	1.23869	1.53618	4.67e-09	-0.09752	0.130807	0.455955	0.907084	0	0	0
cg09366342	0.0575016	1.4005	1.25123	1.56757	4.69e-09	0.185254	0.13338	0.164859	1.20352	1	0	0
cg08180025	0.0513791	0.740105	0.669205	0.818516	4.69e-09	-0.13594	0.115667	0.239886	0.872895	1	0	0
cg26946114	0.0777232	0.634281	0.544658	0.738652	4.7e-09	-0.310386	0.141202	0.0279373	0.733164	1	1	1
cg12821539	0.0585421	1.38015	1.23909	1.53728	4.71e-09	0.127514	0.132432	0.335616	1.136	1	0	0
cg15842722	0.0550097	0.709716	0.632781	0.796005	4.71e-09	0.224135	0.123094	0.0686302	1.25124	0	0	0
cg16413535	0.0479148	0.755321	0.687617	0.829692	4.73e-09	0.0488936	0.133047	0.713252	1.05011	0	0	0
cg11257689	0.0601332	0.703179	0.625	0.791136	4.74e-09	0.186502	0.1385	0.178112	1.20503	0	0	0
cg02892925	0.0569367	0.716543	0.640881	0.801137	4.79e-09	-0.162483	0.123303	0.187585	0.85003	1	0	0
cg24625136	0.0588022	1.41089	1.25731	1.58324	4.8e-09	0.150553	0.134684	0.263642	1.16248	1	0	0
cg06161099	0.0631765	0.748008	0.678702	0.824392	4.84e-09	-0.26504	0.10823	0.0143306	0.767176	1	1	1
cg02576415	0.049609	0.689151	0.608368	0.78066	4.84e-09	-0.151339	0.131376	0.24934	0.859556	1	0	0
cg14183922	0.0636133	0.690905	0.61044	0.781978	4.84e-09	-0.0130677	0.124138	0.916163	0.987017	1	0	0
cg24197091	0.0472784	1.31872	1.20201	1.44676	4.86e-09	0.0343421	0.125402	0.784195	1.03494	1	0	0
cg01248745	0.0674616	1.48401	1.30021	1.69379	4.87e-09	0.153757	0.12611	0.222756	1.16621	1	0	0
cg26621897	0.0589665	0.708216	0.630918	0.794983	4.89e-09	-0.109051	0.124877	0.382517	0.896685	1	0	0
cg01048372	0.0617637	0.69673	0.617293	0.78639	4.9e-09	-0.33881	0.123974	0.0062776	0.712618	1	1	1
cg02246928	0.0511392	0.669925	0.585787	0.766149	4.91e-09	-0.241372	0.133112	0.0697863	0.785549	1	0	0
cg02129127	0.0684761	0.741426	0.670715	0.819592	4.91e-09	-0.137184	0.130053	0.291503	0.87181	1	0	0
cg02112621	0.0551716	0.72415	0.64993	0.806846	4.91e-09	0.134316	0.126283	0.287503	1.14375	0	0	0
cg01682111	0.0696511	0.665349	0.580447	0.76267	4.92e-09	-0.437214	0.150642	0.00370377	0.645833	1	1	1
cg18571412	0.0593219	0.70681	0.629228	0.793959	4.94e-09	-0.0799088	0.119943	0.50527	0.923201	1	0	0
cg22095582	0.0614481	0.698121	0.618908	0.787472	4.97e-09	-0.329603	0.129044	0.0106434	0.719209	1	1	1
cg15827285	0.0578691	0.712888	0.636448	0.798509	4.97e-09	-0.281258	0.121097	0.0202015	0.754834	1	1	1
cg26073844	0.072813	0.653232	0.566355	0.753435	4.97e-09	-0.260394	0.134058	0.0520889	0.770748	1	0	0
cg22451100	0.0564668	0.718777	0.643472	0.802895	4.98e-09	-0.0778827	0.120526	0.518157	0.925073	1	0	0
cg07910552	0.0555736	0.722542	0.647976	0.805689	4.98e-09	-0.0662924	0.12291	0.589641	0.935857	1	0	0
cg09070415	0.0626743	0.69316	0.613034	0.783757	4.99e-09	-0.187185	0.119772	0.118091	0.829291	1	0	0
cg22356198	0.0361298	1.23521	1.15077	1.32585	5.01e-09	-0.209057	0.146669	0.15405	0.811349	0	0	0
cg11851129	0.0620265	0.695835	0.616182	0.785784	5.02e-09	0.0588443	0.129012	0.648306	1.06061	0	0	0
cg03268012	0.0589638	0.708429	0.631112	0.795219	5.03e-09	-0.0217912	0.121589	0.857765	0.978445	1	0	0
cg12113984	0.0506558	1.34463	1.21755	1.48499	5.04e-09	-0.0499166	0.131395	0.704021	0.951309	0	0	0
cg23104592	0.0661181	0.679431	0.59685	0.773437	5.05e-09	0.187969	0.129739	0.147386	1.2068	0	0	0
cg01053714	0.0548463	0.725752	0.651783	0.808116	5.08e-09	-0.0367813	0.11701	0.753261	0.963887	1	0	0
cg07103093	0.0510562	1.34765	1.21932	1.48949	5.1e-09	0.045232	0.127081	0.721894	1.04627	1	0	0
cg05734722	0.0953618	0.572814	0.475162	0.690535	5.13e-09	-0.121736	0.137105	0.374596	0.885382	1	0	0
cg04570735	0.0608376	0.700872	0.62209	0.78963	5.15e-09	-0.0171426	0.141474	0.903555	0.983004	1	0	0
cg14839501	0.0438327	0.661652	0.576038	0.75999	5.16e-09	-0.419782	0.149531	0.0049955	0.65719	1	1	1
cg09305680	0.0796644	0.627882	0.537115	0.733987	5.16e-09	-0.323741	0.142932	0.0235123	0.723438	1	1	1
cg19420129	0.0706982	0.682652	0.600582	0.775937	5.16e-09	-0.044045	0.133072	0.740655	0.956911	1	0	0
cg07040338	0.0653511	0.774085	0.710359	0.843527	5.16e-09	0.107872	0.116461	0.354318	1.1139	0	0	0
cg09227150	0.0567494	1.41099	1.25703	1.58381	5.21e-09	0.120706	0.127986	0.345621	1.12829	1	0	0
cg04243822	0.0589507	0.717892	0.642324	0.802351	5.21e-09	0.00799692	0.12118	0.947384	1.00803	0	0	0
cg08882099	0.054728	0.726435	0.652548	0.808689	5.22e-09	-0.147065	0.114426	0.198709	0.863238	1	0	0
cg11380051	0.0473506	0.75843	0.691211	0.832186	5.23e-09	-0.253532	0.106974	0.0177866	0.776055	1	1	1
cg06441398	0.0592811	0.707409	0.629811	0.794567	5.25e-09	-0.101877	0.134134	0.447545	0.903141	1	0	0
cg20291363	0.0595811	0.706223	0.628386	0.793702	5.29e-09	-0.187522	0.121768	0.123563	0.829011	1	0	0
cg06151165	0.0627305	1.44225	1.27539	1.63093	5.29e-09	-0.0386323	0.132543	0.770692	0.962104	0	0	0
cg09247061	0.0642885	0.68689	0.605509	0.779207	5.3e-09	-0.338271	0.120731	0.0050809	0.713002	1	1	1
cg19512969	0.0643398	0.713088	0.636553	0.798824	5.3e-09	-0.165576	0.120243	0.168507	0.847405	1	0	0
cg00267694	0.0579278	0.687094	0.605751	0.779361	5.3e-09	0.0424621	0.125047	0.73418	1.04338	0	0	0
cg27627821	0.0527321	0.735063	0.662886	0.815098	5.31e-09	-0.0502582	0.12643	0.690985	0.950984	1	0	0
cg15991207	0.0599086	0.704972	0.62687	0.792805	5.36e-09	-0.0612389	0.126074	0.627153	0.940599	1	0	0
cg04147940	0.0672853	0.675355	0.591915	0.770559	5.42e-09	0.210688	0.131999	0.110459	1.23453	0	0	0
cg08424446	0.0671728	0.754696	0.686591	0.829556	5.46e-09	-0.0852658	0.14699	0.561862	0.918268	1	0	0
cg05939082	0.0482539	0.675849	0.592478	0.770952	5.46e-09	-0.0559598	0.123298	0.64993	0.945577	1	0	0
cg02450004	0.0431106	1.28586	1.18168	1.39923	5.47e-09	-0.155664	0.142216	0.273709	0.855846	0	0	0
cg06128142	0.0557977	0.722249	0.647429	0.805716	5.49e-09	-0.086852	0.124981	0.487103	0.916813	1	0	0
cg06111140	0.0552719	0.72573	0.651594	0.808301	5.51e-09	-0.30903	0.117919	0.00877515	0.734158	1	1	1
cg02386916	0.0549787	0.724485	0.650103	0.807378	5.51e-09	-0.138951	0.124054	0.262678	0.87027	1	0	0
cg13925163	0.0524158	0.736671	0.664748	0.816376	5.52e-09	-0.377618	0.118928	0.00149739	0.685492	1	1	1
cg05731870	0.0531831	1.36354	1.22856	1.51334	5.53e-09	0.0563611	0.123877	0.649127	1.05798	1	0	0
cg01153613	0.0610103	0.700672	0.621703	0.789673	5.53e-09	-0.0356198	0.120188	0.76695	0.965007	1	0	0
cg18008221	0.0600594	0.723653	0.649088	0.806784	5.55e-09	-0.184785	0.112103	0.0992802	0.831283	1	0	0
cg01450807	0.0554825	0.704588	0.626344	0.792607	5.55e-09	-0.134868	0.117022	0.249118	0.873831	1	0	0
cg04167819	0.0623811	0.695155	0.615153	0.785563	5.58e-09	-0.106105	0.116409	0.36204	0.89933	1	0	0
cg00572560	0.0630708	0.692374	0.611864	0.783478	5.58e-09	-0.0906856	0.12999	0.485406	0.913305	1	0	0
cg09713758	0.0505056	0.744988	0.674775	0.822507	5.58e-09	-0.0158812	0.128059	0.901303	0.984244	1	0	0
cg05241355	0.0598925	1.41777	1.26074	1.59436	5.59e-09	0.0117572	0.134643	0.930416	1.01183	1	0	0
cg07546139	0.051188	1.47448	1.29397	1.68017	5.61e-09	0.343749	0.132178	0.00930494	1.41022	1	1	1
cg00564212	0.0666284	0.742058	0.671223	0.820369	5.61e-09	-0.00740472	0.117441	0.949726	0.992623	1	0	0
cg08106973	0.0346133	0.682324	0.600009	0.775932	5.62e-09	-0.116274	0.119873	0.332059	0.890231	1	0	0
cg24777065	0.065593	1.2235	1.14325	1.30938	5.62e-09	-0.243868	0.152568	0.109949	0.783591	0	0	0
cg04923840	0.0596585	0.70642	0.628466	0.794044	5.69e-09	-0.0218782	0.119069	0.854215	0.978359	1	0	0
cg01711344	0.0620319	0.696733	0.616971	0.786807	5.7e-09	-0.247752	0.128797	0.0544056	0.780553	1	0	0
cg08270567	0.0521791	0.737926	0.66619	0.817388	5.73e-09	-0.157329	0.12139	0.194955	0.854423	1	0	0
cg26841040	0.0630221	0.692778	0.612279	0.78386	5.74e-09	-0.176665	0.120801	0.14362	0.838061	1	0	0
cg24375218	0.0648303	0.685533	0.603733	0.778416	5.75e-09	0.037069	0.122763	0.762686	1.03776	0	0	0
cg04225088	0.0598502	0.705711	0.627599	0.793545	5.76e-09	-0.176264	0.115981	0.128568	0.838396	1	0	0
cg04285710	0.0676064	0.681461	0.598937	0.775356	5.77e-09	-0.132965	0.132424	0.315339	0.875496	1	0	0
cg03517776	0.0658597	0.674564	0.590849	0.77014	5.77e-09	0.16174	0.117689	0.16935	1.17555	0	0	0
cg17220584	0.0476285	0.757794	0.690255	0.831941	5.78e-09	-0.0487858	0.123771	0.693461	0.952385	1	0	0
cg21301942	0.0550058	1.37754	1.23676	1.53436	5.78e-09	-0.053336	0.122284	0.662717	0.948061	0	0	0
cg14483391	0.0579889	0.713441	0.636793	0.799316	5.79e-09	-0.156394	0.124948	0.210688	0.855222	1	0	0
cg05135644	0.0598839	1.41713	1.2602	1.59362	5.82e-09	-0.100319	0.131509	0.445563	0.904549	0	0	0
cg15269394	0.0599345	0.705449	0.627263	0.793381	5.83e-09	-0.360207	0.129881	0.00554811	0.697532	1	1	1
cg03598074	0.0584893	0.711419	0.634365	0.797832	5.83e-09	-0.0924681	0.122255	0.449436	0.911678	1	0	0
cg20430841	0.0594037	0.707656	0.62988	0.795036	5.85e-09	0.199135	0.120916	0.0995819	1.22035	0	0	0
cg06382664	0.060679	0.702457	0.623691	0.79117	5.87e-09	0.0502441	0.131158	0.701659	1.05153	0	0	0
cg00226984	0.0631496	0.692478	0.611862	0.783717	5.91e-09	-0.298133	0.118962	0.0122061	0.742202	1	1	1
cg13847987	0.0693407	0.715504	0.639209	0.800907	5.92e-09	-0.0927428	0.124381	0.455889	0.911428	1	0	0
cg08462372	0.0575302	1.49705	1.30681	1.71498	5.92e-09	-0.160382	0.106059	0.130482	0.851818	0	0	0
cg20694964	0.0551156	0.725663	0.651359	0.808443	5.95e-09	-0.0571333	0.123654	0.644052	0.944468	1	0	0
cg14051973	0.0503641	0.746009	0.675887	0.823406	5.96e-09	-0.178252	0.114423	0.119272	0.836731	1	0	0
cg18734433	0.0579347	0.713868	0.637241	0.799709	5.96e-09	-0.117681	0.127347	0.355439	0.88898	1	0	0
cg01149239	0.0603589	0.703749	0.625191	0.792179	5.97e-09	-0.13028	0.120285	0.278764	0.877849	1	0	0
cg13081014	0.0603916	1.48305	1.29865	1.69363	5.97e-09	-0.0500126	0.122206	0.682357	0.951217	0	0	0
cg00945234	0.0677432	1.4207	1.26219	1.59912	5.97e-09	-0.0112681	0.134608	0.933287	0.988795	0	0	0
cg18947209	0.0580942	0.713262	0.636502	0.79928	6.01e-09	-0.0480461	0.123777	0.697892	0.95309	1	0	0
cg16434940	0.0448914	0.77021	0.705339	0.841048	6.02e-09	-0.243421	0.124588	0.0507247	0.783942	1	0	0
cg26065247	0.0459617	0.685476	0.603563	0.778507	6.03e-09	-0.26364	0.122988	0.0320634	0.76825	1	1	1
cg23118464	0.0649318	1.30645	1.1939	1.4296	6.03e-09	0.052981	0.111942	0.636008	1.05441	1	0	0
cg23259394	0.0614803	0.699382	0.619986	0.788944	6.03e-09	-0.0527953	0.119803	0.659441	0.948574	1	0	0
cg04673737	0.058592	0.711239	0.634077	0.797791	6.04e-09	-0.174266	0.124709	0.1623	0.840073	1	0	0
cg03559454	0.0570102	1.39308	1.24581	1.55777	6.06e-09	0.33484	0.134582	0.0128463	1.39772	1	1	1
cg06266100	0.0581931	0.712967	0.636114	0.799104	6.11e-09	-0.0508208	0.131973	0.700174	0.950449	1	0	0
cg03032512	0.0672277	0.67654	0.59302	0.771824	6.15e-09	-0.0250272	0.124247	0.840362	0.975283	1	0	0
cg23130254	0.0624034	1.43719	1.27174	1.62417	6.17e-09	0.165759	0.137424	0.227745	1.18029	1	0	0
cg21658515	0.0470553	0.760739	0.693717	0.834237	6.19e-09	-0.0799061	0.120817	0.508368	0.923203	1	0	0
cg00856204	0.0356699	1.23033	1.14726	1.31942	6.2e-09	0.129326	0.128997	0.316076	1.13806	1	0	0
cg13101330	0.0638958	0.689884	0.608678	0.781923	6.25e-09	-0.0393136	0.122538	0.74834	0.961449	1	0	0
cg00585116	0.0677118	0.674768	0.590905	0.770532	6.26e-09	-0.130683	0.128169	0.307913	0.877496	1	0	0
cg24859158	0.0652911	0.684391	0.602183	0.777822	6.31e-09	-0.0632545	0.130695	0.628397	0.938705	1	0	0
cg03781727	0.0742771	0.649651	0.561637	0.751458	6.36e-09	0.0245231	0.121115	0.839543	1.02483	0	0	0
cg07734161	0.0514672	0.684816	0.602662	0.778169	6.37e-09	-0.340532	0.134334	0.0112457	0.711392	1	1	1
cg04337056	0.065202	0.741666	0.670501	0.820384	6.37e-09	-0.214967	0.121304	0.0763719	0.806568	1	0	0
cg19684083	0.042723	0.780303	0.717624	0.848455	6.38e-09	-0.187134	0.119403	0.117056	0.829332	1	0	0
cg12873903	0.054551	0.728522	0.654649	0.810731	6.39e-09	-0.0806894	0.114818	0.482207	0.92248	1	0	0
cg04233230	0.0584086	0.712395	0.635336	0.798801	6.4e-09	-0.36429	0.127461	0.00426263	0.69469	1	1	1
cg17656608	0.0592205	0.709056	0.631352	0.796323	6.41e-09	-0.148105	0.117692	0.208241	0.86234	1	0	0
cg19961043	0.053339	1.36298	1.22769	1.51318	6.41e-09	-0.0654237	0.142797	0.646839	0.936671	0	0	0
cg15403900	0.0605447	0.703638	0.624904	0.792291	6.42e-09	-0.263845	0.142276	0.0636747	0.768093	1	0	0
cg20234976	0.0619856	1.4331	1.26915	1.61822	6.43e-09	0.0924682	0.124094	0.456183	1.09688	1	0	0
cg23384093	0.0488333	1.32774	1.20656	1.4611	6.43e-09	0.037453	0.12443	0.763416	1.03816	1	0	0
cg15028128	0.042755	0.780242	0.717523	0.848442	6.47e-09	-0.149002	0.112023	0.183486	0.861567	1	0	0
cg10943921	0.0581574	0.713521	0.636653	0.799669	6.48e-09	-0.142147	0.116067	0.220691	0.867494	1	0	0
cg18080532	0.0478804	0.757399	0.689555	0.831918	6.5e-09	-0.0965697	0.11723	0.410074	0.907947	1	0	0
cg05475277	0.0530255	0.73513	0.662566	0.815642	6.51e-09	-0.228313	0.119278	0.0556036	0.795875	1	0	0
cg15924102	0.0491604	0.773781	0.709574	0.843797	6.52e-09	-0.0399127	0.129589	0.758085	0.960873	1	0	0
cg18145026	0.0441964	0.751807	0.682749	0.82785	6.52e-09	-0.0135767	0.129807	0.916701	0.986515	1	0	0
cg23095243	0.0367859	0.687745	0.606051	0.78045	6.55e-09	-0.325698	0.126925	0.0102857	0.722023	1	1	1
cg14503180	0.0645181	1.23793	1.15181	1.33047	6.55e-09	-0.220286	0.149605	0.140898	0.802289	0	0	0
cg05036212	0.067514	1.47949	1.29612	1.68881	6.56e-09	0.0926249	0.124811	0.458013	1.09705	1	0	0
cg08230177	0.0521807	1.35355	1.22196	1.4993	6.57e-09	0.142538	0.126157	0.258543	1.1532	1	0	0
cg20608990	0.0634933	0.691876	0.610918	0.783563	6.58e-09	0.156894	0.120509	0.192942	1.16987	0	0	0
cg06907418	0.0535949	1.36464	1.22856	1.51578	6.6e-09	0.20516	0.124762	0.100091	1.22772	1	0	0
cg27608224	0.0558673	0.723245	0.648233	0.806938	6.65e-09	-0.0229355	0.12187	0.850723	0.977325	1	0	0
cg24688854	0.052879	0.735897	0.663447	0.816258	6.66e-09	-0.114747	0.126635	0.364873	0.891592	1	0	0
cg04678141	0.0554731	0.724918	0.650235	0.808179	6.67e-09	-0.5579	0.113287	8.45e-07	0.57241	1	1	1
cg26514793	0.0606996	0.703278	0.624395	0.792127	6.67e-09	-0.143676	0.125396	0.251884	0.866168	1	0	0
cg05170132	0.058311	0.70252	0.623491	0.791567	6.68e-09	-0.0609826	0.131803	0.643594	0.94084	1	0	0
cg24121168	0.060889	0.713097	0.636083	0.799435	6.68e-09	0.0295516	0.118812	0.803573	1.02999	0	0	0
cg17315383	0.0551902	0.762955	0.696275	0.836022	6.7e-09	-0.168773	0.125264	0.177869	0.8447	1	0	0
cg18918116	0.0466617	0.726144	0.651695	0.809097	6.7e-09	0.0225872	0.122519	0.853734	1.02284	0	0	0
cg03853743	0.0514977	0.741898	0.67067	0.820689	6.74e-09	-0.210191	0.120709	0.08163	0.810429	1	0	0
cg22132508	0.0542131	1.46737	1.28894	1.67051	6.75e-09	0.126166	0.141896	0.373924	1.13447	1	0	0
cg18995042	0.066151	0.730314	0.656694	0.812186	6.75e-09	-0.097383	0.117476	0.407125	0.907208	1	0	0
cg23523388	0.056608	0.720287	0.644645	0.804804	6.79e-09	-0.0922726	0.118804	0.437348	0.911857	1	0	0
cg19375537	0.0703141	1.50307	1.30957	1.72517	6.81e-09	0.0455398	0.133071	0.732184	1.04659	1	0	0
cg20345923	0.0616887	0.699432	0.619778	0.789324	6.83e-09	-0.0544569	0.114145	0.633302	0.946999	1	0	0
cg26796443	0.0605296	0.704151	0.625378	0.792846	6.84e-09	-0.310235	0.129778	0.016825	0.733275	1	1	1
cg01538998	0.0795795	0.630557	0.539493	0.736992	6.84e-09	-0.0934216	0.141007	0.507629	0.910809	1	0	0
cg09274827	0.0617671	0.699148	0.619431	0.789124	6.86e-09	0.00631322	0.129188	0.961024	1.00633	0	0	0
cg04855678	0.0608188	0.703044	0.624042	0.792049	6.91e-09	-0.299113	0.127504	0.0189807	0.741476	1	1	1
cg08023442	0.0568155	0.719552	0.643725	0.80431	6.92e-09	-0.278738	0.115257	0.0155893	0.756738	1	1	1
cg16751623	0.0414556	1.27143	1.17221	1.37905	6.92e-09	-0.387919	0.168754	0.0215208	0.678467	0	1	0
cg06884401	0.0536707	0.636884	0.546718	0.741921	6.93e-09	-0.333156	0.136038	0.014326	0.716658	1	1	1
cg19659680	0.0778867	0.732788	0.65962	0.814072	6.93e-09	-0.0140403	0.12665	0.911729	0.986058	1	0	0
cg03977174	0.0536462	0.732953	0.659801	0.814217	6.99e-09	-0.203854	0.115029	0.0763603	0.815581	1	0	0
cg11580212	0.0466235	0.763398	0.69673	0.836444	7.02e-09	0.111159	0.125939	0.377432	1.11757	0	0	0
cg02087985	0.0637697	0.691257	0.61004	0.783286	7.03e-09	-0.210772	0.126064	0.094536	0.809959	1	0	0
cg07595291	0.0412582	1.2698	1.17116	1.37674	7.07e-09	-0.101707	0.149195	0.495426	0.903294	0	0	0
cg20691608	0.059411	0.708985	0.631053	0.79654	7.09e-09	-0.104353	0.124993	0.403791	0.900907	1	0	0
cg17736840	0.0522103	0.739193	0.667293	0.818841	7.12e-09	0.186429	0.14311	0.192678	1.20494	0	0	0
cg22982368	0.0586606	1.40425	1.25174	1.57535	7.14e-09	0.269453	0.134173	0.0446168	1.30925	1	1	1
cg26899156	0.0628846	0.694926	0.614343	0.786079	7.14e-09	0.145757	0.120699	0.2272	1.15692	0	0	0
cg23436042	0.0612816	0.701415	0.622031	0.79093	7.15e-09	0.0694088	0.126653	0.583676	1.07187	0	0	0
cg08235984	0.0476213	0.759123	0.691476	0.833389	7.16e-09	-0.144384	0.113409	0.202974	0.865555	1	0	0
cg18499396	0.0586315	0.712268	0.634945	0.799007	7.17e-09	-0.0919897	0.125262	0.462718	0.912115	1	0	0
cg09584118	0.0610842	0.702237	0.623001	0.79155	7.17e-09	0.122453	0.120101	0.307928	1.13027	0	0	0
cg10628201	0.0524975	0.738032	0.66587	0.818015	7.19e-09	-0.0478759	0.115583	0.678719	0.953252	1	0	0
cg03380809	0.0573112	0.717788	0.641524	0.803119	7.23e-09	-0.104297	0.122678	0.395231	0.900957	1	0	0
cg09575472	0.0621698	0.697907	0.617844	0.788345	7.24e-09	-0.0677335	0.123703	0.584	0.934509	1	0	0
cg11287647	0.0644308	0.688962	0.607227	0.781697	7.36e-09	-0.0989988	0.125419	0.429909	0.905744	1	0	0
cg00543474	0.060086	0.667974	0.582585	0.76588	7.37e-09	-0.00502214	0.12289	0.967402	0.99499	1	0	0
cg02026062	0.0697846	1.41542	1.25818	1.59233	7.37e-09	-0.0219721	0.127993	0.8637	0.978268	0	0	0
cg10074290	0.0516701	0.741736	0.670298	0.820788	7.38e-09	-0.0935039	0.125749	0.457133	0.910734	1	0	0
cg22802461	0.0584574	0.713211	0.636003	0.799792	7.4e-09	-0.0953741	0.124153	0.44237	0.909033	1	0	0
cg03879320	0.0528285	0.736827	0.664351	0.817209	7.42e-09	-0.0268723	0.130226	0.836516	0.973486	1	0	0
cg02976723	0.0592637	0.709926	0.632073	0.797367	7.43e-09	-0.0535295	0.122109	0.661116	0.947878	1	0	0
cg13971025	0.0547428	0.728749	0.654607	0.811288	7.46e-09	-0.28871	0.113162	0.0107323	0.749229	1	1	1
cg05513983	0.0487583	1.32554	1.20473	1.45846	7.47e-09	-0.0238295	0.129516	0.854022	0.976452	0	0	0
cg06616081	0.0592152	0.710168	0.632349	0.797563	7.48e-09	-0.424556	0.117608	0.0003063	0.65406	1	1	1
cg06854842	0.0697127	0.668367	0.58301	0.766222	7.48e-09	-0.2573	0.12908	0.0462251	0.773137	1	1	1
cg01224366	0.0509049	1.34204	1.21461	1.48285	7.5e-09	-0.0233876	0.123102	0.84932	0.976884	0	0	0
cg01235659	0.0578862	0.715674	0.638914	0.801656	7.51e-09	-0.0562972	0.128184	0.660523	0.945258	1	0	0
cg08909592	0.0479148	0.758145	0.690187	0.832793	7.53e-09	0.00796412	0.112949	0.943787	1.008	0	0	0
cg26121810	0.0599121	0.707372	0.629	0.795509	7.54e-09	-0.226931	0.117912	0.0542828	0.796976	1	0	0
cg19667847	0.0563528	0.722118	0.646608	0.806447	7.59e-09	-0.0612429	0.124315	0.622267	0.940595	1	0	0
cg11895835	0.0712139	0.662714	0.57638	0.76198	7.6e-09	-0.0649935	0.136191	0.633202	0.937074	1	0	0
cg04656424	0.0627198	0.696106	0.615585	0.787159	7.66e-09	-0.267371	0.127042	0.035327	0.765389	1	1	1
cg11007153	0.0460007	0.766689	0.700589	0.839026	7.68e-09	-0.0146278	0.113539	0.897488	0.985479	1	0	0
cg25215194	0.0546728	0.729247	0.655145	0.811732	7.69e-09	-0.273519	0.113455	0.0159165	0.760698	1	1	1
cg22374213	0.054679	0.72925	0.655139	0.811745	7.72e-09	0.0545281	0.1323	0.680225	1.05604	0	0	0
cg07043604	0.0582038	0.714568	0.63753	0.800916	7.73e-09	-0.0912543	0.126847	0.47189	0.912786	1	0	0
cg13284614	0.0565587	0.701359	0.621789	0.79111	7.75e-09	-0.27709	0.116538	0.0174217	0.757986	1	1	1
cg24746938	0.0637039	0.721401	0.645705	0.805971	7.75e-09	-0.274148	0.121515	0.0240658	0.76022	1	1	1
cg03837909	0.0614391	0.692246	0.610992	0.784305	7.75e-09	0.145044	0.122019	0.234555	1.15609	0	0	0
cg03870329	0.0534257	0.734595	0.661564	0.815688	7.78e-09	-0.101069	0.130132	0.437359	0.903871	1	0	0
cg17214381	0.0655896	1.46028	1.28412	1.66061	7.8e-09	-0.0391223	0.123552	0.751512	0.961633	0	0	0
cg00196827	0.0580517	1.39808	1.24772	1.56655	7.81e-09	0.0635209	0.128812	0.621922	1.06558	1	0	0
cg19167230	0.0626994	0.696344	0.61582	0.787397	7.83e-09	-0.357252	0.128095	0.00528783	0.699596	1	1	1
cg07875786	0.0723444	0.658649	0.571576	0.758986	7.84e-09	0.0176638	0.132255	0.893751	1.01782	0	0	0
cg25388861	0.0584927	0.713477	0.636196	0.800145	7.85e-09	-0.0207492	0.125177	0.868347	0.979465	1	0	0
cg27005749	0.0582054	0.714675	0.637624	0.801038	7.86e-09	-0.198549	0.125755	0.114369	0.81992	1	0	0
cg01211283	0.0532063	1.35943	1.2248	1.50884	7.87e-09	0.170896	0.128162	0.182388	1.18637	1	0	0
cg16578549	0.0553082	0.7268	0.652133	0.810015	7.95e-09	-0.272633	0.117508	0.0203338	0.761372	1	1	1
cg20901882	0.0585748	0.713235	0.635878	0.800003	7.95e-09	-0.291584	0.129843	0.0247261	0.74708	1	1	1
cg24146685	0.0519002	1.31455	1.19788	1.44259	8.04e-09	-0.182851	0.144337	0.205215	0.832892	0	0	0
cg27574973	0.04742	0.741304	0.669605	0.82068	8.04e-09	0.133956	0.126812	0.290817	1.14334	0	0	0
cg10526659	0.0533152	1.3599	1.22497	1.5097	8.12e-09	0.0826883	0.12664	0.513796	1.0862	1	0	0
cg17944372	0.0500331	0.749406	0.679405	0.826619	8.13e-09	-0.31822	0.106377	0.00277661	0.727442	1	1	1
cg01081883	0.0426423	1.27871	1.17618	1.39018	8.14e-09	0.00194584	0.128424	0.987911	1.00195	1	0	0
cg11118690	0.0576893	0.716521	0.639751	0.802505	8.16e-09	-0.347046	0.127206	0.00636755	0.706773	1	1	1
cg19122901	0.0578223	1.39456	1.24547	1.5615	8.16e-09	0.108778	0.13428	0.417895	1.11491	1	0	0
cg22497741	0.0542671	1.36715	1.2292	1.52057	8.28e-09	0.283643	0.124985	0.023243	1.32796	1	1	1
cg07053162	0.054624	0.729954	0.655842	0.81244	8.28e-09	-0.192004	0.114941	0.0948296	0.825303	1	0	0
cg06384865	0.0476175	0.760075	0.692348	0.834427	8.35e-09	-0.0688903	0.125593	0.583333	0.933429	1	0	0
cg23164218	0.0557371	0.725353	0.650288	0.809083	8.37e-09	-0.258951	0.127133	0.0416655	0.771861	1	1	1
cg00643111	0.0451003	1.29667	1.18697	1.41651	8.38e-09	-0.229214	0.149388	0.124942	0.795158	0	0	0
cg06259934	0.0517256	0.712198	0.634514	0.799393	8.43e-09	-0.244451	0.124363	0.0493416	0.783134	1	1	1
cg24629122	0.0589279	1.34706	1.21719	1.49079	8.43e-09	0.244692	0.125897	0.051945	1.27723	1	0	0
cg20842782	0.0406935	0.791084	0.73044	0.856764	8.46e-09	0.0486187	0.128498	0.705162	1.04982	0	0	0
cg21248405	0.0621566	0.684369	0.601494	0.778661	8.47e-09	-0.12437	0.123102	0.312353	0.883053	1	0	0
cg00170003	0.065858	1.4304	1.26633	1.61571	8.47e-09	-0.134568	0.131295	0.305396	0.874094	0	0	0
cg01292722	0.0592909	0.710749	0.632773	0.798335	8.48e-09	-0.410027	0.123775	0.000924031	0.663632	1	1	1
cg06834507	0.0615254	0.701686	0.621974	0.791614	8.51e-09	0.101038	0.133473	0.449054	1.10632	0	0	0
cg14670092	0.0615791	0.701524	0.621765	0.791515	8.57e-09	-0.142683	0.115335	0.216041	0.867029	1	0	0
cg04190875	0.0633515	1.43991	1.27178	1.63027	8.67e-09	0.126982	0.136508	0.352258	1.1354	1	0	0
cg04609307	0.0348781	1.22227	1.14151	1.30875	8.68e-09	-0.390025	0.19256	0.0428186	0.67704	0	1	0
cg27247252	0.0599906	0.708145	0.62959	0.796501	8.78e-09	-0.0583768	0.120465	0.627963	0.943294	1	0	0
cg10103387	0.0541995	0.732185	0.658395	0.814246	8.85e-09	-0.0896082	0.129063	0.487495	0.914289	1	0	0
cg20667684	0.062578	0.697783	0.61724	0.788836	8.9e-09	-0.323661	0.127985	0.0114423	0.723495	1	1	1
cg06662132	0.0428456	1.27935	1.1763	1.39142	8.94e-09	0.114298	0.122334	0.350141	1.12109	1	0	0
cg09019592	0.0594992	0.710281	0.632098	0.798134	8.95e-09	-0.215156	0.124185	0.0831778	0.806416	1	0	0
cg18087256	0.0478655	0.759417	0.691413	0.834111	8.95e-09	0.18029	0.137953	0.191248	1.19757	0	0	0
cg01066157	0.0558751	0.725253	0.650023	0.80919	8.97e-09	0.0885015	0.122154	0.468754	1.09254	0	0	0
cg08245249	0.0466679	0.764713	0.697871	0.837958	9.02e-09	0.130152	0.127251	0.306406	1.139	0	0	0
cg14399183	0.0605908	0.70593	0.626884	0.794945	9.06e-09	-0.226064	0.130605	0.0834705	0.797667	1	0	0
cg16647844	0.0838961	0.617483	0.523856	0.727842	9.11e-09	-0.44144	0.14878	0.00300662	0.64311	1	1	1
cg16814416	0.0619149	0.70064	0.620573	0.791037	9.14e-09	-0.214064	0.120256	0.0750647	0.807296	1	0	0
cg04920416	0.0527987	0.738369	0.665781	0.818872	9.21e-09	-0.00479068	0.119438	0.968005	0.995221	1	0	0
cg26224173	0.051913	0.742143	0.670346	0.821629	9.22e-09	-0.132133	0.112551	0.240402	0.876224	1	0	0
cg18040974	0.0522117	0.740882	0.668816	0.820714	9.24e-09	-0.141672	0.114141	0.214532	0.867906	1	0	0
cg07134632	0.0721926	0.73382	0.660276	0.815556	9.25e-09	-0.0529343	0.117288	0.651759	0.948442	1	0	0
cg02516189	0.0538816	0.660559	0.573405	0.760961	9.25e-09	-0.0317866	0.120114	0.791289	0.968713	1	0	0
cg12072587	0.0562421	0.751935	0.68222	0.828774	9.29e-09	-0.316166	0.105487	0.00272455	0.728938	1	1	1
cg26546912	0.0496426	0.723968	0.648404	0.808338	9.29e-09	-0.207775	0.121338	0.0868299	0.81239	1	0	0
cg05845831	0.0667495	0.681598	0.598014	0.776865	9.32e-09	-0.30922	0.131227	0.0184544	0.734019	1	1	1
cg09523601	0.0460144	0.767799	0.701584	0.840262	9.34e-09	-0.0872802	0.126968	0.491819	0.91642	1	0	0
cg17929273	0.052618	0.739239	0.666801	0.819546	9.35e-09	-0.0178832	0.118899	0.880444	0.982276	1	0	0
cg00727673	0.0692961	0.671738	0.586428	0.769458	9.37e-09	-0.0226849	0.133419	0.864988	0.977571	1	0	0
cg04299274	0.0586807	0.686808	0.604141	0.780787	9.37e-09	0.0887527	0.122355	0.468226	1.09281	0	0	0
cg06950346	0.0654338	0.71396	0.636392	0.800983	9.37e-09	0.00750374	0.123434	0.951525	1.00753	0	0	0
cg25913353	0.0490071	0.754747	0.685624	0.830838	9.39e-09	0.07053	0.118999	0.553386	1.07308	0	0	0
cg18351329	0.0603983	1.41448	1.25657	1.59224	9.4e-09	-0.0260762	0.131238	0.842502	0.974261	0	0	0
cg03462699	0.0514519	1.34365	1.21476	1.48622	9.41e-09	-0.0394265	0.144609	0.785129	0.961341	0	0	0
cg24280645	0.0395604	1.25497	1.16134	1.35615	9.42e-09	-0.0877701	0.131283	0.503778	0.915971	0	0	0
cg00647859	0.0588875	0.713153	0.635416	0.800402	9.43e-09	-0.196645	0.119201	0.0990061	0.821482	1	0	0
cg17263323	0.0508158	0.746979	0.676167	0.825207	9.43e-09	-0.0487715	0.123582	0.693101	0.952399	1	0	0
cg22290648	0.0654736	1.45616	1.28079	1.65555	9.48e-09	-0.235895	0.133381	0.0769635	0.789864	0	0	0
cg00731304	0.0609919	0.704679	0.62528	0.794159	9.54e-09	-0.0894222	0.122315	0.464731	0.914459	1	0	0
cg13479215	0.0553889	0.727725	0.65286	0.811175	9.57e-09	-0.0867011	0.116498	0.456738	0.916951	1	0	0
cg22910862	0.0568974	0.721488	0.645354	0.806604	9.62e-09	0.111535	0.127232	0.380687	1.11799	0	0	0
cg25352940	0.0801076	0.631546	0.539781	0.738912	9.63e-09	0.00431322	0.129074	0.973342	1.00432	0	0	0
cg12830951	0.0497611	0.751681	0.681831	0.828686	9.68e-09	-0.171359	0.116558	0.141518	0.842519	1	0	0
cg19138865	0.0575545	0.718827	0.642146	0.804664	9.69e-09	-0.230328	0.125241	0.0659036	0.794273	1	0	0
cg15412682	0.0550303	0.729313	0.654745	0.812374	9.7e-09	-0.159455	0.126901	0.208924	0.852608	1	0	0
cg06248767	0.0593263	1.40534	1.25108	1.57863	9.71e-09	0.200708	0.130658	0.124505	1.22227	1	0	0
cg10296062	0.067215	0.68011	0.596164	0.775877	9.73e-09	0.0600023	0.120498	0.618517	1.06184	0	0	0
cg26062204	0.0591511	0.712365	0.634385	0.79993	9.82e-09	-0.0182287	0.128004	0.886758	0.981936	1	0	0
cg13444151	0.0514135	0.744742	0.673353	0.8237	9.91e-09	-0.0855387	0.10799	0.428302	0.918018	1	0	0
cg22079685	0.0521534	0.741609	0.669549	0.821426	9.94e-09	0.0920642	0.124498	0.459612	1.09644	0	0	0
cg18805612	0.0775325	1.5595	1.33964	1.81544	9.96e-09	0.150045	0.127282	0.238463	1.16189	1	0	0
cg06300254	0.0641894	1.44465	1.27387	1.63833	9.98e-09	0.0991743	0.132546	0.454325	1.10426	1	0	0
cg22399703	0.0578784	0.652147	0.563436	0.754826	1e-08	-0.201182	0.125764	0.109671	0.817764	1	0	0
cg03079640	0.0566757	0.722692	0.646711	0.807598	1e-08	-0.100436	0.117014	0.390714	0.904443	1	0	0
cg24465935	0.0746018	0.717716	0.640747	0.803931	1e-08	0.151624	0.128941	0.239628	1.16372	0	0	0
cg20796999	0.0331123	0.750058	0.679766	0.827619	1.01e-08	-0.117472	0.118494	0.321503	0.889166	1	0	0
cg16248432	0.0544972	0.731841	0.657701	0.814338	1.01e-08	-0.0264954	0.121381	0.827208	0.973853	1	0	0
cg16393726	0.0502061	1.20888	1.13292	1.28994	1.01e-08	-0.234941	0.15338	0.125583	0.790617	0	0	0
cg20170533	0.0638901	1.44192	1.27221	1.63428	1.01e-08	-0.0415783	0.133062	0.754682	0.959274	0	0	0
cg26403223	0.0624856	0.684724	0.601483	0.779485	1.02e-08	-0.231345	0.122857	0.0596953	0.793466	1	0	0
cg18631301	0.0560545	0.699138	0.61855	0.790225	1.02e-08	-0.218603	0.12345	0.0765964	0.803641	1	0	0
cg16748524	0.049225	0.730978	0.656637	0.813735	1.02e-08	-0.189875	0.121656	0.118584	0.827063	1	0	0
cg06129712	0.0661328	0.725391	0.649918	0.809629	1.02e-08	0.180306	0.131214	0.169399	1.19758	0	0	0
cg01225525	0.0547215	0.754332	0.684955	0.830736	1.02e-08	0.0666021	0.135891	0.624052	1.06887	0	0	0
cg04781584	0.0521226	1.34777	1.21688	1.49273	1.03e-08	0.281156	0.126819	0.0266245	1.32466	1	1	1
cg06148264	0.0621815	1.33689	1.2104	1.4766	1.03e-08	0.170913	0.106754	0.109377	1.18639	1	0	0
cg22887845	0.0507122	0.700442	0.620074	0.791227	1.03e-08	-0.143748	0.126726	0.256659	0.866106	1	0	0
cg09417547	0.0748573	0.733354	0.659479	0.815504	1.04e-08	-0.385617	0.117808	0.00106314	0.680031	1	1	1
cg12574576	0.0541733	0.693327	0.6116	0.785975	1.04e-08	-0.190184	0.118883	0.109651	0.826807	1	0	0
cg00238353	0.0516395	0.744104	0.672478	0.823359	1.04e-08	-0.135668	0.122545	0.268257	0.873133	1	0	0
cg12439977	0.0639926	0.651454	0.562555	0.754401	1.04e-08	0.0749718	0.124062	0.545639	1.07785	0	0	0
cg07617207	0.060444	0.707567	0.628518	0.796559	1.05e-08	-0.14669	0.119543	0.219789	0.863562	1	0	0
cg20057676	0.0615747	1.39739	1.24607	1.56708	1.05e-08	0.0664575	0.135482	0.623762	1.06872	1	0	0
cg02241397	0.0717862	1.42243	1.26072	1.60489	1.05e-08	-0.036946	0.134238	0.783141	0.963728	0	0	0
cg04453352	0.0584766	0.663126	0.576092	0.763309	1.05e-08	0.00023851	0.118317	0.998392	1.00024	0	0	0
cg05915892	0.0538339	0.720734	0.64425	0.806298	1.06e-08	-0.209748	0.123922	0.0905334	0.810788	1	0	0
cg16176855	0.0572375	0.714521	0.636787	0.801743	1.06e-08	-0.0567487	0.121002	0.639077	0.944831	1	0	0
cg03826194	0.0587645	0.734905	0.661314	0.816686	1.06e-08	0.0055602	0.119236	0.962807	1.00558	0	0	0
cg22538712	0.0643972	0.722618	0.64648	0.807722	1.07e-08	-0.356949	0.118827	0.002665	0.699808	1	1	1
cg01850245	0.0568061	0.691873	0.609834	0.784949	1.07e-08	-0.115012	0.130628	0.378614	0.891356	1	0	0
cg18121601	0.0563723	0.729806	0.65511	0.813019	1.08e-08	-0.111613	0.120064	0.352571	0.89439	1	0	0
cg06818777	0.0550904	1.38841	1.24068	1.55373	1.08e-08	0.0969439	0.131142	0.459767	1.1018	1	0	0
cg24594504	0.0555392	1.38037	1.23598	1.54162	1.08e-08	0.083054	0.133703	0.534478	1.0866	1	0	0
cg21881184	0.0573988	0.727943	0.652864	0.811657	1.08e-08	0.0134716	0.123961	0.913459	1.01356	0	0	0
cg07832203	0.0593665	0.727578	0.652403	0.811415	1.09e-08	-0.325715	0.120785	0.00700422	0.722011	1	1	1
cg13163930	0.0635624	1.43812	1.26967	1.62892	1.09e-08	0.286462	0.138428	0.0385095	1.33171	1	1	1
cg00809729	0.0543543	0.732951	0.658883	0.815344	1.09e-08	0.0854626	0.131597	0.516063	1.08922	0	0	0
cg03994465	0.0556432	1.40406	1.24983	1.57731	1.09e-08	-0.0421304	0.131696	0.74904	0.958745	0	0	0
cg05306773	0.0587341	0.714865	0.637132	0.802082	1.1e-08	-0.0765618	0.12439	0.538225	0.926296	1	0	0
cg21303039	0.0723842	0.661226	0.573768	0.762015	1.1e-08	-0.0201229	0.130629	0.877573	0.980078	1	0	0
cg26937038	0.0702921	0.669181	0.583056	0.768026	1.1e-08	0.0225378	0.126428	0.858514	1.02279	0	0	0
cg00432659	0.0549834	0.730441	0.655818	0.813555	1.11e-08	-0.058628	0.122142	0.631228	0.943057	1	0	0
cg00133811	0.0436798	0.683383	0.599699	0.778746	1.12e-08	-0.171602	0.120979	0.156063	0.842314	1	0	0
cg13144143	0.0554093	0.752819	0.682933	0.829856	1.12e-08	-0.158159	0.111741	0.15695	0.853714	1	0	0
cg06825661	0.0666486	0.728694	0.653703	0.812287	1.12e-08	-0.0146386	0.120532	0.903335	0.985468	1	0	0
cg25196881	0.0497089	0.779187	0.715256	0.848833	1.12e-08	0.157296	0.142981	0.271283	1.17034	0	0	0
cg17980404	0.0493783	1.41597	1.2566	1.59554	1.13e-08	-0.199098	0.126684	0.116041	0.819469	0	0	0
cg25007447	0.0609193	0.754325	0.684743	0.830977	1.13e-08	0.0480341	0.120673	0.690591	1.04921	0	0	0
cg08567279	0.0676873	1.47161	1.28878	1.68038	1.14e-08	0.301811	0.125507	0.0161846	1.35231	1	1	1
cg22301073	0.0598057	1.40685	1.25125	1.58182	1.14e-08	-0.0600654	0.122672	0.624387	0.941703	0	0	0
cg08478074	0.0596016	1.26203	1.16508	1.36704	1.15e-08	-0.0959763	0.139459	0.491325	0.908486	0	0	0
cg03646261	0.0407814	0.711645	0.633185	0.799828	1.15e-08	0.0661173	0.127012	0.602675	1.06835	0	0	0
cg14315198	0.0640679	0.693794	0.611922	0.78662	1.16e-08	-0.128083	0.123689	0.300424	0.87978	1	0	0
cg01505767	0.0582696	1.39438	1.24389	1.56308	1.16e-08	0.118078	0.135818	0.384636	1.12533	1	0	0
cg00875272	0.0557867	1.37546	1.23278	1.53466	1.16e-08	0.0722614	0.127392	0.570554	1.07494	1	0	0
cg10635188	0.0558779	0.7274	0.65206	0.811445	1.16e-08	0.00368412	0.124881	0.976465	1.00369	0	0	0
cg04941831	0.0543834	0.73328	0.659142	0.815758	1.17e-08	-0.362766	0.124504	0.00357182	0.695749	1	1	1
cg15579883	0.0479727	0.71718	0.639762	0.803966	1.17e-08	-0.221929	0.117573	0.0590814	0.800972	1	0	0
cg08085853	0.0582816	0.760597	0.692341	0.835582	1.17e-08	0.069895	0.118584	0.555583	1.0724	0	0	0
cg05942574	0.0583149	1.39458	1.24396	1.56344	1.17e-08	-0.0148246	0.129256	0.908689	0.985285	0	0	0
cg03515844	0.0632837	0.69705	0.615739	0.789098	1.18e-08	0.0948848	0.136251	0.486181	1.09953	0	0	0
cg18669186	0.0430299	1.37954	1.23507	1.54092	1.19e-08	0.238092	0.130445	0.0679671	1.26883	1	0	0
cg02203336	0.0592598	0.713298	0.63508	0.801148	1.19e-08	-0.170538	0.119713	0.154286	0.843211	1	0	0
cg13798986	0.0601233	0.782434	0.719151	0.851284	1.19e-08	-0.153469	0.123898	0.215467	0.857728	1	0	0
cg04556412	0.0564431	0.709817	0.630913	0.79859	1.19e-08	0.0353817	0.118677	0.765602	1.03602	0	0	0
cg16569063	0.0629086	0.698668	0.617622	0.790349	1.2e-08	-0.252201	0.123689	0.0414507	0.777088	1	1	1
cg00644351	0.0542679	0.733943	0.659886	0.81631	1.2e-08	-0.132644	0.113947	0.244392	0.875777	1	0	0
cg13958215	0.0555376	0.728663	0.653512	0.812457	1.2e-08	-0.0440038	0.115001	0.701987	0.95695	1	0	0
cg00865724	0.0666912	1.46778	1.28628	1.67488	1.21e-08	0.131916	0.126159	0.29573	1.14101	1	0	0
cg01090834	0.0673441	1.40369	1.24914	1.57736	1.21e-08	0.12381	0.126801	0.328859	1.1318	1	0	0
cg18133531	0.0595144	1.46235	1.28317	1.66656	1.21e-08	-0.0675203	0.13153	0.60771	0.934709	0	0	0
cg22274813	0.0664866	1.45048	1.27628	1.64846	1.22e-08	0.149094	0.13154	0.257026	1.16078	1	0	0
cg13567299	0.0652799	0.684704	0.601048	0.780003	1.22e-08	-0.0922416	0.119763	0.441182	0.911885	1	0	0
cg11664283	0.0501845	0.73679	0.663289	0.818436	1.22e-08	-0.0189071	0.122544	0.877382	0.981271	1	0	0
cg27108419	0.0536196	1.33094	1.20626	1.46851	1.22e-08	-0.136961	0.138539	0.322854	0.872004	0	0	0
cg13451093	0.0554153	0.729313	0.654251	0.812987	1.23e-08	-0.169873	0.126088	0.177898	0.843772	1	0	0
cg07570723	0.0727101	0.660945	0.573158	0.762178	1.23e-08	-0.157724	0.135007	0.242698	0.854085	1	0	0
cg26474043	0.0575657	0.720528	0.643651	0.806586	1.24e-08	-0.0737777	0.117146	0.528831	0.928878	1	0	0
cg12684668	0.0557971	0.727853	0.652453	0.811967	1.25e-08	-0.217876	0.124628	0.0804265	0.804225	1	0	0
cg20823455	0.0682788	0.677943	0.593026	0.775019	1.25e-08	-0.144682	0.118232	0.221064	0.865298	1	0	0
cg22653878	0.0602275	0.709752	0.630726	0.798679	1.25e-08	-0.0125993	0.124391	0.919321	0.98748	1	0	0
cg17981439	0.062346	0.728019	0.652628	0.812119	1.26e-08	-0.11826	0.115193	0.304595	0.888465	1	0	0
cg08412537	0.0557761	0.701274	0.62061	0.792422	1.26e-08	-0.00666605	0.125848	0.957756	0.993356	1	0	0
cg23821812	0.0629155	0.712121	0.633521	0.800473	1.27e-08	-0.17116	0.118721	0.149385	0.842686	1	0	0
cg04222728	0.0582347	0.699066	0.617966	0.79081	1.27e-08	-0.13509	0.122972	0.271969	0.873637	1	0	0
cg19909974	0.0596717	0.717953	0.640511	0.804758	1.27e-08	-0.0604209	0.134308	0.652806	0.941368	1	0	0
cg00833777	0.0601059	0.710366	0.631422	0.79918	1.27e-08	-0.00949475	0.122987	0.938463	0.99055	1	0	0
cg14702390	0.0670399	0.734342	0.660223	0.816781	1.28e-08	-0.200357	0.118996	0.0922342	0.818438	1	0	0
cg25609507	0.0572955	1.38532	1.23817	1.54995	1.28e-08	0.0702151	0.127347	0.58138	1.07274	1	0	0
cg10513118	0.054285	1.4643	1.284	1.66992	1.28e-08	-0.0726583	0.121637	0.550283	0.929918	0	0	0
cg17722002	0.0703255	1.49183	1.29975	1.71231	1.29e-08	-0.048313	0.137617	0.725538	0.952835	0	0	0
cg17775899	0.0721069	1.50681	1.30822	1.73554	1.3e-08	0.128014	0.133164	0.336386	1.13657	1	0	0
cg03131171	0.0505567	1.41537	1.25562	1.59543	1.3e-08	-0.348802	0.158981	0.028237	0.705533	0	1	0
cg08293623	0.0611008	0.750168	0.679398	0.828309	1.3e-08	0.0761279	0.127707	0.5511	1.0791	0	0	0
cg16024274	0.0629391	0.699202	0.618057	0.791	1.31e-08	-0.270827	0.124703	0.0298729	0.762749	1	1	1
cg14482968	0.0640246	0.720753	0.643806	0.806896	1.31e-08	-0.124593	0.114698	0.277363	0.882856	1	0	0
cg06899522	0.0576025	0.706053	0.626205	0.796082	1.31e-08	-0.117413	0.121509	0.333899	0.889218	1	0	0
cg09222577	0.0612316	0.694906	0.612954	0.787814	1.31e-08	0.106402	0.127295	0.403226	1.11227	0	0	0
cg08089449	0.0627801	0.699866	0.618837	0.791505	1.31e-08	0.00653407	0.123228	0.957713	1.00656	0	0	0
cg26233084	0.0579119	0.726475	0.650669	0.811111	1.32e-08	-0.194609	0.118452	0.100398	0.823156	1	0	0
cg06861115	0.0603	0.718657	0.641265	0.80539	1.32e-08	-0.143938	0.126187	0.254005	0.865941	1	0	0
cg14785527	0.0519474	0.695507	0.613645	0.788289	1.32e-08	-0.0201229	0.131731	0.87859	0.980078	1	0	0
cg10735632	0.0621339	1.3898	1.24068	1.55685	1.32e-08	-0.108105	0.135413	0.424678	0.897533	0	0	0
cg10194319	0.0638908	0.702483	0.621939	0.793459	1.32e-08	0.0758204	0.129343	0.557742	1.07877	0	0	0
cg18286501	0.0562264	1.34345	1.2134	1.48744	1.32e-08	-0.0669197	0.131211	0.610041	0.93527	0	0	0
cg15503752	0.0581349	0.709831	0.630707	0.798882	1.32e-08	0.044897	0.123205	0.715553	1.04592	0	0	0
cg06907033	0.0617941	0.724804	0.648639	0.809912	1.33e-08	-0.233159	0.115922	0.0442885	0.792027	1	1	1
cg07774251	0.0624139	0.701432	0.620667	0.792707	1.33e-08	-0.146479	0.123921	0.237191	0.863744	1	0	0
cg26403171	0.0566462	0.703894	0.623603	0.794523	1.33e-08	0.0219309	0.131519	0.867566	1.02217	0	0	0
cg25567448	0.0667039	0.725305	0.649232	0.810292	1.34e-08	-0.206561	0.115858	0.0746055	0.813377	1	0	0
cg13956645	0.0565327	1.46076	1.28174	1.66478	1.34e-08	-0.0670157	0.113316	0.554249	0.935181	0	0	0
cg19720347	0.0458917	1.29781	1.18617	1.41995	1.34e-08	-0.0368229	0.126379	0.770769	0.963847	0	0	0
cg04541474	0.0597693	1.40422	1.24899	1.57874	1.35e-08	0.141112	0.128259	0.271242	1.15155	1	0	0
cg09727277	0.044793	1.32849	1.20442	1.46534	1.36e-08	0.157056	0.123474	0.203382	1.17006	1	0	0
cg06921456	0.0644251	0.693617	0.611337	0.78697	1.36e-08	0.193326	0.126828	0.127428	1.21328	0	0	0
cg01858089	0.0500225	0.775412	0.710239	0.846565	1.36e-08	0.0218188	0.146155	0.881329	1.02206	0	0	0
cg06932415	0.0481553	0.760783	0.692262	0.836085	1.37e-08	-0.16175	0.113008	0.152341	0.850654	1	0	0
cg02863073	0.0658582	1.45332	1.27733	1.65356	1.37e-08	-0.152226	0.129666	0.240401	0.858794	0	0	0
cg08845291	0.0683575	0.757748	0.688532	0.833921	1.38e-08	-0.253666	0.119279	0.0334473	0.775951	1	1	1
cg16924010	0.0488728	0.678398	0.593333	0.775659	1.38e-08	-0.267095	0.142832	0.061484	0.7656	1	0	0
cg25296938	0.074248	0.667828	0.580916	0.767743	1.38e-08	-0.209414	0.142561	0.14185	0.81106	1	0	0
cg20891558	0.0711365	0.656108	0.567251	0.758883	1.38e-08	-0.145395	0.132048	0.270864	0.864681	1	0	0
cg02910054	0.0659657	0.687723	0.604315	0.782643	1.39e-08	-0.183765	0.128418	0.152432	0.832131	1	0	0
cg14684434	0.0624254	0.706574	0.626692	0.796638	1.39e-08	-0.138241	0.121396	0.254803	0.870888	1	0	0
cg14192542	0.0612118	0.701688	0.62088	0.793014	1.39e-08	-0.117959	0.117999	0.317476	0.888732	1	0	0
cg18640098	0.055325	0.71854	0.640997	0.805464	1.4e-08	-0.0691898	0.125327	0.580899	0.93315	1	0	0
cg09871057	0.0582649	0.73059	0.655512	0.814266	1.4e-08	0.0140123	0.127475	0.912471	1.01411	0	0	0
cg16096717	0.0679441	0.680189	0.595381	0.777076	1.41e-08	-0.259707	0.123825	0.0359614	0.771278	1	1	1
cg22388417	0.0477814	0.75742	0.688066	0.833764	1.42e-08	-0.357937	0.116798	0.00217974	0.699117	1	1	1
cg12597169	0.0626821	1.36906	1.2282	1.52608	1.42e-08	0.252795	0.11847	0.0328571	1.28762	1	1	1
cg12804755	0.0489972	0.700865	0.61984	0.792482	1.42e-08	-0.120954	0.128027	0.344787	0.886075	1	0	0
cg17937101	0.0553978	1.31123	1.194	1.43996	1.42e-08	-0.0743816	0.120885	0.53835	0.928317	0	0	0
cg20817363	0.0623946	0.702042	0.621231	0.793366	1.43e-08	-0.208451	0.126498	0.0993798	0.811841	1	0	0
cg23461800	0.0577158	1.38709	1.23873	1.55322	1.43e-08	-0.0156028	0.130085	0.904528	0.984518	0	0	0
cg15847249	0.0664615	0.686069	0.602276	0.78152	1.44e-08	-0.14922	0.13861	0.281682	0.861379	1	0	0
cg15753394	0.0610707	1.41363	1.25416	1.59338	1.44e-08	-0.130605	0.123075	0.288609	0.877565	0	0	0
cg18155840	0.0358571	1.22532	1.14217	1.31454	1.45e-08	-0.176104	0.14166	0.213815	0.838531	0	0	0
cg17913386	0.053147	1.35145	1.21776	1.49982	1.45e-08	-0.121024	0.133553	0.364834	0.886012	0	0	0
cg20572816	0.0620058	1.4035	1.24823	1.57809	1.46e-08	0.399333	0.12969	0.00207603	1.49083	1	1	1
cg14831950	0.0542048	1.35955	1.22252	1.51194	1.46e-08	0.198138	0.122934	0.107017	1.21913	1	0	0
cg06367354	0.0598208	0.724487	0.648062	0.809925	1.46e-08	-0.201441	0.125474	0.108399	0.817552	1	0	0
cg24210813	0.0568773	1.42101	1.25839	1.60463	1.46e-08	-0.123888	0.127467	0.331092	0.883479	0	0	0
cg02026235	0.0513102	1.33731	1.20937	1.4788	1.47e-08	-0.0210061	0.132747	0.874266	0.979213	0	0	0
cg09374838	0.0716176	0.666582	0.579286	0.767034	1.48e-08	-0.293952	0.132775	0.0268349	0.745313	1	1	1
cg18591801	0.0473245	0.764923	0.697164	0.839268	1.49e-08	-0.30024	0.113232	0.00801249	0.740641	1	1	1
cg25185710	0.0426032	1.27282	1.17085	1.38366	1.49e-08	-0.018281	0.121189	0.880096	0.981885	0	0	0
cg16381655	0.04141	0.791003	0.72934	0.85788	1.5e-08	0.0746154	0.111243	0.502383	1.07747	0	0	0
cg18876084	0.0537404	0.7377	0.663951	0.819642	1.51e-08	-0.295319	0.114131	0.00966625	0.744294	1	1	1
cg20455687	0.0547209	0.70214	0.621223	0.793597	1.51e-08	0.0317967	0.121172	0.793005	1.03231	0	0	0
cg01101472	0.0624721	0.73362	0.659011	0.816676	1.51e-08	0.0266944	0.133395	0.841391	1.02705	0	0	0
cg16789129	0.0454067	0.791717	0.730196	0.858422	1.52e-08	-0.337489	0.096886	0.000495154	0.71356	1	1	1
cg19632760	0.0604326	0.635638	0.543319	0.743644	1.52e-08	-0.27839	0.133021	0.0363646	0.757002	1	1	1
cg05402641	0.0493775	0.71034	0.630995	0.799662	1.52e-08	-0.0569557	0.129186	0.659299	0.944636	1	0	0
cg10033475	0.0800693	0.77338	0.707526	0.845363	1.52e-08	-0.0417338	0.112101	0.709678	0.959125	1	0	0
cg15337154	0.041272	1.32239	1.20041	1.45676	1.52e-08	-0.29083	0.150218	0.0528617	0.747643	0	0	0
cg19348484	0.0581754	0.719523	0.641986	0.806424	1.53e-08	-0.2681	0.123593	0.0300653	0.764831	1	1	1
cg09359933	0.055093	0.594804	0.496833	0.712093	1.53e-08	-0.221576	0.161525	0.170133	0.801255	1	0	0
cg09192412	0.0487728	0.722262	0.645276	0.808433	1.53e-08	-0.0936895	0.12123	0.439627	0.910565	1	0	0
cg00130707	0.0575061	0.732185	0.657243	0.815673	1.53e-08	-0.00406446	0.121248	0.973258	0.995944	1	0	0
cg07511259	0.0918266	0.758844	0.689663	0.834964	1.53e-08	0.0911469	0.128461	0.477996	1.09543	0	0	0
cg04833514	0.0489729	0.718093	0.640233	0.805421	1.55e-08	-0.161472	0.118166	0.171786	0.85089	1	0	0
cg02870147	0.0585554	0.758064	0.688684	0.834433	1.55e-08	-0.00424151	0.125783	0.9731	0.995767	1	0	0
cg03656863	0.0608991	0.727101	0.651061	0.812021	1.56e-08	-0.250492	0.118863	0.0350833	0.778418	1	1	1
cg00269800	0.056359	1.41113	1.25237	1.59003	1.56e-08	0.115284	0.121241	0.341674	1.12219	1	0	0
cg25783550	0.0612097	1.41356	1.25376	1.59374	1.56e-08	0.089246	0.133625	0.504206	1.09335	1	0	0
cg25364822	0.0580699	0.720116	0.642648	0.806922	1.56e-08	0.0162736	0.114625	0.887102	1.01641	0	0	0
cg20321801	0.0558876	0.691179	0.608114	0.78559	1.57e-08	-0.416593	0.136758	0.00231742	0.659289	1	1	1
cg20550790	0.0653257	1.46347	1.28247	1.67001	1.57e-08	0.252766	0.139222	0.0694376	1.28758	1	0	0
cg16587725	0.0673597	0.72906	0.653418	0.813457	1.57e-08	0.0364079	0.124277	0.769555	1.03708	0	0	0
cg09217215	0.0612839	1.38573	1.23752	1.55168	1.58e-08	0.17706	0.129121	0.170293	1.1937	1	0	0
cg26837708	0.057713	0.707215	0.627172	0.797474	1.58e-08	-0.0497444	0.127222	0.695795	0.951473	1	0	0
cg07918545	0.0679192	1.46793	1.28497	1.67695	1.59e-08	0.301001	0.134154	0.0248518	1.35121	1	1	1
cg14887142	0.0616756	0.705701	0.625349	0.796378	1.59e-08	-0.0395449	0.121459	0.74474	0.961227	1	0	0
cg17189639	0.0509759	1.37453	1.23094	1.53485	1.59e-08	-0.0106163	0.130393	0.93511	0.98944	0	0	0
cg14421371	0.0562904	0.749696	0.678414	0.828469	1.59e-08	0.00340148	0.128087	0.978814	1.00341	0	0	0
cg17550566	0.0590491	0.71629	0.638009	0.804177	1.6e-08	-0.12763	0.125229	0.308121	0.880179	1	0	0
cg08447373	0.0548339	0.733584	0.658833	0.816817	1.6e-08	-0.0652384	0.112747	0.56284	0.936844	1	0	0
cg15068180	0.0450973	0.749136	0.677691	0.828112	1.62e-08	-0.0594237	0.115526	0.606991	0.942307	1	0	0
cg02097144	0.051138	0.77513	0.709558	0.846762	1.62e-08	0.183337	0.129496	0.156843	1.20122	0	0	0
cg17209284	0.0455697	0.773112	0.707055	0.84534	1.63e-08	-0.267498	0.112861	0.0177806	0.765292	1	1	1
cg15888097	0.0660379	0.688727	0.605112	0.783897	1.63e-08	0.108491	0.119124	0.36243	1.1146	0	0	0
cg18027831	0.0525576	0.743203	0.670456	0.823843	1.63e-08	0.00464041	0.117684	0.968547	1.00465	0	0	0
cg22096787	0.0536501	0.75959	0.690435	0.835672	1.64e-08	-0.113201	0.118967	0.341336	0.892971	1	0	0
cg10075360	0.0487035	0.702568	0.621534	0.794167	1.64e-08	0.121347	0.144916	0.402389	1.12902	0	0	0
cg16739544	0.0625276	0.73865	0.664923	0.820551	1.64e-08	0.00909539	0.123168	0.941133	1.00914	0	0	0
cg03020181	0.0596202	0.742725	0.669851	0.823526	1.65e-08	-0.140838	0.117681	0.231394	0.86863	1	0	0
cg16348112	0.0526897	1.379	1.2334	1.54177	1.65e-08	-0.107998	0.128862	0.401981	0.897629	0	0	0
cg01556846	0.056929	0.7142	0.635435	0.802728	1.65e-08	0.0428196	0.114908	0.709413	1.04375	0	0	0
cg22276371	0.057963	1.46023	1.28034	1.66539	1.66e-08	0.427895	0.138528	0.00200914	1.53403	1	1	1
cg10070224	0.0773035	0.720953	0.64353	0.807691	1.66e-08	-0.141088	0.117152	0.228466	0.868413	1	0	0
cg02025971	0.0670765	0.646409	0.555529	0.752156	1.66e-08	-0.0642398	0.131837	0.62607	0.93778	1	0	0
cg20453412	0.0554098	0.622515	0.528025	0.733915	1.67e-08	-0.398808	0.140988	0.00467433	0.671119	1	1	1
cg15624624	0.0839939	0.697014	0.614884	0.790114	1.67e-08	-0.153662	0.122799	0.210816	0.857562	1	0	0
cg27653134	0.0639666	0.731462	0.656186	0.815373	1.67e-08	0.068667	0.121137	0.570814	1.07108	0	0	0
cg00576550	0.060228	0.680757	0.595632	0.778048	1.68e-08	-0.249252	0.1344	0.0636594	0.779383	1	0	0
cg07059469	0.0681558	0.711896	0.632631	0.801092	1.68e-08	-0.0496877	0.121985	0.683768	0.951527	1	0	0
cg18881978	0.0502665	0.753087	0.68243	0.831059	1.69e-08	-0.0713232	0.113846	0.530993	0.931161	1	0	0
cg21221377	0.0534551	0.704675	0.623981	0.795805	1.69e-08	-0.0228191	0.117412	0.845901	0.977439	1	0	0
cg01252219	0.0620505	0.739677	0.666102	0.821378	1.69e-08	0.0442211	0.12846	0.730666	1.04521	0	0	0
cg06646021	0.0666451	0.694375	0.611697	0.788228	1.71e-08	-0.254383	0.126386	0.0441406	0.775395	1	1	1
cg17966227	0.0600065	0.712906	0.633804	0.801881	1.71e-08	-0.20698	0.115697	0.0736166	0.813036	1	0	0
cg16555188	0.0529486	0.69851	0.616612	0.791285	1.71e-08	-0.133026	0.124381	0.284842	0.875442	1	0	0
cg02319094	0.0636282	0.686709	0.602621	0.78253	1.71e-08	-0.0283744	0.131064	0.828603	0.972024	1	0	0
cg11846236	0.0646821	1.34795	1.21508	1.49536	1.71e-08	-0.0874006	0.13215	0.508373	0.91631	0	0	0
cg17731409	0.0400302	0.734396	0.65964	0.817624	1.74e-08	-0.320866	0.117294	0.00622726	0.725521	1	1	1
cg25845367	0.056853	1.37773	1.23245	1.54013	1.74e-08	0.18631	0.137738	0.176171	1.2048	1	0	0
cg01095389	0.0514946	0.748088	0.676271	0.827533	1.74e-08	-0.0954517	0.118203	0.419366	0.908962	1	0	0
cg13948956	0.0547733	0.719151	0.641248	0.806518	1.74e-08	-0.0748072	0.139755	0.59246	0.927922	1	0	0
cg20686479	0.0584984	1.25311	1.15855	1.35539	1.74e-08	-0.320578	0.150082	0.0326783	0.72573	0	1	0
cg18432451	0.0627341	0.696612	0.614305	0.789948	1.75e-08	-0.199916	0.13268	0.131873	0.818799	1	0	0
cg16894211	0.064153	0.727081	0.650787	0.812319	1.75e-08	-0.103642	0.121024	0.391789	0.901548	1	0	0
cg02001060	0.0569885	0.705344	0.624701	0.796397	1.75e-08	-0.0930995	0.121946	0.445196	0.911103	1	0	0
cg27196999	0.0619461	0.725317	0.648663	0.81103	1.75e-08	-0.086062	0.124433	0.489169	0.917537	1	0	0
cg22298487	0.0565598	0.702204	0.620961	0.794077	1.75e-08	-0.0750585	0.120923	0.534788	0.927689	1	0	0
cg15880760	0.0556399	1.36825	1.22688	1.5259	1.75e-08	-0.0198392	0.142359	0.889165	0.980356	0	0	0
cg26536240	0.0602438	0.67934	0.59384	0.777149	1.76e-08	-0.288135	0.126462	0.0227003	0.74966	1	1	1
cg23869158	0.0588464	0.70048	0.618885	0.792833	1.76e-08	-0.257324	0.126187	0.0414281	0.773118	1	1	1
cg02321112	0.0476034	1.39313	1.24137	1.56345	1.76e-08	0.026886	0.125181	0.829942	1.02725	1	0	0
cg15379185	0.063188	1.40416	1.24777	1.58014	1.76e-08	-0.0696948	0.134072	0.603181	0.932678	0	0	0
cg19440858	0.0686295	0.764757	0.696632	0.839544	1.76e-08	0.0589412	0.129968	0.650185	1.06071	0	0	0
cg04597657	0.0613266	0.707881	0.62771	0.798291	1.77e-08	-0.36454	0.126863	0.00405948	0.694516	1	1	1
cg00860372	0.068149	0.71693	0.638542	0.80494	1.77e-08	-0.0952289	0.125537	0.448109	0.909165	1	0	0
cg14397231	0.0590775	0.681193	0.596021	0.778536	1.77e-08	-0.0569172	0.124632	0.6479	0.944672	1	0	0
cg12182580	0.0593188	0.726058	0.649517	0.811619	1.78e-08	-0.119689	0.116585	0.304596	0.887196	1	0	0
cg26867575	0.0568382	1.39671	1.24341	1.56891	1.78e-08	0.0807561	0.135548	0.551325	1.08411	1	0	0
cg08043998	0.062512	0.703274	0.622178	0.794941	1.79e-08	-0.220128	0.121278	0.0695132	0.802416	1	0	0
cg10987788	0.0616629	0.706646	0.626202	0.797425	1.79e-08	0.00864193	0.123411	0.944173	1.00868	0	0	0
cg03786327	0.0587016	1.39169	1.24044	1.56138	1.8e-08	0.275312	0.13646	0.0436403	1.31694	1	1	1
cg00924265	0.0575619	0.723182	0.646028	0.809552	1.8e-08	-0.20439	0.116852	0.0802669	0.815144	1	0	0
cg08160331	0.0638747	0.697952	0.615822	0.791035	1.8e-08	-0.21163	0.12424	0.0884927	0.809264	1	0	0
cg08171206	0.0728385	1.33896	1.20956	1.48221	1.81e-08	0.0917872	0.131613	0.485553	1.09613	1	0	0
cg11719784	0.0518566	1.50683	1.30636	1.73806	1.81e-08	-0.153509	0.120694	0.203413	0.857693	0	0	0
cg02920376	0.0597814	0.714296	0.63532	0.80309	1.82e-08	-0.278714	0.121463	0.0217541	0.756756	1	1	1
cg08308032	0.0502435	0.689018	0.605183	0.784467	1.83e-08	-0.315363	0.117156	0.00710637	0.729524	1	1	1
cg09423126	0.0661935	1.32675	1.20233	1.46406	1.83e-08	0.145691	0.119176	0.221526	1.15684	1	0	0
cg23273843	0.0709541	0.670821	0.583728	0.770909	1.83e-08	-0.0469722	0.125621	0.708464	0.954114	1	0	0
cg24109790	0.0538464	0.738727	0.664737	0.820953	1.87e-08	-0.234162	0.115089	0.0418888	0.791234	1	1	1
cg10515232	0.0577376	0.758042	0.688276	0.83488	1.87e-08	-0.224006	0.121407	0.0650254	0.79931	1	0	0
cg19302979	0.0492606	0.72274	0.64541	0.809335	1.87e-08	0.118844	0.122426	0.331678	1.12619	0	0	0
cg14217074	0.0565513	0.727599	0.651262	0.812884	1.87e-08	0.0990661	0.12768	0.437811	1.10414	0	0	0
cg19602694	0.0522635	0.745363	0.672793	0.825762	1.88e-08	-0.321775	0.121425	0.00804971	0.724862	1	1	1
cg00486525	0.058008	0.71845	0.640231	0.806226	1.88e-08	-0.144283	0.116466	0.215402	0.865643	1	0	0
cg15651980	0.0499975	0.754925	0.684457	0.832649	1.88e-08	-0.128218	0.127671	0.315239	0.879661	1	0	0
cg11708690	0.0353056	0.721676	0.644118	0.808572	1.88e-08	-0.0896749	0.120858	0.458097	0.914228	1	0	0
cg13034073	0.0581848	0.720981	0.643275	0.808073	1.88e-08	-0.0424942	0.12185	0.727282	0.958396	1	0	0
cg22655224	0.0588113	1.21959	1.13805	1.30697	1.88e-08	-0.35482	0.183419	0.053054	0.701299	0	0	0
cg06924976	0.0555825	1.36682	1.22575	1.52414	1.89e-08	-0.311176	0.135077	0.0212396	0.732585	0	1	0
cg08961547	0.0612807	1.41117	1.25146	1.59126	1.91e-08	0.0775345	0.122556	0.526964	1.08062	1	0	0
cg08161138	0.0547372	0.735203	0.660412	0.818464	1.91e-08	0.0489261	0.137142	0.721274	1.05014	0	0	0
cg21913981	0.0689299	1.47298	1.28684	1.68605	1.93e-08	0.260334	0.141061	0.0649591	1.29736	1	0	0
cg18046464	0.0526155	1.3439	1.21222	1.48988	1.94e-08	-0.0584677	0.131219	0.655905	0.943209	0	0	0
cg19916794	0.0696258	0.701605	0.619989	0.793964	1.95e-08	-0.144126	0.131225	0.272068	0.865778	1	0	0
cg02631468	0.0637316	1.43039	1.26243	1.62071	1.95e-08	-0.0418728	0.130742	0.748764	0.958992	0	0	0
cg21248274	0.0630971	0.676332	0.590058	0.775221	1.95e-08	0.0207787	0.127308	0.870349	1.021	0	0	0
cg06854478	0.0627672	0.697951	0.615621	0.791292	1.96e-08	-0.41054	0.128003	0.00134001	0.663292	1	1	1
cg25806704	0.0613102	0.702937	0.621568	0.794958	1.96e-08	-0.215633	0.116282	0.0636829	0.806031	1	0	0
cg13689699	0.0558255	0.730886	0.655136	0.815396	1.96e-08	-0.117516	0.12033	0.328762	0.889127	1	0	0
cg13874070	0.0347343	1.21538	1.13539	1.301	1.96e-08	-0.313868	0.168712	0.0628318	0.730616	0	0	0
cg24873022	0.0640407	0.708713	0.628468	0.799204	1.96e-08	0.0895009	0.121516	0.461405	1.09363	0	0	0
cg07507493	0.0580461	0.721863	0.644237	0.808842	1.97e-08	-0.0428549	0.116446	0.712855	0.95805	1	0	0
cg16900264	0.0592531	0.717028	0.63841	0.805327	1.98e-08	-0.207142	0.123288	0.0929296	0.812905	1	0	0
cg02970919	0.0486657	0.729841	0.653836	0.814682	1.99e-08	-0.0300314	0.120347	0.802943	0.970415	1	0	0
cg20402658	0.072507	0.760964	0.691735	0.837121	1.99e-08	-0.0213049	0.12659	0.866349	0.97892	1	0	0
cg02097203	0.0561085	0.665663	0.57748	0.767313	1.99e-08	0.00438122	0.126826	0.972442	1.00439	0	0	0
cg06858263	0.0355052	0.691353	0.607733	0.786479	2e-08	-0.125072	0.131145	0.340239	0.882433	1	0	0
cg14570051	0.0535704	0.740339	0.666548	0.822299	2e-08	-0.0122968	0.121708	0.919523	0.987779	1	0	0
cg02000965	0.0657743	0.819333	0.764255	0.87838	2e-08	0.0602565	0.116348	0.604527	1.06211	0	0	0
cg19004883	0.0576737	0.729411	0.653289	0.814402	2.01e-08	-0.0471229	0.129745	0.716458	0.95397	1	0	0
cg02985539	0.056234	0.723519	0.646187	0.810106	2.01e-08	0.0795614	0.124855	0.523976	1.08281	0	0	0
cg19924352	0.0582032	0.73232	0.6568	0.816522	2.02e-08	-0.327301	0.128061	0.0105941	0.720867	1	1	1
cg14788334	0.0555299	0.67882	0.592895	0.777199	2.02e-08	-0.147113	0.137688	0.285318	0.863197	1	0	0
cg06512263	0.0690521	0.721408	0.643633	0.808581	2.02e-08	0.0249668	0.126039	0.842976	1.02528	0	0	0
cg12485386	0.0600387	0.714062	0.634791	0.803232	2.03e-08	-0.197717	0.145636	0.174588	0.820602	1	0	0
cg08134671	0.0606152	0.711776	0.632044	0.801565	2.03e-08	0.102576	0.121432	0.398269	1.10802	0	0	0
cg13466576	0.0514848	0.752829	0.681717	0.831359	2.04e-08	-0.0544094	0.118504	0.646136	0.947044	1	0	0
cg19660744	0.0551309	0.749179	0.67727	0.828723	2.04e-08	-0.0373115	0.110908	0.736556	0.963376	1	0	0
cg21058488	0.050625	0.734015	0.658836	0.817772	2.04e-08	-0.0161234	0.118598	0.891861	0.984006	1	0	0
cg04504043	0.0607809	0.711175	0.631305	0.801149	2.05e-08	0.113345	0.124336	0.361977	1.12002	0	0	0
cg00710229	0.0590236	0.718239	0.639776	0.806325	2.06e-08	-0.160547	0.122889	0.191405	0.851678	1	0	0
cg20063106	0.0558888	0.730992	0.655149	0.815615	2.06e-08	0.051145	0.121213	0.673065	1.05248	0	0	0
cg25572459	0.0540547	0.738574	0.664328	0.821118	2.07e-08	-0.13513	0.111322	0.224799	0.873602	1	0	0
cg26149887	0.0556588	0.732006	0.656353	0.816378	2.08e-08	-0.272434	0.116148	0.0189982	0.761524	1	1	1
cg12440105	0.0597363	1.39768	1.24325	1.57128	2.08e-08	0.138142	0.132846	0.298404	1.14814	1	0	0
cg01051098	0.0610767	0.71013	0.630013	0.800436	2.09e-08	-0.259958	0.124178	0.0363114	0.771084	1	1	1
cg17759475	0.0477349	0.692731	0.60926	0.787636	2.09e-08	-0.0742181	0.124092	0.549781	0.928469	1	0	0
cg20462493	0.0655091	0.765273	0.696922	0.840327	2.09e-08	0.00941011	0.124451	0.939727	1.00945	0	0	0
cg14767442	0.0552882	0.605918	0.508515	0.721978	2.1e-08	-0.53065	0.207445	0.0105266	0.588222	1	1	1
cg11083848	0.0894147	0.733597	0.658258	0.817559	2.1e-08	-0.179621	0.114599	0.117022	0.835586	1	0	0
cg03957108	0.0744595	0.658889	0.569419	0.762416	2.11e-08	-0.149473	0.138386	0.280093	0.861162	1	0	0
cg00323842	0.0640912	0.735721	0.660824	0.819106	2.11e-08	-0.0738996	0.124038	0.55132	0.928765	1	0	0
cg22241045	0.0547783	0.698317	0.615883	0.791785	2.11e-08	-0.0358917	0.124402	0.772953	0.964745	1	0	0
cg20165746	0.0551397	0.706055	0.625093	0.797503	2.13e-08	-0.191749	0.119097	0.107391	0.825514	1	0	0
cg04393701	0.0621402	0.794459	0.733001	0.86107	2.13e-08	-0.154591	0.116067	0.182892	0.856766	1	0	0
cg16965794	0.0410793	0.734285	0.659067	0.818087	2.13e-08	0.00336602	0.126871	0.978834	1.00337	0	0	0
cg07434271	0.0463291	1.44985	1.27311	1.65114	2.14e-08	0.151251	0.135902	0.265732	1.16329	1	0	0
cg11721803	0.0663277	1.34612	1.21312	1.4937	2.14e-08	-0.0929078	0.132195	0.482174	0.911278	0	0	0
cg03805618	0.0678318	1.29625	1.18373	1.41946	2.14e-08	-0.0438351	0.124488	0.724746	0.957112	0	0	0
cg16732616	0.0530764	1.46209	1.28007	1.66998	2.14e-08	-0.00428446	0.130919	0.973893	0.995725	0	0	0
cg24405999	0.0648287	1.43768	1.26614	1.63247	2.15e-08	0.0625993	0.128863	0.627121	1.0646	1	0	0
cg21762523	0.0613038	1.40956	1.24997	1.58951	2.15e-08	-0.0276163	0.126418	0.827078	0.972762	0	0	0
cg10888348	0.0593296	0.717351	0.638602	0.805811	2.16e-08	-0.352727	0.120301	0.00336748	0.702769	1	1	1
cg01534527	0.0570039	0.726755	0.649929	0.812662	2.16e-08	-0.147195	0.121931	0.227357	0.863126	1	0	0
cg15993652	0.060193	0.713908	0.634463	0.803302	2.16e-08	-0.123648	0.116819	0.289844	0.883691	1	0	0
cg12808664	0.0604176	0.713022	0.633396	0.802658	2.16e-08	-0.0959823	0.122572	0.433587	0.90848	1	0	0
cg16206191	0.0522031	0.746583	0.673974	0.827015	2.16e-08	0.0401227	0.121103	0.740411	1.04094	0	0	0
cg21221571	0.0438582	0.707521	0.626801	0.798637	2.17e-08	-0.0882435	0.127509	0.4889	0.915538	1	0	0
cg13299728	0.0618064	0.723916	0.646487	0.81062	2.17e-08	0.131551	0.133092	0.322944	1.1406	0	0	0
cg04729730	0.057717	1.2783	1.17301	1.39304	2.17e-08	-0.0136951	0.127424	0.914411	0.986398	0	0	0
cg03964958	0.0693747	1.47449	1.28704	1.68925	2.18e-08	0.135487	0.133528	0.310262	1.14509	1	0	0
cg08994923	0.0558482	0.731568	0.655717	0.816193	2.18e-08	0.0740349	0.1208	0.53996	1.07684	0	0	0
cg06086887	0.0651327	0.67941	0.593387	0.777904	2.19e-08	-0.118963	0.132079	0.367753	0.887841	1	0	0
cg17852507	0.0529267	0.743634	0.67036	0.824918	2.19e-08	-0.060244	0.113976	0.597106	0.941535	1	0	0
cg03607573	0.0442184	0.694528	0.611292	0.789098	2.19e-08	0.215544	0.119691	0.0717289	1.24054	0	0	0
cg16884847	0.0690717	0.768364	0.700627	0.842649	2.19e-08	0.168341	0.130812	0.198132	1.18334	0	0	0
cg07584582	0.0470862	0.780775	0.715957	0.85146	2.19e-08	0.0463902	0.132669	0.726587	1.04748	0	0	0
cg01994902	0.0647364	0.696122	0.613171	0.790295	2.2e-08	0.0718123	0.128697	0.576847	1.07445	0	0	0
cg19113668	0.0599839	1.33373	1.20575	1.47529	2.2e-08	-0.0567141	0.13198	0.6674	0.944864	0	0	0
cg16413763	0.0514685	0.714883	0.635589	0.804069	2.2e-08	0.00486211	0.130678	0.97032	1.00487	0	0	0
cg03376308	0.0574871	0.724957	0.647708	0.811419	2.21e-08	-0.296901	0.119251	0.0127845	0.743117	1	1	1
cg17512364	0.0452683	1.28823	1.17885	1.40775	2.21e-08	0.00428415	0.128569	0.973418	1.00429	1	0	0
cg00459623	0.0677247	1.46068	1.27911	1.66803	2.21e-08	-0.0392964	0.13663	0.773644	0.961466	0	0	0
cg06418282	0.0586131	0.720449	0.642261	0.808156	2.22e-08	-0.2297	0.119964	0.0555243	0.794772	1	0	0
cg14209346	0.0590817	0.718571	0.639999	0.806789	2.22e-08	0.084178	0.130197	0.517928	1.08782	0	0	0
cg03142071	0.0684366	0.747524	0.675059	0.827767	2.23e-08	-0.236534	0.118106	0.0452065	0.789359	1	1	1
cg20980271	0.056896	0.727423	0.650665	0.813237	2.23e-08	-0.204956	0.118781	0.0844371	0.814683	1	0	0
cg01829672	0.0520241	0.681949	0.596346	0.779839	2.23e-08	-0.0182222	0.133926	0.891772	0.981943	1	0	0
cg13043150	0.0522576	1.17636	1.11127	1.24526	2.23e-08	-0.18025	0.195711	0.357052	0.835062	0	0	0
cg27655855	0.0290414	0.746566	0.673886	0.827085	2.23e-08	0.0732541	0.123259	0.552306	1.076	0	0	0
cg07638450	0.0613589	0.709528	0.629131	0.8002	2.24e-08	-0.273959	0.115667	0.0178603	0.760364	1	1	1
cg09918599	0.0599499	0.715148	0.635867	0.804313	2.24e-08	-0.156865	0.115849	0.175724	0.85482	1	0	0
cg06727242	0.0606044	0.71255	0.632745	0.802421	2.24e-08	-0.0229808	0.126248	0.85556	0.977281	1	0	0
cg07151160	0.0591253	0.718481	0.639864	0.806757	2.25e-08	-0.180979	0.117101	0.122227	0.834453	1	0	0
cg25339112	0.0516919	0.728977	0.652519	0.814395	2.25e-08	-0.0398773	0.135771	0.768979	0.960907	1	0	0
cg23791611	0.0565331	1.21702	1.13605	1.30376	2.25e-08	-0.215239	0.147684	0.144997	0.806349	0	0	0
cg01821043	0.0566299	0.748976	0.676812	0.828836	2.25e-08	0.125457	0.13412	0.349579	1.13367	0	0	0
cg15930085	0.0351274	0.728596	0.652054	0.814124	2.25e-08	0.06113	0.121587	0.615129	1.06304	0	0	0
cg08583240	0.0524468	0.745861	0.673	0.82661	2.26e-08	-0.0399619	0.120262	0.739669	0.960826	1	0	0
cg20091689	0.0565915	0.715681	0.636471	0.804748	2.27e-08	-0.301458	0.121092	0.0127922	0.739739	1	1	1
cg27150412	0.0627514	0.728804	0.652289	0.814294	2.27e-08	-0.229587	0.144334	0.111687	0.794862	1	0	0
cg21579710	0.0598456	0.704138	0.62265	0.796291	2.27e-08	-0.0756968	0.119165	0.52528	0.927097	1	0	0
cg14651249	0.059614	1.39545	1.24157	1.5684	2.28e-08	0.0736617	0.121927	0.545748	1.07644	1	0	0
cg12449837	0.0399052	0.735831	0.660786	0.819399	2.28e-08	-0.00105119	0.116307	0.992789	0.998949	1	0	0
cg08119275	0.0548839	1.24987	1.15584	1.35155	2.28e-08	-0.138805	0.143047	0.331874	0.870398	0	0	0
cg08079376	0.058468	0.721248	0.643157	0.808822	2.29e-08	-0.175825	0.111373	0.114406	0.838765	1	0	0
cg03963963	0.0516632	0.749212	0.677063	0.82905	2.29e-08	0.0332282	0.112301	0.767318	1.03379	0	0	0
cg12536880	0.0713542	0.745432	0.67244	0.826346	2.3e-08	-0.16621	0.120339	0.167224	0.846869	1	0	0
cg10364040	0.0719486	1.48992	1.29547	1.71356	2.3e-08	0.187016	0.139401	0.179734	1.20565	1	0	0
cg01431992	0.0525776	0.668953	0.580969	0.770262	2.3e-08	-0.00403723	0.123036	0.973823	0.995971	1	0	0
cg10373196	0.0575167	1.28572	1.17722	1.40423	2.31e-08	-0.10667	0.147414	0.469306	0.898822	0	0	0
cg03331715	0.056616	0.728828	0.652279	0.81436	2.31e-08	0.063637	0.124973	0.610607	1.06571	0	0	0
cg20514973	0.0449842	0.725167	0.647858	0.811702	2.31e-08	0.0510903	0.130078	0.694491	1.05242	0	0	0
cg18676237	0.0530592	1.34504	1.21219	1.49245	2.31e-08	-0.0312973	0.131485	0.811858	0.969187	0	0	0
cg19356515	0.0674415	0.686073	0.601124	0.783027	2.32e-08	-0.17037	0.125526	0.174701	0.843353	1	0	0
cg11672757	0.0520478	0.747697	0.675185	0.827997	2.32e-08	-0.00333851	0.121651	0.978106	0.996667	1	0	0
cg18709893	0.0494201	0.758803	0.688751	0.835979	2.34e-08	-0.0968453	0.117174	0.408517	0.907696	1	0	0
cg16596052	0.0573566	0.725933	0.648745	0.812304	2.35e-08	-0.232757	0.121374	0.0551516	0.792346	1	0	0
cg05057352	0.0580898	0.722978	0.645177	0.810161	2.35e-08	-0.145805	0.119868	0.223844	0.864327	1	0	0
cg20382493	0.0577577	0.709249	0.628668	0.800158	2.36e-08	-0.30694	0.119102	0.00996278	0.735695	1	1	1
cg20299802	0.0615333	0.724345	0.646818	0.811164	2.36e-08	-0.231262	0.122799	0.0596652	0.793531	1	0	0
cg11635155	0.0491813	0.759914	0.690083	0.836811	2.37e-08	-0.0202088	0.119874	0.866123	0.979994	1	0	0
cg17987176	0.0583352	1.3849	1.23528	1.55265	2.38e-08	0.0605633	0.127196	0.633973	1.06243	1	0	0
cg15123104	0.0603978	0.713839	0.634147	0.803547	2.39e-08	-0.113905	0.122267	0.351537	0.892342	1	0	0
cg19918022	0.0422792	0.789807	0.726998	0.858044	2.39e-08	-0.0114364	0.111322	0.918175	0.988629	1	0	0
cg26917754	0.0557752	0.73253	0.656673	0.817149	2.4e-08	-0.145629	0.114649	0.20401	0.864479	1	0	0
cg15910070	0.0636255	0.750228	0.678196	0.82991	2.4e-08	-0.150843	0.125772	0.230395	0.859982	1	0	0
cg03770907	0.0515011	0.701149	0.618945	0.79427	2.4e-08	-0.0170855	0.129903	0.89536	0.98306	1	0	0
cg24578679	0.0552767	1.36166	1.22167	1.5177	2.44e-08	0.0430516	0.125356	0.731272	1.04399	1	0	0
cg13329723	0.0553521	0.734682	0.659247	0.81875	2.44e-08	0.026514	0.118177	0.822478	1.02687	0	0	0
cg05828191	0.0600325	0.715478	0.636058	0.804815	2.45e-08	-0.275028	0.124549	0.0272304	0.759551	1	1	1
cg17595386	0.0521331	0.747729	0.675101	0.828171	2.46e-08	-0.191417	0.104578	0.0671943	0.825788	1	0	0
cg12036817	0.0593953	0.68679	0.601821	0.783755	2.46e-08	-0.163488	0.129399	0.206432	0.849177	1	0	0
cg06922496	0.0533602	0.742639	0.668894	0.824514	2.46e-08	-0.0528358	0.115113	0.646242	0.948536	1	0	0
cg04738827	0.0673832	0.718057	0.639148	0.806708	2.46e-08	-0.0355213	0.12728	0.780183	0.965102	1	0	0
cg00866690	0.0486619	0.701369	0.619143	0.794516	2.47e-08	-0.0767329	0.122255	0.530234	0.926137	1	0	0
cg22163406	0.0636226	0.762378	0.693026	0.83867	2.47e-08	0.0188206	0.121671	0.877071	1.019	0	0	0
cg14453935	0.0919498	1.42448	1.25785	1.61318	2.48e-08	0.167788	0.12847	0.191535	1.18269	1	0	0
cg14373727	0.0459073	0.598934	0.500162	0.71721	2.48e-08	-0.136168	0.136066	0.316946	0.872696	1	0	0
cg03091027	0.063471	0.774207	0.707588	0.847097	2.48e-08	-0.0878083	0.119938	0.464099	0.915936	1	0	0
cg02468966	0.0674691	0.686543	0.601503	0.783606	2.49e-08	0.00282484	0.126499	0.982184	1.00283	0	0	0
cg18083114	0.0551146	1.35959	1.22037	1.51468	2.5e-08	0.249958	0.135886	0.065846	1.28397	1	0	0
cg02084214	0.0620015	0.707823	0.626829	0.799283	2.5e-08	-0.14197	0.123613	0.250759	0.867647	1	0	0
cg01371233	0.0580024	0.723788	0.64601	0.810929	2.5e-08	-0.0950768	0.120526	0.430201	0.909303	1	0	0
cg01127059	0.0622134	0.70701	0.625849	0.798697	2.51e-08	-0.16534	0.129496	0.201674	0.847605	1	0	0
cg21741010	0.0539677	0.719448	0.640767	0.807789	2.51e-08	-0.129985	0.118805	0.273909	0.878108	1	0	0
cg00264754	0.0590914	0.740277	0.665973	0.82287	2.51e-08	-0.00248047	0.128803	0.984635	0.997523	1	0	0
cg26982321	0.0593874	0.718266	0.639344	0.806931	2.52e-08	-0.274829	0.125531	0.0285733	0.759702	1	1	1
cg09975620	0.0575039	1.38665	1.23603	1.55563	2.52e-08	0.139608	0.129291	0.280232	1.14982	1	0	0
cg16541026	0.0586691	1.3777	1.23086	1.54207	2.52e-08	0.0232597	0.117824	0.843507	1.02353	1	0	0
cg25356164	0.0687996	1.46708	1.28201	1.67886	2.53e-08	0.0797434	0.130561	0.54135	1.08301	1	0	0
cg14370507	0.0570545	0.727719	0.650727	0.813821	2.54e-08	-0.0972114	0.121675	0.424324	0.907364	1	0	0
cg22388347	0.057858	0.724504	0.646833	0.811502	2.55e-08	-0.117486	0.121069	0.331843	0.889153	1	0	0
cg07160746	0.0748801	1.51744	1.3103	1.75731	2.56e-08	0.132696	0.131635	0.313426	1.1419	1	0	0
cg12400725	0.0660647	0.692173	0.608107	0.787859	2.56e-08	-0.0527079	0.123047	0.668393	0.948657	1	0	0
cg08103072	0.0572455	0.727018	0.649857	0.813341	2.56e-08	-0.00834142	0.126241	0.947318	0.991693	1	0	0
cg10168726	0.0569934	0.741058	0.666871	0.823499	2.57e-08	-0.0178239	0.117393	0.87932	0.982334	1	0	0
cg12160258	0.0538189	1.3735	1.22833	1.53582	2.57e-08	-0.102326	0.126031	0.416843	0.902735	0	0	0
cg03328201	0.0515307	0.750571	0.678467	0.830338	2.58e-08	-0.229506	0.109799	0.0365966	0.794926	1	1	1
cg11568290	0.0534103	0.723444	0.645513	0.810784	2.59e-08	-0.157872	0.119366	0.185973	0.853959	1	0	0
cg10508317	0.058153	1.34626	1.21246	1.49483	2.59e-08	0.0477196	0.121612	0.694769	1.04888	1	0	0
cg17879101	0.043943	0.724448	0.646717	0.811521	2.6e-08	-0.450659	0.118541	0.000143699	0.637208	1	1	1
cg05306107	0.0610129	0.761213	0.691486	0.83797	2.6e-08	-0.21517	0.115813	0.0631836	0.806405	1	0	0
cg18878150	0.0549585	0.744607	0.67117	0.82608	2.6e-08	-0.216728	0.119595	0.069958	0.805149	1	0	0
cg01100322	0.0529778	0.712031	0.631779	0.802479	2.6e-08	-0.116302	0.120984	0.336401	0.890206	1	0	0
cg21773820	0.049016	0.736438	0.661235	0.820195	2.6e-08	-0.10775	0.12512	0.389144	0.897852	1	0	0
cg25129097	0.0577523	0.732022	0.655874	0.81701	2.6e-08	0.124285	0.126087	0.324277	1.13234	0	0	0
cg21915828	0.0579098	0.783008	0.718392	0.853435	2.6e-08	0.0468608	0.127709	0.713668	1.04798	0	0	0
cg05732979	0.0560425	1.37915	1.23156	1.54444	2.6e-08	-0.0252961	0.129347	0.844949	0.975021	0	0	0
cg11265839	0.0733628	0.714983	0.635311	0.804646	2.61e-08	-0.313159	0.116502	0.00718756	0.731133	1	1	1
cg00130693	0.0586046	0.721674	0.643364	0.809516	2.61e-08	-0.173887	0.119504	0.145651	0.840392	1	0	0
cg15754660	0.0602786	0.664756	0.575726	0.767554	2.61e-08	-0.0161982	0.126009	0.897715	0.983932	1	0	0
cg04834825	0.0488142	0.762099	0.692565	0.838614	2.61e-08	0.123911	0.131563	0.346275	1.13192	0	0	0
cg10071643	0.0554805	1.36171	1.22141	1.51814	2.62e-08	-0.0253548	0.137114	0.853293	0.974964	0	0	0
cg11272705	0.0327189	1.19969	1.12517	1.27914	2.63e-08	-0.135812	0.138961	0.328402	0.873007	0	0	0
cg13599734	0.0741351	0.662009	0.57248	0.76554	2.64e-08	-0.0578809	0.133011	0.663447	0.943762	1	0	0
cg02874667	0.0538552	0.741102	0.666862	0.823606	2.65e-08	-0.152401	0.117479	0.194543	0.858644	1	0	0
cg09381022	0.0578734	0.724731	0.647016	0.811781	2.65e-08	-0.0308734	0.120574	0.79791	0.969598	1	0	0
cg05920420	0.044198	0.782034	0.717141	0.8528	2.66e-08	-0.182694	0.110075	0.0969704	0.833023	1	0	0
cg15740790	0.0710457	1.48466	1.29167	1.70648	2.66e-08	0.151775	0.138277	0.272373	1.1639	1	0	0
cg05136956	0.0593831	0.724934	0.647243	0.81195	2.67e-08	-0.0878536	0.112193	0.433592	0.915895	1	0	0
cg27406975	0.0578372	1.39138	1.2385	1.56312	2.67e-08	-0.0872309	0.133209	0.512568	0.916465	0	0	0
cg26859042	0.0555462	0.734263	0.658523	0.818715	2.68e-08	-0.125208	0.110579	0.257513	0.882314	1	0	0
cg06459104	0.0427177	0.709908	0.629147	0.801035	2.69e-08	-0.164862	0.130742	0.207319	0.848011	1	0	0
cg07849823	0.0616182	1.26811	1.16626	1.37885	2.69e-08	-0.101364	0.152337	0.505799	0.903604	0	0	0
cg04839207	0.0604041	0.714737	0.634937	0.804567	2.7e-08	-0.0562064	0.124663	0.652086	0.945344	1	0	0
cg08536838	0.0615174	0.710346	0.62966	0.801371	2.71e-08	-0.223382	0.121653	0.0663241	0.799809	1	0	0
cg21971807	0.062301	0.722199	0.643907	0.810009	2.71e-08	-0.1841	0.117571	0.117382	0.831853	1	0	0
cg09690103	0.0585447	0.707274	0.625975	0.799132	2.71e-08	0.0619599	0.124769	0.619473	1.06392	0	0	0
cg09850150	0.0508884	0.753616	0.682077	0.832657	2.72e-08	-0.168919	0.102136	0.0981541	0.844577	1	0	0
cg06946797	0.0530179	0.665505	0.576484	0.768272	2.73e-08	-0.0935469	0.141949	0.509884	0.910695	1	0	0
cg23568192	0.0732656	0.74477	0.671264	0.826325	2.73e-08	0.0464825	0.127437	0.715299	1.04758	0	0	0
cg27181468	0.0488784	0.762138	0.692513	0.838762	2.74e-08	-0.213345	0.119074	0.0731801	0.807877	1	0	0
cg05395403	0.0560515	1.34873	1.21366	1.49884	2.75e-08	0.207463	0.124788	0.096406	1.23055	1	0	0
cg14186304	0.0647677	0.731159	0.654704	0.816544	2.75e-08	-0.183889	0.113888	0.106387	0.832028	1	0	0
cg00039176	0.0563524	1.43318	1.26232	1.62716	2.75e-08	0.199549	0.132409	0.131794	1.22085	1	0	0
cg08409173	0.0538414	1.36543	1.22338	1.52399	2.75e-08	-0.00481803	0.130021	0.970441	0.995194	0	0	0
cg13255398	0.0726379	0.667933	0.5793	0.770128	2.76e-08	-0.0703515	0.132169	0.594528	0.932066	1	0	0
cg14080888	0.06286	0.705271	0.623518	0.797742	2.78e-08	-0.00858409	0.121573	0.943709	0.991453	1	0	0
cg16393877	0.0537671	0.741821	0.667625	0.824263	2.78e-08	0.132762	0.120283	0.269704	1.14198	0	0	0
cg10589443	0.072377	0.668978	0.580503	0.770938	2.79e-08	-0.212578	0.134749	0.114659	0.808497	1	0	0
cg05910407	0.0662818	0.692014	0.607709	0.788015	2.79e-08	-0.175176	0.124381	0.15902	0.839309	1	0	0
cg17452384	0.0604964	0.772859	0.705681	0.846432	2.8e-08	-0.14394	0.11481	0.209944	0.86594	1	0	0
cg04613258	0.0463954	0.714635	0.634731	0.804598	2.8e-08	-0.129493	0.128894	0.315067	0.878541	1	0	0
cg01292613	0.0547096	0.738035	0.662991	0.821572	2.82e-08	-0.13301	0.118262	0.260714	0.875457	1	0	0
cg26500312	0.0530265	0.744974	0.671437	0.826566	2.82e-08	-0.107991	0.117977	0.360008	0.897636	1	0	0
cg06857289	0.0574683	1.37584	1.22928	1.53987	2.82e-08	-0.180229	0.135568	0.183704	0.835079	0	0	0
cg22331200	0.0576707	0.726034	0.648436	0.812917	2.83e-08	-0.0677127	0.121561	0.577508	0.934529	1	0	0
cg15750963	0.0515422	0.751189	0.67901	0.83104	2.84e-08	-0.0808312	0.11761	0.491906	0.922349	1	0	0
cg06672226	0.0389206	0.7064	0.62479	0.79867	2.87e-08	-0.0716968	0.118445	0.544968	0.930813	1	0	0
cg07070039	0.0626368	1.24107	1.14992	1.33945	2.87e-08	-0.144362	0.157172	0.358358	0.865574	0	0	0
cg08737815	0.0539554	0.741313	0.666921	0.824002	2.89e-08	-0.279896	0.117509	0.0172233	0.755863	1	1	1
cg16347155	0.05856	0.722695	0.644331	0.810591	2.92e-08	-0.284395	0.117706	0.0156857	0.752469	1	1	1
cg17771050	0.0830744	1.30145	1.18573	1.42847	2.93e-08	-0.1353	0.128333	0.291748	0.873453	0	0	0
cg16204420	0.0475128	0.630848	0.536058	0.7424	2.93e-08	0.0374667	0.135356	0.781932	1.03818	0	0	0
cg11586382	0.050882	0.741733	0.6674	0.824345	2.94e-08	-0.245548	0.118687	0.0385584	0.782276	1	1	1
cg14919455	0.0538784	0.75416	0.682579	0.833248	2.94e-08	-0.254828	0.124347	0.0404309	0.77505	1	1	1
cg13316587	0.052825	1.34033	1.2085	1.48654	2.94e-08	0.202426	0.112406	0.0717261	1.22437	1	0	0
cg00902104	0.0589008	1.38624	1.2351	1.55588	2.94e-08	0.204302	0.130328	0.116976	1.22667	1	0	0
cg14529758	0.0562219	0.732171	0.655777	0.817464	2.94e-08	-0.0449005	0.120962	0.710491	0.956093	1	0	0
cg06487082	0.0834209	0.629699	0.534719	0.741551	2.95e-08	-0.213543	0.146649	0.145351	0.807718	1	0	0
cg06332269	0.0566983	0.730272	0.653466	0.816105	2.96e-08	-0.0406695	0.124759	0.744435	0.960146	1	0	0
cg21383534	0.0471448	0.770025	0.702061	0.844567	2.97e-08	-0.00871479	0.13325	0.947854	0.991323	1	0	0
cg00456651	0.0594014	1.38996	1.2372	1.56158	2.97e-08	-0.00600264	0.13128	0.96353	0.994015	0	0	0
cg18564167	0.0536925	0.742667	0.668484	0.825082	3.01e-08	0.075628	0.120347	0.52973	1.07856	0	0	0
cg24650915	0.0527264	0.71576	0.635898	0.805651	3.02e-08	-0.216942	0.121671	0.0745828	0.804977	1	0	0
cg11601027	0.0603614	1.33926	1.20777	1.48506	3.02e-08	0.1944	0.119212	0.102953	1.21458	1	0	0
cg20455395	0.0601702	0.716545	0.636835	0.806233	3.03e-08	-0.108486	0.130476	0.405712	0.897191	1	0	0
cg00033165	0.0629662	0.783204	0.71833	0.853937	3.04e-08	-0.294683	0.11319	0.00922979	0.744768	1	1	1
cg10057904	0.0441151	0.705541	0.623627	0.798213	3.04e-08	-0.152377	0.123488	0.217222	0.858664	1	0	0
cg00741609	0.0476571	1.49849	1.29865	1.72908	3.05e-08	0.1791	0.130006	0.168319	1.19614	1	0	0
cg27413603	0.054098	0.741093	0.666537	0.823988	3.05e-08	-0.0747453	0.119413	0.531354	0.92798	1	0	0
cg16334127	0.0730278	0.768005	0.699517	0.843198	3.05e-08	-0.0528153	0.123221	0.668198	0.948555	1	0	0
cg26881527	0.0450885	1.28361	1.17504	1.40221	3.07e-08	0.0985688	0.115572	0.393729	1.10359	1	0	0
cg02134353	0.0615568	1.38719	1.23544	1.55759	3.08e-08	0.151758	0.13449	0.259153	1.16388	1	0	0
cg06152926	0.0591117	0.711181	0.630352	0.802375	3.08e-08	-0.102201	0.122798	0.405256	0.902848	1	0	0
cg15753239	0.0587853	0.72222	0.643623	0.810415	3.1e-08	-0.113376	0.126491	0.370082	0.892815	1	0	0
cg19046826	0.0548534	1.35475	1.21665	1.50852	3.11e-08	-0.0360515	0.14014	0.796983	0.964591	0	0	0
cg01175020	0.05353	1.47094	1.28305	1.68634	3.12e-08	0.264573	0.135968	0.0516734	1.30287	1	0	0
cg12305074	0.0697262	0.734036	0.657905	0.818977	3.12e-08	0.216657	0.128636	0.0921292	1.24192	0	0	0
cg12837744	0.0558671	1.34483	1.21088	1.49359	3.12e-08	-0.0856317	0.127416	0.501543	0.917932	0	0	0
cg11015424	0.071748	0.672299	0.584104	0.77381	3.13e-08	0.0658618	0.125733	0.600401	1.06808	0	0	0
cg03593189	0.0559887	0.733607	0.657363	0.818693	3.15e-08	0.000918892	0.123017	0.99404	1.00092	0	0	0
cg07406897	0.0429479	1.26822	1.16583	1.37959	3.16e-08	-0.208722	0.138425	0.131597	0.811621	0	0	0
cg06712088	0.0528824	0.746349	0.672866	0.827858	3.16e-08	0.0319902	0.121806	0.792835	1.03251	0	0	0
cg15830431	0.0548918	1.35132	1.21459	1.50344	3.17e-08	0.190385	0.12561	0.129598	1.20972	1	0	0
cg17359753	0.0544265	1.35481	1.21662	1.5087	3.17e-08	0.184621	0.126453	0.144289	1.20276	1	0	0
cg18671037	0.0529795	0.746028	0.672448	0.827659	3.2e-08	-0.190635	0.113553	0.0931863	0.826434	1	0	0
cg12409937	0.0488958	1.3105	1.19074	1.4423	3.2e-08	0.0516095	0.127166	0.684857	1.05296	1	0	0
cg24921140	0.0669463	1.44804	1.26997	1.65106	3.2e-08	-0.0290996	0.123205	0.813287	0.97132	0	0	0
cg13387235	0.064412	0.700352	0.617289	0.794591	3.21e-08	-0.220369	0.120905	0.0683544	0.802223	1	0	0
cg09239524	0.0648653	1.43136	1.26048	1.62541	3.22e-08	0.13744	0.134054	0.305241	1.14733	1	0	0
cg20871586	0.0600698	1.4364	1.26331	1.6332	3.24e-08	0.161811	0.133011	0.223786	1.17564	1	0	0
cg23609905	0.0319486	1.19317	1.12074	1.27027	3.24e-08	-0.285833	0.163366	0.0801794	0.751388	0	0	0
cg19435720	0.0577845	0.717433	0.637749	0.807073	3.24e-08	0.13442	0.124997	0.282204	1.14387	0	0	0
cg05834639	0.0655127	0.726569	0.64877	0.813698	3.24e-08	0.0531295	0.126169	0.673683	1.05457	0	0	0
cg03160883	0.0498441	1.31719	1.19459	1.45236	3.25e-08	-0.411113	0.147352	0.00527079	0.662912	0	1	0
cg08733496	0.0591955	0.721399	0.642512	0.809971	3.26e-08	-0.263491	0.123455	0.0328172	0.768364	1	1	1
cg05180182	0.0502791	0.720956	0.64198	0.809648	3.26e-08	-0.177538	0.122998	0.148899	0.837329	1	0	0
cg10824354	0.0590859	1.32034	1.19644	1.45708	3.26e-08	0.0889464	0.131003	0.497161	1.09302	1	0	0
cg04445427	0.0558114	0.734628	0.658507	0.819547	3.28e-08	-0.173106	0.12484	0.165556	0.841049	1	0	0
cg18387659	0.0546939	0.739192	0.664051	0.822835	3.29e-08	-0.215016	0.120032	0.0732432	0.806529	1	0	0
cg25021530	0.0801657	0.642159	0.548789	0.751414	3.29e-08	0.190828	0.12418	0.124366	1.21025	0	0	0
cg02157015	0.0531662	1.34138	1.20864	1.4887	3.31e-08	-0.0164489	0.131341	0.900335	0.983686	0	0	0
cg19828789	0.0616168	0.737595	0.662073	0.821732	3.34e-08	-0.172103	0.114635	0.133275	0.841893	1	0	0
cg04743859	0.0551131	0.711571	0.630623	0.802909	3.34e-08	-0.155494	0.119167	0.191948	0.855992	1	0	0
cg25136124	0.0515418	0.752306	0.680021	0.832276	3.35e-08	-0.294991	0.113154	0.00913409	0.744538	1	1	1
cg22824738	0.0627919	0.684172	0.59794	0.782841	3.36e-08	-0.302501	0.12603	0.0163848	0.738968	1	1	1
cg02941697	0.068736	0.706999	0.62513	0.79959	3.36e-08	-0.0772371	0.120049	0.519976	0.92567	1	0	0
cg08854834	0.0611818	0.71335	0.632739	0.804231	3.37e-08	-0.345459	0.126256	0.00621589	0.707895	1	1	1
cg06269559	0.0639314	0.702623	0.619875	0.796417	3.38e-08	-0.338369	0.119978	0.00479855	0.712932	1	1	1
cg03797139	0.0489365	0.763281	0.693473	0.840116	3.39e-08	-0.264798	0.121702	0.0295702	0.767361	1	1	1
cg06212224	0.0534506	1.34314	1.20955	1.49148	3.4e-08	-0.0400234	0.124153	0.747171	0.960767	0	0	0
cg02789515	0.0686435	0.741609	0.666898	0.82469	3.43e-08	-0.332288	0.120487	0.00581771	0.717281	1	1	1
cg21806580	0.0541772	0.684709	0.598517	0.783313	3.43e-08	0.0036846	0.125177	0.976518	1.00369	0	0	0
cg26831416	0.0587413	0.723196	0.644548	0.811441	3.45e-08	-0.13294	0.119941	0.267697	0.875517	1	0	0
cg19702383	0.0578494	0.75598	0.684438	0.835	3.49e-08	-0.0501234	0.125003	0.688437	0.951112	1	0	0
cg14178380	0.0507237	0.726845	0.648934	0.814111	3.49e-08	0.103182	0.138815	0.457297	1.10869	0	0	0
cg00572243	0.0584536	0.724446	0.646026	0.812385	3.5e-08	-0.167682	0.114154	0.141857	0.845623	1	0	0
cg05190176	0.0693193	0.68233	0.595648	0.781627	3.5e-08	-0.154915	0.125417	0.216757	0.856488	1	0	0
cg15023513	0.0535313	0.744406	0.670261	0.826752	3.51e-08	-0.00816078	0.136873	0.952456	0.991872	1	0	0
cg18784113	0.0610576	0.714154	0.633606	0.804941	3.51e-08	0.0340118	0.119521	0.775975	1.0346	0	0	0
cg08545463	0.0574613	0.707479	0.625584	0.800094	3.52e-08	-0.15635	0.117962	0.185033	0.85526	1	0	0
cg13941027	0.0627673	0.750266	0.677413	0.830954	3.52e-08	-0.0498079	0.1264	0.693544	0.951412	1	0	0
cg20822884	0.0521165	0.728467	0.650876	0.815306	3.52e-08	0.220782	0.134123	0.0997413	1.24705	0	0	0
cg05324516	0.0520183	0.783083	0.717882	0.854207	3.53e-08	-0.102328	0.108615	0.346132	0.902733	1	0	0
cg13688399	0.0655868	0.750679	0.677917	0.831252	3.53e-08	-0.0908732	0.109237	0.405471	0.913134	1	0	0
cg18617808	0.0443552	0.696589	0.612561	0.792144	3.53e-08	-0.081593	0.130461	0.531696	0.921647	1	0	0
cg11639708	0.0675729	1.45136	1.27132	1.65688	3.54e-08	0.106701	0.140471	0.447496	1.1126	1	0	0
cg11812069	0.0517679	1.33023	1.20188	1.47228	3.55e-08	0.0300328	0.127101	0.813206	1.03049	1	0	0
cg25461186	0.0648003	0.699674	0.616222	0.794427	3.56e-08	-0.000169067	0.125429	0.998925	0.999831	1	0	0
cg06551177	0.0568699	0.730939	0.653843	0.817125	3.56e-08	0.129132	0.126862	0.308727	1.13784	0	0	0
cg12275370	0.0562863	0.733052	0.656402	0.818652	3.57e-08	-0.320114	0.128403	0.0126651	0.726066	1	1	1
cg19954234	0.0563495	0.733303	0.656708	0.818831	3.57e-08	-0.0625686	0.116316	0.590632	0.939349	1	0	0
cg18959478	0.05118	1.3258	1.19926	1.46569	3.58e-08	0.0958778	0.120286	0.425403	1.10062	1	0	0
cg17122311	0.0513393	0.75361	0.68147	0.833387	3.59e-08	-0.233635	0.120163	0.0518578	0.791651	1	0	0
cg11196333	0.0529108	0.733039	0.656372	0.818661	3.59e-08	-0.231167	0.126095	0.0667614	0.793607	1	0	0
cg25117941	0.0563641	1.33848	1.20663	1.48474	3.59e-08	-0.0736377	0.127994	0.565074	0.929008	0	0	0
cg12411704	0.0547469	0.739612	0.66436	0.823388	3.6e-08	-0.067427	0.122658	0.582514	0.934796	1	0	0
cg25949447	0.0631903	0.706034	0.623789	0.799122	3.62e-08	-0.1681	0.115767	0.146487	0.84527	1	0	0
cg14053030	0.06632	0.693999	0.609407	0.790334	3.63e-08	-0.055758	0.128933	0.665409	0.945768	1	0	0
cg18459339	0.0538901	0.743187	0.668693	0.82598	3.64e-08	-0.110699	0.117714	0.347011	0.895209	1	0	0
cg09326404	0.0601436	1.39269	1.23783	1.56693	3.64e-08	0.0584736	0.125968	0.642509	1.06022	1	0	0
cg17504989	0.0531743	0.746146	0.672298	0.828106	3.65e-08	-0.0783759	0.117885	0.506146	0.924617	1	0	0
cg26246947	0.0705363	0.678127	0.590569	0.778667	3.66e-08	-0.106476	0.126795	0.40105	0.898997	1	0	0
cg12118269	0.0683104	1.4566	1.27407	1.66527	3.68e-08	0.137037	0.129537	0.290102	1.14687	1	0	0
cg19917565	0.0613858	0.713218	0.632369	0.804403	3.68e-08	-0.0573117	0.127165	0.652214	0.9443	1	0	0
cg11093373	0.0586712	0.723989	0.645344	0.812219	3.69e-08	-0.08453	0.13185	0.521453	0.918944	1	0	0
cg23815853	0.0488207	0.710564	0.629159	0.802503	3.71e-08	-0.129298	0.123521	0.295203	0.878712	1	0	0
cg09535605	0.0620807	1.3083	1.18891	1.43967	3.71e-08	-0.0654607	0.129465	0.613122	0.936636	0	0	0
cg27315341	0.0615852	0.72768	0.649785	0.814912	3.73e-08	-0.117092	0.118376	0.322589	0.889504	1	0	0
cg17149350	0.0536104	0.74451	0.670251	0.826997	3.73e-08	-0.0694532	0.119984	0.562687	0.932904	1	0	0
cg26676090	0.0577662	0.712539	0.63152	0.803952	3.73e-08	0.109708	0.126072	0.384188	1.11595	0	0	0
cg01205267	0.0641498	0.702576	0.619568	0.796705	3.74e-08	-0.140329	0.127762	0.272047	0.869072	1	0	0
cg14415079	0.0525422	0.748943	0.675654	0.83018	3.75e-08	-0.164618	0.104803	0.116244	0.848218	1	0	0
cg23361659	0.0591838	0.750916	0.678067	0.831593	3.76e-08	-0.426974	0.116315	0.000241757	0.652481	1	1	1
cg08158662	0.0520665	0.722076	0.642992	0.810887	3.76e-08	-0.0252667	0.128289	0.843865	0.97505	1	0	0
cg19404190	0.0494886	0.761659	0.691251	0.839238	3.77e-08	-0.511804	0.121246	2.43e-05	0.599413	1	1	1
cg02911270	0.0476397	0.737526	0.661708	0.822031	3.78e-08	-0.303168	0.126356	0.0164255	0.738475	1	1	1
cg08518101	0.0553463	0.769464	0.70087	0.844772	3.78e-08	-0.0534204	0.112707	0.635517	0.947981	1	0	0
cg15177211	0.0587373	0.723715	0.64495	0.8121	3.79e-08	-0.315806	0.128462	0.0139575	0.729201	1	1	1
cg00267142	0.0645897	0.749943	0.676855	0.830925	3.79e-08	-0.238616	0.116953	0.0413238	0.787717	1	1	1
cg20466478	0.0587897	0.73973	0.664382	0.823623	3.79e-08	-0.219614	0.119295	0.0656313	0.802828	1	0	0
cg00232831	0.0548111	0.700992	0.617638	0.795594	3.79e-08	-0.14767	0.124469	0.235467	0.862716	1	0	0
cg16857825	0.0523179	0.723911	0.64519	0.812236	3.79e-08	-0.136064	0.123525	0.270674	0.872787	1	0	0
cg17578341	0.0559375	0.735166	0.658827	0.820351	3.8e-08	0.0688624	0.124118	0.579023	1.07129	0	0	0
cg16741128	0.056591	0.732562	0.655653	0.818493	3.81e-08	-0.0131753	0.123414	0.914982	0.986911	1	0	0
cg13055709	0.0494639	0.761848	0.691456	0.839406	3.82e-08	-0.0966429	0.12465	0.438154	0.90788	1	0	0
cg09540738	0.0639881	0.706156	0.623786	0.799403	3.84e-08	-0.011758	0.125465	0.925335	0.988311	1	0	0
cg10010103	0.0632812	0.703407	0.620497	0.797395	3.84e-08	0.0868775	0.12348	0.481699	1.09076	0	0	0
cg24338920	0.0599781	0.764641	0.694877	0.84141	3.85e-08	-0.159988	0.112833	0.156214	0.852154	1	0	0
cg06372522	0.059782	0.719896	0.6403	0.809387	3.85e-08	-0.0764635	0.117874	0.516539	0.926387	1	0	0
cg05073843	0.0488133	1.3906	1.23637	1.56407	3.85e-08	0.0834336	0.133672	0.532518	1.08701	1	0	0
cg03005191	0.0568527	0.731634	0.654487	0.817876	3.88e-08	-0.0755736	0.127188	0.552386	0.927211	1	0	0
cg13577072	0.0459599	0.747863	0.674255	0.829506	3.89e-08	-0.129681	0.130603	0.320739	0.878376	1	0	0
cg24950749	0.0528639	0.780331	0.714268	0.852504	3.89e-08	-0.11098	0.122399	0.364563	0.894957	1	0	0
cg08235522	0.0451333	0.776784	0.709871	0.850005	3.89e-08	0.0244132	0.122726	0.842322	1.02471	0	0	0
cg17272838	0.0572674	0.729999	0.652494	0.816711	3.9e-08	-0.258316	0.11707	0.0273486	0.772351	1	1	1
cg13442969	0.0394574	0.660011	0.569104	0.765439	3.9e-08	-0.0802552	0.138184	0.561386	0.922881	1	0	0
cg26725838	0.0756099	1.34665	1.21103	1.49747	3.9e-08	0.0407101	0.133966	0.761216	1.04155	1	0	0
cg20039407	0.054161	1.24214	1.1497	1.34201	3.9e-08	-0.176635	0.137834	0.200016	0.838086	0	0	0
cg14423617	0.0504057	0.764959	0.695229	0.841682	3.92e-08	-0.105141	0.122725	0.391601	0.900198	1	0	0
cg15127879	0.0487666	0.758099	0.686784	0.836818	3.92e-08	0.0553896	0.119359	0.642604	1.05695	0	0	0
cg27278668	0.0437279	0.72021	0.640628	0.809677	3.93e-08	-0.355517	0.119078	0.00283037	0.700811	1	1	1
cg27536453	0.0597425	1.27156	1.16712	1.38535	3.93e-08	-0.327109	0.188295	0.0823499	0.721005	0	0	0
cg08937734	0.0569285	0.70787	0.625766	0.800746	3.96e-08	-0.193433	0.117644	0.10013	0.824125	1	0	0
cg24873562	0.0629008	1.3671	1.22276	1.52847	3.96e-08	0.0295392	0.136591	0.828785	1.02998	1	0	0
cg24635971	0.0681434	0.687794	0.601803	0.786072	3.97e-08	-0.0915833	0.137278	0.504685	0.912485	1	0	0
cg24314434	0.0604369	0.717581	0.637422	0.807821	3.99e-08	-0.0375506	0.120815	0.755945	0.963146	1	0	0
cg01735991	0.0621821	0.710751	0.629198	0.802873	4e-08	-0.279578	0.122285	0.0222376	0.756103	1	1	1
cg24247667	0.0470357	0.738222	0.662406	0.822715	4.03e-08	-0.132754	0.115257	0.249399	0.875681	1	0	0
cg06503456	0.0552896	0.772434	0.704409	0.847029	4.03e-08	0.00795242	0.121431	0.947784	1.00798	0	0	0
cg07828472	0.0594182	0.721693	0.642355	0.810829	4.04e-08	-0.17487	0.127803	0.171224	0.839566	1	0	0
cg23218363	0.0559803	0.706974	0.624631	0.800173	4.06e-08	-0.350064	0.126312	0.00558113	0.704643	1	1	1
cg10087092	0.0631814	1.35967	1.21838	1.51734	4.06e-08	0.173558	0.119822	0.147485	1.18953	1	0	0
cg16844661	0.0531707	0.746905	0.672986	0.828942	4.06e-08	0.0296129	0.12091	0.80652	1.03006	0	0	0
cg22464570	0.0474483	0.770795	0.702346	0.845916	4.1e-08	-0.317032	0.100424	0.00159427	0.728307	1	1	1
cg23038338	0.0624571	0.709867	0.628077	0.802306	4.1e-08	-0.159398	0.12711	0.209836	0.852657	1	0	0
cg19266578	0.0587516	1.38033	1.23019	1.54879	4.11e-08	0.179879	0.121579	0.139001	1.19707	1	0	0
cg18565783	0.0432789	1.26798	1.16486	1.38023	4.11e-08	-0.0513894	0.129698	0.69194	0.949909	0	0	0
cg11077171	0.0606369	0.717042	0.636694	0.807531	4.12e-08	-0.313652	0.123721	0.0112395	0.730773	1	1	1
cg11944518	0.0586293	0.724983	0.646283	0.813267	4.12e-08	-0.129145	0.118478	0.2757	0.878847	1	0	0
cg07613268	0.0584819	0.734699	0.658065	0.820258	4.13e-08	-0.304299	0.119709	0.0110221	0.737641	1	1	1
cg23402524	0.0646476	0.67957	0.591954	0.780155	4.13e-08	-0.258094	0.121016	0.0329467	0.772522	1	1	1
cg11747081	0.0562041	0.701445	0.617968	0.7962	4.13e-08	-0.251449	0.126403	0.0466721	0.777673	1	1	1
cg04315771	0.074155	0.725572	0.646995	0.813693	4.13e-08	-0.230912	0.127035	0.0691098	0.793809	1	0	0
cg17131262	0.0618191	0.665807	0.575742	0.769962	4.13e-08	-0.197263	0.134607	0.142791	0.820975	1	0	0
cg25054180	0.0704259	0.71242	0.631126	0.804187	4.13e-08	0.0784577	0.126344	0.534609	1.08162	0	0	0
cg21495653	0.0903161	0.609374	0.510513	0.72738	4.15e-08	-0.0837426	0.125903	0.505963	0.919668	1	0	0
cg26993035	0.0634475	0.706137	0.623566	0.799642	4.16e-08	-0.0686746	0.121888	0.573147	0.93363	1	0	0
cg08356637	0.0591096	0.707025	0.624623	0.800297	4.17e-08	-0.32512	0.130469	0.0127049	0.722441	1	1	1
cg13889620	0.0632243	0.723157	0.644048	0.811982	4.17e-08	-0.172353	0.116621	0.139437	0.841682	1	0	0
cg19414040	0.0477131	0.727324	0.649084	0.814997	4.18e-08	-0.127125	0.120842	0.292802	0.880623	1	0	0
cg14118583	0.058068	0.769809	0.701084	0.845272	4.18e-08	-0.0473029	0.12847	0.712722	0.953798	1	0	0
cg12508624	0.0606035	1.39414	1.238	1.56997	4.19e-08	-0.0164453	0.127054	0.897013	0.983689	0	0	0
cg22008130	0.0540893	0.743394	0.668618	0.826532	4.2e-08	-0.0570931	0.124552	0.646674	0.944506	1	0	0
cg20271517	0.0580558	1.37475	1.22689	1.54042	4.2e-08	-0.0101117	0.125025	0.93554	0.989939	0	0	0
cg15961466	0.0557648	1.35758	1.21702	1.51437	4.21e-08	0.221954	0.118645	0.061381	1.24851	1	0	0
cg01893560	0.0679477	0.702904	0.619649	0.797345	4.23e-08	-0.100097	0.125825	0.426308	0.90475	1	0	0
cg04611161	0.0643209	0.689068	0.603149	0.787226	4.23e-08	0.150804	0.120807	0.21192	1.16277	0	0	0
cg16375820	0.0698358	1.4663	1.27873	1.68139	4.24e-08	0.0218529	0.125476	0.86174	1.02209	1	0	0
cg02274788	0.0710783	0.677384	0.589296	0.778641	4.25e-08	0.114261	0.11992	0.340687	1.12104	0	0	0
cg13999458	0.0799287	0.64535	0.551772	0.754798	4.27e-08	-0.33973	0.133202	0.0107569	0.711962	1	1	1
cg04564000	0.0569029	0.732133	0.654869	0.818514	4.27e-08	-0.0508109	0.120432	0.673094	0.950458	1	0	0
cg14792155	0.0555341	0.737645	0.661572	0.822467	4.27e-08	0.133516	0.135247	0.323544	1.14284	0	0	0
cg21501167	0.0624979	0.710067	0.628205	0.802597	4.29e-08	-0.237666	0.127147	0.0615921	0.788466	1	0	0
cg05180443	0.0541969	1.34569	1.21008	1.49651	4.29e-08	0.0315363	0.137517	0.818616	1.03204	1	0	0
[truncated: 538 more rows]

## Sheet: Table S3b
Table S3b.Primary EWAS (N=1992 cases), age and ER status-adjusted model, and replication results in GSE141441 (N=165 triple-negative tumours)
CpG	All cases; age and ER status-adjusted model (N cases = 1992; N deaths = 272)					GSE141441 (N cases = 165; N events = 69)				Replication
	SD	HR	Inf95CI	Sup95CI	P	Coef	SE	P	HR	Same direction (yes=1; no=0)	P<0.05 (yes=1; no=0)	Replicated (yes=1; no=0)
cg11601197	0.0413605	0.747513	0.689307	0.810634	1.98152e-12	-0.302313	0.114855	0.00848507	0.739106	1	1	1
cg02744945	0.0643071	0.636858	0.561441	0.722405	2.27536e-12	-0.150484	0.124607	0.227175	0.860291	1	0	0
cg17712416	0.0405823	0.753243	0.695651	0.815603	2.89867e-12	-0.367674	0.112261	0.00105599	0.692343	1	1	1
cg16461335	0.0614907	0.65102	0.577103	0.734405	2.94874e-12	0.0116609	0.126135	0.926342	1.01173	0	0	0
cg19640779	0.05652	0.68028	0.608944	0.759972	9.34868e-12	-0.338357	0.111538	0.00241689	0.712941	1	1	1
cg17800124	0.0503263	0.715262	0.648078	0.78941	2.76296e-11	-0.415196	0.111257	0.000190063	0.660211	1	1	1
cg07456681	0.0662302	0.644823	0.566325	0.734203	3.47125e-11	-0.155565	0.119917	0.194537	0.855932	1	0	0
cg11113931	0.0625479	0.663685	0.587112	0.750244	5.59613e-11	-0.355202	0.128317	0.00563733	0.701031	1	1	1
cg03015790	0.0563259	1.44365	1.29276	1.61216	7.08822e-11	0.166	0.123809	0.179996	1.18057	1	0	0
cg13883981	0.0535135	0.705618	0.635359	0.783647	7.23196e-11	-0.0101658	0.118566	0.931674	0.989886	1	0	0
cg03910767	0.0523808	1.40659	1.26935	1.55867	7.35668e-11	0.0146916	0.128801	0.909187	1.0148	1	0	0
cg24777065	0.0351372	1.25528	1.17174	1.34477	9.76897e-11	-0.243868	0.152568	0.109949	0.783591	0	0	0
cg04295172	0.0535056	0.709661	0.639009	0.788125	1.45574e-10	-0.17675	0.124708	0.156393	0.837989	1	0	0
cg24004478	0.0317162	1.22354	1.14979	1.30201	2.00484e-10	0.0959691	0.158227	0.544164	1.10073	1	0	0
cg05437648	0.0539971	0.709821	0.638538	0.789062	2.18961e-10	-0.391961	0.120838	0.00117993	0.67573	1	1	1
cg17150663	0.0570682	0.696685	0.62296	0.779136	2.40191e-10	-0.132428	0.116782	0.256807	0.875966	1	0	0
cg17641904	0.0563213	1.42783	1.2786	1.59447	2.55514e-10	-0.038948	0.138313	0.778256	0.961801	0	0	0
cg07854457	0.0696348	0.643863	0.561721	0.738018	2.57292e-10	-0.0622498	0.126301	0.622104	0.939648	1	0	0
cg00936699	0.0504901	0.727199	0.658683	0.802843	2.80403e-10	-0.17168	0.132889	0.196392	0.842249	1	0	0
cg21799206	0.0373212	1.26504	1.1758	1.36104	2.98829e-10	-0.138186	0.149163	0.354234	0.870937	0	0	0
cg03458229	0.0514969	0.723035	0.65362	0.799823	3.02653e-10	-0.175921	0.117694	0.134986	0.838684	1	0	0
cg10812247	0.0621608	0.676116	0.598563	0.763717	3.04594e-10	-0.30565	0.123808	0.013559	0.736645	1	1	1
cg26316082	0.0321905	1.22354	1.14873	1.30322	3.67402e-10	-0.477238	0.242717	0.0492723	0.620495	0	1	0
cg09866695	0.062165	0.678066	0.600285	0.765927	4.11357e-10	-0.225249	0.121923	0.0646786	0.798318	1	0	0
cg01626326	0.0425032	1.30414	1.1999	1.41743	4.16766e-10	0.114224	0.127504	0.370336	1.121	1	0	0
cg00501904	0.056549	0.702928	0.629182	0.785318	4.56022e-10	-0.106956	0.136076	0.431866	0.898565	1	0	0
cg25353399	0.068269	0.653447	0.57161	0.747001	4.58768e-10	-0.212237	0.134959	0.11581	0.808773	1	0	0
cg10626556	0.0571075	0.70126	0.627002	0.784312	5.15907e-10	-0.184122	0.125997	0.143928	0.831834	1	0	0
cg19411734	0.0626557	0.677712	0.599394	0.766263	5.33045e-10	-0.0589887	0.125951	0.639537	0.942717	1	0	0
cg01196858	0.0653395	0.667013	0.586837	0.758144	5.73471e-10	-0.0851548	0.125571	0.497683	0.91837	1	0	0
cg23029193	0.0412211	1.29104	1.19084	1.39967	5.75404e-10	0.154359	0.120078	0.198623	1.16691	1	0	0
cg15403900	0.0616724	0.682532	0.604822	0.770227	5.89732e-10	-0.263845	0.142276	0.0636747	0.768093	1	0	0
cg12878796	0.057526	0.70091	0.626176	0.784565	6.50649e-10	-0.14848	0.135311	0.272499	0.862017	1	0	0
cg18558767	0.0578764	0.699684	0.624651	0.78373	6.80762e-10	-0.105155	0.125865	0.40346	0.900185	1	0	0
cg09289459	0.0505674	0.732092	0.663014	0.808367	6.96008e-10	-0.080063	0.122674	0.513984	0.923058	1	0	0
cg21576728	0.0739644	0.634022	0.548461	0.732931	7.24319e-10	-0.0737503	0.124817	0.554609	0.928904	1	0	0
cg25520146	0.0570901	0.703944	0.629423	0.787287	7.78901e-10	-0.128201	0.121122	0.289854	0.879677	1	0	0
cg04471919	0.0687495	0.655483	0.572851	0.750034	8.05728e-10	-0.0944511	0.122532	0.44081	0.909872	1	0	0
cg07066163	0.0592179	0.695674	0.61944	0.781289	8.91122e-10	-0.149535	0.125173	0.232234	0.861109	1	0	0
cg20057676	0.057924	1.42591	1.27288	1.59733	9.04568e-10	0.0664575	0.135482	0.623762	1.06872	1	0	0
cg06985056	0.074362	0.63505	0.548922	0.734691	1.02182e-09	-0.0450845	0.123166	0.714331	0.955917	1	0	0
cg26822986	0.0481746	1.34115	1.22031	1.47395	1.10807e-09	-0.00672407	0.121308	0.955796	0.993298	0	0	0
cg11065036	0.059018	0.69818	0.621915	0.783797	1.14614e-09	-0.1816	0.122639	0.13867	0.833935	1	0	0
cg05072470	0.0605445	1.44209	1.28072	1.62378	1.47904e-09	0.201257	0.135847	0.138476	1.22294	1	0	0
cg05306107	0.047625	0.750746	0.68384	0.824198	1.74762e-09	-0.21517	0.115813	0.0631836	0.806405	1	0	0
cg03187411	0.0695614	0.658631	0.574687	0.754836	1.93434e-09	-0.179364	0.12375	0.147224	0.835801	1	0	0
cg02717150	0.055772	1.39671	1.25208	1.55804	2.0885e-09	0.0113002	0.133964	0.932776	1.01136	1	0	0
cg19194095	0.0508932	0.737316	0.667319	0.814656	2.12694e-09	0.0832765	0.12226	0.495781	1.08684	0	0	0
cg21184711	0.0577298	0.707975	0.632235	0.792789	2.20244e-09	0.0897039	0.124645	0.471724	1.09385	0	0	0
cg24650915	0.058563	0.704845	0.628412	0.790574	2.33399e-09	-0.216942	0.121671	0.0745828	0.804977	1	0	0
cg25266629	0.0714457	1.53058	1.33058	1.76064	2.5593e-09	0.103088	0.127969	0.420488	1.10859	1	0	0
cg02422282	0.0536399	0.726474	0.653975	0.807009	2.5632e-09	-0.0181569	0.112824	0.872148	0.982007	1	0	0
cg03985360	0.0724352	0.649652	0.563669	0.748752	2.60803e-09	-0.186026	0.12189	0.126966	0.830252	1	0	0
cg19502920	0.0528955	1.37012	1.23519	1.51979	2.62885e-09	-0.0851835	0.137603	0.53588	0.918344	0	0	0
cg25471639	0.0627962	0.688132	0.608443	0.778259	2.64595e-09	0.107551	0.134824	0.425034	1.11355	0	0	0
cg20737185	0.0503176	1.34884	1.22216	1.48864	2.72941e-09	-0.0992437	0.137549	0.470594	0.905522	0	0	0
cg03378876	0.0506316	1.35065	1.22305	1.49155	2.90891e-09	-0.11629	0.136556	0.394441	0.890217	0	0	0
cg04427816	0.0504436	0.74276	0.672839	0.819948	3.73907e-09	-0.30957	0.117002	0.00814851	0.733762	1	1	1
cg15847249	0.0655239	0.679617	0.59771	0.772749	3.75984e-09	-0.14922	0.13861	0.281682	0.861379	1	0	0
cg02087985	0.0652124	0.681266	0.599526	0.774151	3.97063e-09	-0.210772	0.126064	0.094536	0.809959	1	0	0
cg01815090	0.0479112	0.754313	0.686704	0.828578	3.98512e-09	-0.213782	0.119713	0.0741331	0.807525	1	0	0
cg06128142	0.0560038	0.71933	0.644551	0.802784	4.04442e-09	-0.086852	0.124981	0.487103	0.916813	1	0	0
cg24812837	0.0722957	1.52913	1.32711	1.76191	4.24091e-09	0.0800355	0.128376	0.532992	1.08333	1	0	0
cg17052212	0.0541779	0.727531	0.654237	0.809036	4.3218e-09	-0.142413	0.114866	0.215043	0.867263	1	0	0
cg13736068	0.0452689	1.30394	1.19323	1.42492	4.55957e-09	0.189549	0.107327	0.0773804	1.2087	1	0	0
cg25326378	0.0614891	0.697553	0.618355	0.786895	4.6967e-09	-0.0239415	0.132042	0.856119	0.976343	1	0	0
cg24361823	0.0559731	0.720991	0.646078	0.804589	5.08385e-09	-0.0327511	0.115768	0.777252	0.967779	1	0	0
cg02046017	0.0624798	0.694551	0.614499	0.785031	5.42021e-09	-0.146498	0.128216	0.253212	0.863728	1	0	0
cg19100138	0.0439292	1.29198	1.18539	1.40814	5.494e-09	-0.221911	0.145553	0.127357	0.800986	0	0	0
cg03575373	0.056179	0.72084	0.645683	0.804746	5.65383e-09	-0.245425	0.126952	0.053211	0.782372	1	0	0
cg02855045	0.0581659	0.712564	0.635789	0.79861	5.67094e-09	-0.0702819	0.110073	0.523147	0.932131	1	0	0
cg15161225	0.0438907	0.774538	0.710695	0.844117	5.8492e-09	-0.194049	0.107069	0.0699293	0.823617	1	0	0
cg07051833	0.0625269	0.694927	0.614775	0.785529	5.86101e-09	0.000653669	0.126451	0.995875	1.00065	0	0	0
cg19823504	0.0597954	0.706703	0.628549	0.794575	6.41571e-09	-0.275914	0.12591	0.0284255	0.758878	1	1	1
cg10799386	0.0606432	0.703258	0.624446	0.792017	6.43823e-09	0.0244246	0.12429	0.844208	1.02473	0	0	0
cg14552106	0.0548352	1.37453	1.23447	1.53049	6.58157e-09	0.244475	0.126565	0.053406	1.27695	1	0	0
cg25203980	0.0402482	0.791983	0.731908	0.856989	6.8552e-09	-0.278259	0.114943	0.0154849	0.757101	1	1	1
cg04389921	0.0544782	0.729339	0.655477	0.811524	6.89602e-09	0.0711274	0.126305	0.57334	1.07372	0	0	0
cg13479215	0.0567709	0.719766	0.643974	0.80448	6.94691e-09	-0.0867011	0.116498	0.456738	0.916951	1	0	0
cg03131171	0.060452	1.41902	1.26047	1.59752	7.07254e-09	-0.348802	0.158981	0.028237	0.705533	0	1	0
cg21248405	0.0681199	0.674364	0.590079	0.770687	7.30686e-09	-0.12437	0.123102	0.312353	0.883053	1	0	0
cg14421371	0.0524113	0.738859	0.666728	0.818793	7.71909e-09	0.00340148	0.128087	0.978814	1.00341	0	0	0
cg02450004	0.0443195	1.29157	1.18411	1.40877	7.78894e-09	-0.155664	0.142216	0.273709	0.855846	0	0	0
cg04443870	0.0560623	0.723589	0.648294	0.80763	7.8838e-09	-0.0474186	0.121478	0.69628	0.953688	1	0	0
cg12987910	0.0514987	1.34575	1.21654	1.48867	8.10913e-09	0.0833463	0.124164	0.502055	1.08692	1	0	0
cg01424997	0.0601282	0.707082	0.628476	0.79552	8.19034e-09	-0.130954	0.117964	0.266948	0.877258	1	0	0
cg03401357	0.0632285	1.43961	1.27182	1.62955	8.27139e-09	0.000193277	0.134451	0.998853	1.00019	1	0	0
cg19727124	0.060071	0.707532	0.628946	0.795937	8.44153e-09	-0.297547	0.120188	0.0132979	0.742637	1	1	1
cg26405545	0.0517143	0.742637	0.671054	0.821856	8.73194e-09	-0.270491	0.11622	0.0199437	0.763005	1	1	1
cg16434940	0.0446096	0.774124	0.709315	0.844855	9.51262e-09	-0.243421	0.124588	0.0507247	0.783942	1	0	0
cg02343503	0.0455942	1.29906	1.188	1.42049	9.55683e-09	-0.176847	0.151363	0.24266	0.837908	0	0	0
cg08726446	0.049861	1.33098	1.20706	1.46761	9.79824e-09	0.091721	0.122674	0.454652	1.09606	1	0	0
cg18222192	0.0716773	0.663002	0.576107	0.763004	9.82526e-09	-0.147663	0.121816	0.225444	0.862722	1	0	0
cg04936009	0.0624618	0.699621	0.619007	0.790734	1.07177e-08	-0.181368	0.128847	0.159243	0.834128	1	0	0
cg22356198	0.0365493	1.23241	1.14722	1.32394	1.08012e-08	-0.209057	0.146669	0.15405	0.811349	0	0	0
cg22378678	0.0642398	0.692949	0.61097	0.785927	1.13084e-08	-0.216142	0.125626	0.0853375	0.805621	1	0	0
cg03037684	0.0595157	0.711987	0.633595	0.800077	1.14532e-08	-0.0241014	0.124761	0.846817	0.976187	1	0	0
cg18413212	0.0579177	0.71871	0.641585	0.805107	1.17808e-08	-0.244106	0.121314	0.0442006	0.783405	1	1	1
cg13587908	0.0711415	0.666771	0.579991	0.766536	1.2178e-08	0.133542	0.137979	0.333121	1.14287	0	0	0
cg06159375	0.0529665	0.739569	0.666643	0.820472	1.2278e-08	-0.128967	0.122715	0.293282	0.879003	1	0	0
cg13965612	0.0547032	0.732749	0.658252	0.815678	1.31321e-08	-0.123495	0.13294	0.352915	0.883826	1	0	0
cg21374547	0.0509304	1.33543	1.20857	1.47562	1.35122e-08	-0.0848513	0.132853	0.523029	0.918649	0	0	0
cg09093212	0.0539521	0.73619	0.662317	0.818303	1.37367e-08	-0.255511	0.120623	0.0341525	0.77452	1	1	1
cg04878240	0.0559266	0.728052	0.652466	0.812395	1.38706e-08	-0.123633	0.116957	0.290475	0.883704	1	0	0
cg24846807	0.0598306	0.712476	0.63364	0.801121	1.46045e-08	-0.133156	0.124596	0.285207	0.875329	1	0	0
cg12580943	0.054888	0.732973	0.658214	0.816223	1.51688e-08	-0.266732	0.127844	0.0369438	0.765878	1	1	1
cg15688070	0.0613748	0.706778	0.626673	0.797123	1.56383e-08	-0.28921	0.134198	0.0311546	0.748855	1	1	1
cg23568324	0.060709	0.709468	0.629879	0.799113	1.56883e-08	-0.27539	0.124381	0.0268228	0.759276	1	1	1
cg07103093	0.0519378	1.34118	1.21137	1.48489	1.58698e-08	0.045232	0.127081	0.721894	1.04627	1	0	0
cg26548729	0.0514321	0.74785	0.676138	0.827168	1.61146e-08	-0.099451	0.112943	0.378564	0.905334	1	0	0
cg01945840	0.0370001	0.811465	0.754702	0.872498	1.63933e-08	-0.247399	0.107865	0.0218136	0.780829	1	1	1
cg21660861	0.0564976	0.727023	0.650815	0.812155	1.67427e-08	-0.225385	0.125168	0.0717561	0.798209	1	0	0
cg11265839	0.0597686	0.713858	0.634946	0.802577	1.70434e-08	-0.313159	0.116502	0.00718756	0.731133	1	1	1
cg18392783	0.0491451	1.31913	1.198	1.45251	1.74235e-08	0.080261	0.123894	0.5171	1.08357	1	0	0
cg13557668	0.055546	1.36743	1.22638	1.5247	1.76348e-08	0.214133	0.131049	0.102262	1.23879	1	0	0
cg03880173	0.0538044	1.35401	1.21849	1.5046	1.77295e-08	-0.144367	0.140015	0.302499	0.86557	0	0	0
cg06894612	0.0564705	0.727589	0.651356	0.812744	1.78553e-08	-0.31203	0.113111	0.00580485	0.73196	1	1	1
cg11669824	0.0418801	0.790073	0.727812	0.857661	1.84127e-08	-0.111878	0.135565	0.409217	0.894154	1	0	0
cg06757356	0.0714691	0.668953	0.581515	0.769538	1.85079e-08	-0.00896368	0.126259	0.943402	0.991076	1	0	0
cg04906886	0.0609635	0.709796	0.629856	0.799882	1.88023e-08	-0.263179	0.116065	0.0233582	0.768604	1	1	1
cg14009912	0.0694983	0.676731	0.590553	0.775485	1.92552e-08	-0.0148555	0.120646	0.902002	0.985254	1	0	0
cg27104671	0.0596809	0.715164	0.636217	0.803908	1.94007e-08	-0.00273544	0.134102	0.983726	0.997268	1	0	0
cg08455781	0.0567396	0.727104	0.650579	0.812631	1.94709e-08	-0.24196	0.122098	0.047514	0.785087	1	1	1
cg07915434	0.0599368	1.39984	1.24468	1.57433	2.00192e-08	0.125728	0.126076	0.318649	1.13397	1	0	0
cg09610644	0.0535912	0.740345	0.666526	0.82234	2.02503e-08	-0.168541	0.121	0.163648	0.844896	1	0	0
cg23106115	0.0635883	0.700044	0.618014	0.79296	2.04499e-08	-0.239011	0.124894	0.0556564	0.787406	1	0	0
cg03281139	0.0867762	0.614697	0.518558	0.72866	2.04883e-08	-0.414624	0.145912	0.00448876	0.660589	1	1	1
cg02503824	0.0576941	1.382	1.23423	1.54745	2.05075e-08	0.120104	0.118469	0.310678	1.12761	1	0	0
cg18407963	0.0537492	0.739863	0.665886	0.822059	2.07684e-08	0.27796	0.156387	0.0755052	1.32043	0	0	0
cg04092699	0.0533004	0.741731	0.668155	0.823409	2.07807e-08	-0.0772323	0.128431	0.547605	0.925675	1	0	0
cg24959938	0.0487258	0.761036	0.691719	0.837299	2.0908e-08	0.11076	0.135013	0.41201	1.11713	0	0	0
cg06024930	0.0610946	0.710124	0.629986	0.800457	2.10634e-08	-0.197851	0.118837	0.0959353	0.820492	1	0	0
cg08161138	0.0531044	0.743019	0.669572	0.824523	2.22686e-08	0.0489261	0.137142	0.721274	1.05014	0	0	0
cg07011110	0.0573482	0.725728	0.648573	0.812061	2.26992e-08	-0.227868	0.111262	0.0405573	0.796229	1	1	1
cg25439883	0.0651092	0.694918	0.611663	0.789504	2.27046e-08	-0.151929	0.121829	0.212372	0.859049	1	0	0
cg27304415	0.0587072	0.720359	0.642062	0.808203	2.30815e-08	-0.219297	0.120299	0.0683135	0.803083	1	0	0
cg01704534	0.065895	0.692152	0.608291	0.787574	2.35211e-08	0.00799593	0.136102	0.953152	1.00803	0	0	0
cg10941822	0.0303444	1.18463	1.11623	1.25723	2.35432e-08	-0.585967	0.27309	0.0318976	0.556568	0	1	0
cg06019726	0.0677019	0.685219	0.60007	0.782452	2.35667e-08	-0.264559	0.118403	0.0254569	0.767544	1	1	1
cg16814416	0.0606063	0.712948	0.633096	0.802872	2.36814e-08	-0.214064	0.120256	0.0750647	0.807296	1	0	0
cg15511120	0.0647428	0.69704	0.613972	0.791347	2.48177e-08	-0.320342	0.122634	0.00899694	0.725901	1	1	1
cg12631737	0.0357673	1.22062	1.13798	1.30926	2.49279e-08	0.0443271	0.11627	0.703023	1.04532	1	0	0
cg20297053	0.0557403	0.73298	0.657122	0.817595	2.50493e-08	-0.106354	0.129319	0.410842	0.899106	1	0	0
cg16308148	0.0513751	0.751072	0.679127	0.830639	2.52081e-08	0.0840467	0.121512	0.489142	1.08768	0	0	0
cg22399703	0.0745992	0.659979	0.570205	0.763887	2.54165e-08	-0.201182	0.125764	0.109671	0.817764	1	0	0
cg05458220	0.0755932	0.656424	0.56603	0.761254	2.56797e-08	-0.106075	0.131646	0.420379	0.899357	1	0	0
cg05296619	0.0609608	0.712195	0.631988	0.802581	2.58316e-08	-0.126999	0.12311	0.302263	0.880734	1	0	0
cg10087754	0.0637873	0.701103	0.618709	0.794471	2.59252e-08	-0.189985	0.124375	0.126635	0.826972	1	0	0
cg18155840	0.0367021	1.22667	1.14153	1.31816	2.59762e-08	-0.176104	0.14166	0.213815	0.838531	0	0	0
cg27488648	0.0599663	0.71628	0.636853	0.805613	2.62866e-08	0.0486412	0.132884	0.714332	1.04984	0	0	0
cg11993230	0.0499047	1.31946	1.19652	1.45504	2.77476e-08	0.0308026	0.121065	0.799163	1.03128	1	0	0
cg06685950	0.0518284	0.749875	0.677442	0.830052	2.79392e-08	-0.184601	0.114736	0.107634	0.831436	1	0	0
cg00927495	0.0587808	1.38587	1.23506	1.55509	2.83125e-08	0.152527	0.122974	0.214855	1.16477	1	0	0
cg18443571	0.0653068	0.695952	0.612337	0.790986	2.85144e-08	-0.345081	0.12218	0.0047373	0.708163	1	1	1
cg18476517	0.0643022	0.699909	0.617031	0.793918	2.87503e-08	-0.0731831	0.125247	0.559011	0.929431	1	0	0
cg19336191	0.0656633	0.69483	0.610922	0.790262	2.94323e-08	-0.199267	0.125794	0.113179	0.819331	1	0	0
cg06873498	0.0558763	0.733846	0.657723	0.818779	3.05515e-08	-0.154023	0.136376	0.258731	0.857252	1	0	0
cg23915912	0.0519191	0.750208	0.677623	0.830568	3.10105e-08	0.00225132	0.119017	0.984908	1.00225	0	0	0
cg23791611	0.0362074	1.22188	1.13818	1.31174	3.11966e-08	-0.215239	0.147684	0.144997	0.806349	0	0	0
cg02578560	0.039896	1.24704	1.15324	1.34846	3.1361e-08	-0.103103	0.131639	0.433492	0.902034	0	0	0
cg20486551	0.0567297	0.730604	0.653722	0.816526	3.14834e-08	0.0671149	0.137855	0.626363	1.06942	0	0	0
cg17966227	0.05825	0.724673	0.646487	0.812316	3.23007e-08	-0.20698	0.115697	0.0736166	0.813036	1	0	0
cg22946147	0.063757	0.702967	0.620391	0.796536	3.24007e-08	-0.144782	0.123539	0.241216	0.865211	1	0	0
cg06740209	0.0665782	0.692273	0.607584	0.788767	3.3146e-08	-0.177271	0.130639	0.174795	0.837553	1	0	0
cg06669276	0.0526522	1.33737	1.20624	1.48275	3.3673e-08	0.0691282	0.128773	0.59139	1.07157	1	0	0
cg17835455	0.0651068	0.698087	0.614456	0.793101	3.38353e-08	-0.0405155	0.121713	0.739226	0.960294	1	0	0
cg06104859	0.0568685	0.730643	0.65358	0.816793	3.41851e-08	-0.104511	0.119543	0.381981	0.900765	1	0	0
cg01101472	0.0548769	0.739075	0.663709	0.823	3.59441e-08	0.0266944	0.133395	0.841391	1.02705	0	0	0
cg14178380	0.0567633	0.731477	0.654461	0.817557	3.61599e-08	0.103182	0.138815	0.457297	1.10869	0	0	0
cg14097773	0.0574906	0.728629	0.650984	0.815535	3.65382e-08	0.0392174	0.120047	0.743908	1.04	0	0	0
cg12792775	0.082371	0.635596	0.540837	0.746956	3.7583e-08	-0.150575	0.134488	0.262876	0.860213	1	0	0
cg19602694	0.052515	0.749077	0.675812	0.830285	3.76495e-08	-0.321775	0.121425	0.00804971	0.724862	1	1	1
cg03938353	0.0427132	0.790603	0.727111	0.859639	3.77934e-08	-0.049122	0.133199	0.712287	0.952065	1	0	0
cg06340161	0.0553945	0.737476	0.661601	0.822053	3.85592e-08	-0.0623311	0.127952	0.626155	0.939572	1	0	0
cg12807237	0.06392	0.703722	0.620858	0.797645	3.8615e-08	-0.0197041	0.128359	0.877998	0.980489	1	0	0
cg14484045	0.047388	0.770728	0.702367	0.845742	3.89642e-08	-0.0848948	0.114472	0.458317	0.918609	1	0	0
cg22538712	0.0567126	0.732232	0.655202	0.818319	3.89873e-08	-0.356949	0.118827	0.002665	0.699808	1	1	1
cg27536453	0.0443734	1.276	1.16972	1.39195	3.9569e-08	-0.327109	0.188295	0.0823499	0.721005	0	0	0
cg03524627	0.0338065	1.20399	1.1268	1.28647	3.99012e-08	-0.0360653	0.12475	0.772504	0.964577	0	0	0
cg08725962	0.04067	1.25022	1.15443	1.35395	3.99736e-08	-0.256545	0.166891	0.124243	0.77372	0	0	0
cg10410146	0.0661132	0.695585	0.611047	0.791818	4.00521e-08	-0.311384	0.120267	0.00962269	0.732432	1	1	1
cg13342634	0.0682294	0.687597	0.60153	0.785979	4.02844e-08	-0.27884	0.130171	0.0321858	0.756661	1	1	1
cg20459430	0.0497793	0.760895	0.690165	0.838875	4.03249e-08	-0.157267	0.113076	0.164284	0.854476	1	0	0
cg03382549	0.0683284	0.687248	0.601108	0.785733	4.04041e-08	-0.139512	0.123555	0.258835	0.869783	1	0	0
cg27129012	0.0561533	0.734765	0.658189	0.82025	4.05055e-08	-0.445903	0.120532	0.000216069	0.640246	1	1	1
cg06748884	0.0602762	0.718444	0.63839	0.808538	4.11446e-08	-0.196723	0.120452	0.102425	0.821419	1	0	0
cg09523601	0.0479874	0.768552	0.699562	0.844345	4.11692e-08	-0.0872802	0.126968	0.491819	0.91642	1	0	0
cg18959478	0.0512048	1.32418	1.19774	1.46397	4.16504e-08	0.0958778	0.120286	0.425403	1.10062	1	0	0
cg09276451	0.0670337	0.692407	0.607159	0.789624	4.16912e-08	-0.109077	0.122417	0.372914	0.896661	1	0	0
cg06704573	0.0593223	0.722434	0.643136	0.811509	4.23588e-08	-0.0497349	0.121445	0.682153	0.951482	1	0	0
cg09028651	0.0575854	0.729404	0.651556	0.816554	4.27035e-08	-0.0864643	0.120152	0.471756	0.917168	1	0	0
cg19194237	0.0622003	0.711227	0.629598	0.80344	4.28988e-08	-0.23049	0.120664	0.056111	0.794145	1	0	0
cg11820154	0.0559098	0.736275	0.659857	0.821544	4.35514e-08	-0.164169	0.123115	0.182383	0.848599	1	0	0
cg00393263	0.056119	0.735481	0.658875	0.820995	4.38463e-08	-0.317325	0.112573	0.00481963	0.728094	1	1	1
cg02319392	0.0739857	0.667113	0.577062	0.771216	4.468e-08	-0.187595	0.121659	0.123081	0.82895	1	0	0
cg26881527	0.0457478	1.28435	1.1742	1.40483	4.49534e-08	0.0985688	0.115572	0.393729	1.10359	1	0	0
cg06959251	0.0590906	0.72383	0.644672	0.812709	4.51216e-08	-0.298274	0.127885	0.0196812	0.742098	1	1	1
cg17464989	0.0558278	0.736958	0.660574	0.822173	4.57042e-08	-0.246825	0.109391	0.024048	0.781277	1	1	1
cg05237114	0.0500909	0.760442	0.689333	0.838888	4.57302e-08	-0.0518091	0.124618	0.677598	0.94951	1	0	0
cg19115941	0.0447267	1.27662	1.16947	1.39358	4.75615e-08	-0.0136647	0.123624	0.911985	0.986428	0	0	0
cg24777315	0.0533781	1.33827	1.20533	1.48586	4.79663e-08	0.0153119	0.132969	0.908323	1.01543	1	0	0
cg22731981	0.0632494	0.708218	0.625647	0.801688	4.90734e-08	-0.0365526	0.121369	0.763285	0.964107	1	0	0
cg23095243	0.0643151	0.704138	0.620744	0.798736	4.92234e-08	-0.325698	0.126925	0.0102857	0.722023	1	1	1
cg19919383	0.0534345	0.747219	0.672921	0.82972	4.94285e-08	-0.139203	0.11181	0.213132	0.870052	1	0	0
cg07557790	0.0505427	1.3171	1.19288	1.45425	5.05219e-08	-0.244997	0.145548	0.0923229	0.782707	0	0	0
cg08239297	0.0500013	0.761576	0.690481	0.839991	5.11801e-08	-0.22034	0.120075	0.0665039	0.802246	1	0	0
cg06770322	0.0562152	0.736233	0.659424	0.821988	5.12005e-08	-0.405366	0.107342	0.000159123	0.666733	1	1	1
cg11272705	0.0330775	1.19743	1.12226	1.27763	5.12242e-08	-0.135812	0.138961	0.328402	0.873007	0	0	0
cg20195812	0.0384967	1.23326	1.14363	1.32991	5.14584e-08	-0.432283	0.214818	0.0441858	0.649026	0	1	0
cg22008130	0.0534302	0.747565	0.673239	0.830097	5.17706e-08	-0.0570931	0.124552	0.646674	0.944506	1	0	0
cg25527494	0.0579879	1.37123	1.22392	1.53628	5.19713e-08	0.09178	0.137526	0.50454	1.09612	1	0	0
cg22108374	0.0681384	0.690179	0.603896	0.78879	5.27093e-08	-0.224423	0.136502	0.100154	0.798977	1	0	0
cg01058717	0.0603309	0.720272	0.639945	0.810682	5.36485e-08	0.044365	0.145031	0.759681	1.04536	0	0	0
cg08140609	0.059779	0.722485	0.642606	0.812293	5.39768e-08	-0.151353	0.123023	0.218591	0.859544	1	0	0
cg19916794	0.0636224	0.707735	0.624763	0.801727	5.52932e-08	-0.144126	0.131225	0.272068	0.865778	1	0	0
cg17717169	0.057756	0.730686	0.652482	0.818262	5.55024e-08	-0.242963	0.116969	0.0377871	0.784301	1	1	1
cg02515467	0.0614692	0.716251	0.634954	0.807956	5.66262e-08	-0.144309	0.120778	0.232155	0.865621	1	0	0
cg22464570	0.0474994	0.772717	0.704027	0.84811	5.68851e-08	-0.317032	0.100424	0.00159427	0.728307	1	1	1
cg25649784	0.0574188	0.732242	0.654304	0.819463	5.71283e-08	-0.0884869	0.126173	0.483109	0.915315	1	0	0
cg00215851	0.0562607	0.73691	0.659972	0.822818	5.75257e-08	-0.0272433	0.125508	0.828159	0.973124	1	0	0
cg25023600	0.0623401	0.713065	0.631052	0.805736	5.80161e-08	-0.120915	0.12417	0.330164	0.886109	1	0	0
cg10663897	0.0658775	0.699638	0.614892	0.796065	5.89153e-08	-0.238157	0.129964	0.0668789	0.788079	1	0	0
cg17231347	0.0547336	1.34535	1.2085	1.4977	5.96051e-08	0.07319	0.123926	0.554792	1.07593	1	0	0
cg08212913	0.121956	0.51638	0.406594	0.65581	5.98363e-08	-0.0882644	0.124366	0.47788	0.915519	1	0	0
cg16096766	0.0518533	0.755039	0.682075	0.835809	5.99831e-08	-0.144516	0.114467	0.206764	0.865441	1	0	0
cg00511464	0.0532307	0.749487	0.675234	0.831906	6.05084e-08	0.154203	0.150532	0.305652	1.16673	0	0	0
cg06587155	0.0572142	1.3632	1.2186	1.52497	6.11466e-08	0.222989	0.128048	0.0816056	1.24981	1	0	0
cg27082486	0.0429158	1.26161	1.15983	1.37232	6.12826e-08	-0.0892643	0.142061	0.529773	0.914604	0	0	0
cg25268863	0.0648973	0.703706	0.619656	0.799156	6.14147e-08	-0.287706	0.119102	0.0157081	0.749982	1	1	1
cg10526659	0.0537386	1.33758	1.20386	1.48614	6.21524e-08	0.0826883	0.12664	0.513796	1.0862	1	0	0
cg21221571	0.0622405	0.714165	0.632149	0.806822	6.34779e-08	-0.0882435	0.127509	0.4889	0.915538	1	0	0
cg22337605	0.0543701	1.34186	1.20622	1.49275	6.35827e-08	-0.118822	0.1478	0.421434	0.887966	0	0	0
cg00020622	0.051164	1.31848	1.19267	1.45755	6.52709e-08	0.0126043	0.131029	0.923366	1.01268	1	0	0
cg17315844	0.0669069	0.696606	0.610992	0.794215	6.53272e-08	-0.219547	0.127549	0.0852015	0.802883	1	0	0
cg22626169	0.0640123	0.707597	0.624163	0.802182	6.5407e-08	-0.158716	0.125987	0.207749	0.853239	1	0	0
cg14270346	0.0693298	0.687786	0.600399	0.787893	6.71997e-08	-0.378142	0.127176	0.00294544	0.685133	1	1	1
cg14503180	0.0366937	1.21899	1.1344	1.30988	6.79313e-08	-0.220286	0.149605	0.140898	0.802289	0	0	0
cg25338262	0.0551601	1.34662	1.20863	1.50037	6.84452e-08	0.00989577	0.125208	0.937005	1.00994	1	0	0
cg03769908	0.0566434	0.736722	0.659309	0.823225	6.88411e-08	-0.0459599	0.117969	0.696837	0.95508	1	0	0
cg07416656	0.0610618	1.38995	1.23317	1.56666	6.95311e-08	0.126334	0.130017	0.331214	1.13466	1	0	0
cg26475541	0.0610779	0.719398	0.638234	0.810885	6.96282e-08	-0.00780255	0.126964	0.950997	0.992228	1	0	0
cg27615067	0.0500367	0.763545	0.692218	0.84222	6.97873e-08	-0.162303	0.112134	0.147785	0.850184	1	0	0
cg03360728	0.0644997	0.706452	0.622559	0.801651	7.13991e-08	0.0337568	0.117905	0.774644	1.03433	0	0	0
cg06677321	0.0713103	0.68108	0.592241	0.783245	7.20521e-08	-0.143751	0.137338	0.295238	0.866103	1	0	0
cg13655563	0.0561397	1.35271	1.21176	1.51005	7.39294e-08	-0.0583525	0.13961	0.675971	0.943317	0	0	0
cg13413384	0.0572237	0.735019	0.657037	0.822257	7.45166e-08	-0.099291	0.120118	0.408455	0.905479	1	0	0
cg25124402	0.0637744	0.709638	0.626256	0.804121	7.51716e-08	-0.280615	0.135176	0.0379008	0.755319	1	1	1
cg22117062	0.0476196	0.774165	0.70518	0.8499	7.64549e-08	-0.370213	0.123866	0.0028005	0.690587	1	1	1
cg25972943	0.0565552	0.737898	0.660475	0.824396	7.68382e-08	0.0898137	0.119268	0.451424	1.09397	0	0	0
cg18645002	0.0515289	0.758136	0.685308	0.838704	7.72079e-08	-0.198595	0.128467	0.122133	0.819882	1	0	0
cg22357379	0.0580875	0.731887	0.65313	0.82014	7.72504e-08	0.0921412	0.131627	0.483917	1.09652	0	0	0
cg10023915	0.0552927	0.743008	0.666697	0.828055	7.7746e-08	-0.105489	0.121755	0.386272	0.899885	1	0	0
cg23609905	0.0328527	1.193	1.11861	1.27235	7.80251e-08	-0.285833	0.163366	0.0801794	0.751388	0	0	0
cg09155701	0.0417359	1.25127	1.15299	1.35793	7.83596e-08	-0.263882	0.166417	0.112814	0.768064	0	0	0
cg03171659	0.0602195	0.723853	0.643267	0.814534	8.02883e-08	-0.17865	0.115857	0.123075	0.836399	1	0	0
cg26569315	0.0667221	0.699114	0.613414	0.796786	8.10964e-08	-0.241006	0.112619	0.0323545	0.785837	1	1	1
cg19425513	0.0764436	0.663609	0.571272	0.770869	8.12834e-08	0.0938805	0.121605	0.440107	1.09843	0	0	0
cg15831228	0.0538588	0.749216	0.674159	0.832629	8.28364e-08	-0.150214	0.12432	0.226941	0.860524	1	0	0
cg26315457	0.0644719	0.707877	0.623849	0.803224	8.38322e-08	-0.0774518	0.122872	0.528468	0.925472	1	0	0
cg26796443	0.0626299	0.714907	0.632323	0.808277	8.39132e-08	-0.310235	0.129778	0.016825	0.733275	1	1	1
cg12656291	0.0625326	1.39803	1.23677	1.58032	8.40346e-08	0.238795	0.122827	0.0518762	1.26972	1	0	0
cg19860160	0.0506964	0.762132	0.690044	0.841749	8.41043e-08	-0.244485	0.112373	0.0295805	0.783108	1	1	1
cg26246947	0.069061	0.690741	0.603296	0.79086	8.44053e-08	-0.106476	0.126795	0.40105	0.898997	1	0	0
cg06392698	0.0578874	0.733405	0.654742	0.821519	8.49884e-08	-0.375575	0.121794	0.00204452	0.686894	1	1	1
cg14020176	0.0590023	0.729075	0.649455	0.818455	8.53815e-08	-0.167277	0.113401	0.140187	0.845965	1	0	0
cg05149195	0.0565508	0.738776	0.661266	0.82537	8.61333e-08	-0.155702	0.118883	0.190294	0.855814	1	0	0
cg19096849	0.0589279	0.729453	0.649887	0.818761	8.63551e-08	-0.0114212	0.118697	0.923345	0.988644	1	0	0
cg13596833	0.0632531	1.40289	1.23931	1.58805	8.69843e-08	0.21788	0.139899	0.119374	1.24344	1	0	0
cg20208990	0.0632106	0.712993	0.629913	0.807031	8.71406e-08	-0.137503	0.120899	0.255398	0.871532	1	0	0
cg24505073	0.0588843	0.72975	0.650207	0.819024	8.77739e-08	-0.084021	0.118168	0.477065	0.919412	1	0	0
cg04697635	0.0473746	0.776124	0.707304	0.851641	8.8072e-08	-0.312524	0.102827	0.0023711	0.731598	1	1	1
cg13936452	0.0639396	1.40772	1.24191	1.59567	8.87572e-08	0.0392568	0.130184	0.762996	1.04004	1	0	0
cg16970357	0.063641	1.40542	1.24061	1.59213	8.90357e-08	0.149191	0.139805	0.28591	1.1609	1	0	0
cg05847784	0.0499018	1.30584	1.18417	1.44001	8.92264e-08	0.0361634	0.127324	0.776391	1.03683	1	0	0
cg08778316	0.0626576	0.715472	0.632788	0.80896	9.11508e-08	-0.149307	0.125924	0.235746	0.861305	1	0	0
cg06402816	0.0521514	1.32103	1.19268	1.4632	9.36815e-08	0.0567499	0.13307	0.669767	1.05839	1	0	0
cg24702341	0.0789532	0.656099	0.562036	0.765904	9.4034e-08	-0.15957	0.124273	0.199134	0.852511	1	0	0
cg21641186	0.0609618	0.722274	0.640931	0.813941	9.4518e-08	-0.417778	0.105313	7.27767e-05	0.658509	1	1	1
cg17242608	0.0641892	1.40821	1.24174	1.597	9.66242e-08	0.170216	0.128437	0.185073	1.18556	1	0	0
cg25607643	0.0661746	0.702882	0.617383	0.800222	9.94011e-08	-0.287032	0.119557	0.0163596	0.750487	1	1	1
cg15379185	0.0599624	1.37636	1.22375	1.548	9.9643e-08	-0.0696948	0.134072	0.603181	0.932678	0	0	0

## Sheet: Table S3c
Table S3c. EWAS subgroup analyses (N=615 ER-negative cases), age-adjusted model, and replication results in GSE141441 (N=165 triple-negative tumours)
CpG	All cases; age-adjusted model (N cases = 615; N deaths = 149)					GSE141441 (N cases = 165; N events = 69)				Replication
	SD	HR	Inf95CI	Sup95CI	P	Coef	SE	P	HR	Same direction (yes=1; no=0)	P<0.05 (yes=1; no=0)	Replicated (yes=1; no=0)
cg01074413	0.103956	0.541577	0.441746	0.663969	3.64996e-09	-0.0876419	0.122864	0.475646	0.916089	1	0	0
cg01815090	0.0772637	0.651843	0.560242	0.75842	3.04466e-08	-0.213782	0.119713	0.0741331	0.807525	1	0	0
cg01945840	0.0571693	0.720054	0.643728	0.80543	9.20022e-09	-0.247399	0.107865	0.0218136	0.780829	1	1	1
cg02628801	0.0582223	1.38795	1.23827	1.55572	1.7958e-08	-0.356993	0.198935	0.0727299	0.699778	0	0	0
cg03025825	0.0996692	0.587265	0.483054	0.713958	9.27094e-08	-0.0254752	0.120957	0.833189	0.974847	1	0	0
cg03269020	0.0761746	0.650929	0.560652	0.755742	1.73579e-08	-0.0598759	0.108872	0.582344	0.941881	1	0	0
cg03625953	0.10346	0.566388	0.462433	0.693712	3.91499e-08	-0.0628315	0.12304	0.609588	0.939102	1	0	0
cg04164415	0.0713768	1.47181	1.27966	1.69281	6.13486e-08	-0.145441	0.143977	0.312414	0.864641	0	0	0
cg05053688	0.0588814	1.37356	1.22385	1.54159	7.02016e-08	-0.023697	0.120865	0.844562	0.976582	0	0	0
cg09869811	0.0663804	0.692298	0.607841	0.78849	3.02684e-08	-0.420615	0.099728	2.46894e-05	0.656643	1	1	1
cg11065036	0.0784753	0.652367	0.559363	0.760835	5.2366e-08	-0.1816	0.122639	0.13867	0.833935	1	0	0
cg11113931	0.083636	0.627549	0.532668	0.739331	2.53326e-08	-0.355202	0.128317	0.00563733	0.701031	1	1	1
cg13965612	0.0791339	0.649673	0.556334	0.758671	5.0346e-08	-0.123495	0.13294	0.352915	0.883826	1	0	0
cg15161225	0.0686585	0.677694	0.592368	0.775311	1.45669e-08	-0.194049	0.107069	0.0699293	0.823617	1	0	0
cg15745944	0.0708553	0.680568	0.592324	0.781958	5.59839e-08	-0.189593	0.1458	0.193475	0.827295	1	0	0
cg17826986	0.0709229	1.46332	1.27341	1.68154	7.96626e-08	0.0981615	0.116615	0.399922	1.10314	1	0	0
cg21799206	0.0603535	1.42541	1.26639	1.60441	4.27693e-09	-0.138186	0.149163	0.354234	0.870937	0	0	0
cg23782866	0.083337	0.638369	0.54217	0.751637	7.21097e-08	-0.0646741	0.118212	0.584307	0.937373	1	0	0
cg24777065	0.0607754	1.39218	1.23584	1.56829	5.20671e-08	-0.243868	0.152568	0.109949	0.783591	0	0	0
cg26822986	0.071912	1.49215	1.29598	1.718	2.61635e-08	-0.00672407	0.121308	0.955796	0.993298	0	0	0

## Sheet: Table S3d
Table S3d. EWAS subgroup analyses (N=1,377 ER-positive cases), age-adjusted model, and replication results in GSE141441 (N=165 triple-negative tumours)
CpG	All cases; age-adjusted model (N cases = 1,377; N deaths = 123)					GSE141441 (N cases = 165; N events = 69)				Replication
	SD	HR	Inf95CI	Sup95CI	P	Coef	SE	P	HR	Same direction (yes=1; no=0)	P<0.05 (yes=1; no=0)	Replicated (yes=1; no=0)
cg04436083	0.0527148	0.67062	0.604791	0.743614	3.47e-14	-0.0692108	0.112623	0.538862	0.93313	1	0	0
cg08024409	0.040968	1.35834	1.25353	1.4719	7.68e-14	0.0275208	0.127528	0.829142	1.0279	1	0	0
cg26065841	0.0678948	0.612912	0.536545	0.700149	5.59e-13	-0.0621539	0.115169	0.58942	0.939738	1	0	0
cg10626556	0.0719186	0.596002	0.517643	0.686222	6.21e-13	-0.184122	0.125997	0.143928	0.831834	1	0	0
cg12735333	0.0701222	0.60507	0.527372	0.694214	7.79e-13	0.00726339	0.143806	0.959717	1.00729	0	0	0
cg13636404	0.0412114	1.34295	1.23875	1.45593	8.36e-13	0.0552142	0.13081	0.672957	1.05677	1	0	0
cg16461335	0.0691843	0.609638	0.532332	0.698171	8.48e-13	0.0116609	0.126135	0.926342	1.01173	0	0	0
cg02129127	0.0537549	0.686999	0.618301	0.76333	2.87e-12	-0.137184	0.130053	0.291503	0.87181	1	0	0
cg24079830	0.0634317	0.643457	0.568233	0.728639	3.63e-12	-0.255697	0.115521	0.0268689	0.774377	1	1	1
cg23402524	0.0592094	0.665037	0.592171	0.74687	5.61e-12	-0.258094	0.121016	0.0329467	0.772522	1	1	1
cg15755348	0.0682311	0.625696	0.547375	0.715223	6.33e-12	-0.0500326	0.12751	0.694777	0.951198	1	0	0
cg07484673	0.0387727	1.30201	1.20673	1.40481	1e-11	0.0655174	0.131392	0.618034	1.06771	1	0	0
cg00936699	0.0593688	0.668898	0.595423	0.751441	1.26e-11	-0.17168	0.132889	0.196392	0.842249	1	0	0
cg01079658	0.0457593	1.36281	1.2459	1.49068	1.34e-11	0.103966	0.127684	0.415503	1.10956	1	0	0
cg24328142	0.0837363	0.568009	0.482035	0.669317	1.43e-11	-0.131891	0.122537	0.281776	0.876437	1	0	0
cg16514255	0.0716602	0.617034	0.536182	0.710079	1.61e-11	-0.00255759	0.117547	0.982641	0.997446	1	0	0
cg09866695	0.075449	0.603577	0.520608	0.69977	2.21e-11	-0.225249	0.121923	0.0646786	0.798318	1	0	0
cg05508862	0.0758686	0.601944	0.518772	0.69845	2.23e-11	-0.0402218	0.127329	0.752087	0.960576	1	0	0
cg03764364	0.0795091	0.58831	0.503417	0.687519	2.52e-11	0.279778	0.14209	0.0489509	1.32284	0	1	0
cg15211864	0.0768661	0.663899	0.588568	0.748872	2.63e-11	-0.107183	0.112299	0.339862	0.898362	1	0	0
cg00138126	0.0614491	0.599058	0.515276	0.696462	2.63e-11	-0.0164307	0.122996	0.893729	0.983704	1	0	0
cg13052887	0.0665279	0.642101	0.563605	0.73153	2.76e-11	0.0141283	0.135089	0.916705	1.01423	0	0	0
cg14076360	0.0472285	0.731285	0.666631	0.802209	3.44e-11	-0.166175	0.115292	0.14949	0.846898	1	0	0
cg07890954	0.0567632	0.686677	0.614378	0.767484	3.54e-11	-0.25341	0.117007	0.0303288	0.776149	1	1	1
cg20444370	0.0729501	0.61818	0.535821	0.713198	4.3e-11	-0.0589818	0.129922	0.649846	0.942724	1	0	0
cg27368333	0.0837614	0.575837	0.488654	0.678574	4.42e-11	-0.088083	0.121725	0.469296	0.915685	1	0	0
cg15688070	0.0762424	0.607038	0.522779	0.704877	5.87e-11	-0.28921	0.134198	0.0311546	0.748855	1	1	1
cg06909503	0.0669434	0.645641	0.566251	0.736162	6.34e-11	-0.132085	0.118392	0.264568	0.876267	1	0	0
cg12457529	0.0369284	1.27198	1.18317	1.36746	7.29e-11	0.0570934	0.12946	0.659203	1.05875	1	0	0
cg09226275	0.0736203	0.619431	0.536201	0.715581	7.73e-11	-0.130211	0.126873	0.304746	0.877911	1	0	0
cg04697635	0.0492905	0.726113	0.659247	0.799761	8.41e-11	-0.312524	0.102827	0.0023711	0.731598	1	1	1
cg09871057	0.0724335	0.624965	0.542251	0.720296	8.61e-11	0.0140123	0.127475	0.912471	1.01411	0	0	0
cg03879320	0.0649578	0.657139	0.578582	0.746361	1.02e-10	-0.0268723	0.130226	0.836516	0.973486	1	0	0
cg04316126	0.0496694	0.726563	0.659166	0.800852	1.27e-10	0.0227442	0.132699	0.863912	1.023	0	0	0
cg02744945	0.0915536	0.555113	0.463928	0.66422	1.29e-10	-0.150484	0.124607	0.227175	0.860291	1	0	0
cg06104859	0.0712349	0.63391	0.551305	0.728891	1.56e-10	-0.104511	0.119543	0.381981	0.900765	1	0	0
cg07235253	0.0413178	1.30207	1.20078	1.4119	1.68e-10	0.0626673	0.124272	0.614067	1.06467	1	0	0
cg14338114	0.0467208	0.742254	0.677304	0.813432	1.77e-10	0.0970538	0.137847	0.48139	1.10192	0	0	0
cg03175417	0.0751535	0.619381	0.534548	0.717676	1.84e-10	-0.453591	0.116097	9.34e-05	0.635342	1	1	1
cg21336288	0.0576785	0.692439	0.618423	0.775314	1.86e-10	-0.308847	0.11874	0.00929409	0.734293	1	1	1
cg27070397	0.0727761	0.6297	0.545992	0.726241	2.08e-10	-0.119793	0.12081	0.321401	0.887104	1	0	0
cg13811168	0.0737384	0.625953	0.541721	0.723282	2.11e-10	-0.229217	0.117403	0.0508911	0.795156	1	0	0
cg18128976	0.0709425	0.637632	0.554861	0.732752	2.25e-10	-0.289262	0.116197	0.0127956	0.748816	1	1	1
cg02960777	0.0737831	0.626403	0.542063	0.723866	2.3e-10	-0.281334	0.119476	0.0185363	0.754776	1	1	1
cg18558767	0.0835835	0.58869	0.499736	0.693479	2.31e-10	-0.105155	0.125865	0.40346	0.900185	1	0	0
cg00393263	0.0651948	0.662563	0.583087	0.752872	2.72e-10	-0.317325	0.112573	0.00481963	0.728094	1	1	1
cg05541542	0.0708479	0.641882	0.558662	0.737498	3.9e-10	-0.149175	0.113925	0.190395	0.861419	1	0	0
cg25268863	0.0678764	0.654534	0.573001	0.747668	4.26e-10	-0.287706	0.119102	0.0157081	0.749982	1	1	1
cg17712416	0.056581	0.702532	0.628788	0.784925	4.38e-10	-0.367674	0.112261	0.00105599	0.692343	1	1	1
cg25278786	0.0488192	0.737486	0.670191	0.811538	4.45e-10	-0.0927623	0.135274	0.492879	0.91141	1	0	0
cg23930313	0.0812113	1.65895	1.41484	1.94518	4.58e-10	0.162419	0.127475	0.202619	1.17635	1	0	0
cg03593189	0.0750798	0.626668	0.540916	0.726015	4.83e-10	0.000918892	0.123017	0.99404	1.00092	0	0	0
cg05946353	0.0734352	0.633863	0.548892	0.731987	5.35e-10	-0.394863	0.137795	0.00416254	0.673772	1	1	1
cg07373212	0.0563289	0.704934	0.631249	0.787219	5.39e-10	-0.162796	0.110108	0.13927	0.849764	1	0	0
cg03297731	0.085768	0.588047	0.497057	0.695693	6e-10	0.0051815	0.131035	0.968458	1.00519	0	0	0
cg02057755	0.0852749	0.590076	0.499254	0.697419	6.17e-10	-0.191985	0.133459	0.150285	0.82532	1	0	0
cg07233933	0.0692613	0.651792	0.569054	0.746559	6.41e-10	-0.0136351	0.131969	0.917708	0.986457	1	0	0
cg18471029	0.0564411	0.705609	0.631715	0.788146	6.49e-10	0.0720684	0.145255	0.619788	1.07473	0	0	0
cg12569119	0.0762099	0.624599	0.537937	0.725223	6.59e-10	-0.0213605	0.131691	0.871147	0.978866	1	0	0
cg16970357	0.0750233	1.58858	1.37136	1.84022	6.86e-10	0.149191	0.139805	0.28591	1.1609	1	0	0
cg03575373	0.0750121	0.630147	0.54399	0.729948	7.44e-10	-0.245425	0.126952	0.053211	0.782372	1	0	0
cg06402816	0.06845	1.52317	1.33194	1.74186	7.87e-10	0.0567499	0.13307	0.669767	1.05839	1	0	0
cg14424538	0.0904926	1.7431	1.45981	2.08138	8.23e-10	0.0357529	0.129957	0.783229	1.0364	1	0	0
cg13479215	0.0749232	0.631379	0.545149	0.731248	8.38e-10	-0.0867011	0.116498	0.456738	0.916951	1	0	0
cg22092126	0.0654472	0.671032	0.590248	0.762872	1.09e-09	-0.0580326	0.110469	0.599354	0.943619	1	0	0
cg20208990	0.0780021	0.621794	0.533643	0.724506	1.12e-09	-0.137503	0.120899	0.255398	0.871532	1	0	0
cg26065318	0.056104	0.711536	0.637443	0.794242	1.31e-09	-0.253395	0.128092	0.0479035	0.776161	1	1	1
cg19823504	0.0701507	0.653738	0.569759	0.750094	1.37e-09	-0.275914	0.12591	0.0284255	0.758878	1	1	1
cg24746938	0.0744868	0.647284	0.562258	0.745168	1.41e-09	-0.274148	0.121515	0.0240658	0.76022	1	1	1
cg15453708	0.0718505	0.636986	0.550461	0.737112	1.41e-09	-0.23975	0.122758	0.0508155	0.786824	1	0	0
cg07362328	0.0859711	1.68022	1.41967	1.98858	1.58e-09	0.0333457	0.133219	0.80235	1.03391	1	0	0
cg21660861	0.067008	0.667489	0.585338	0.76117	1.61e-09	-0.225385	0.125168	0.0717561	0.798209	1	0	0
cg09729274	0.0838344	0.603567	0.512113	0.711354	1.72e-09	-0.185267	0.121367	0.126885	0.830883	1	0	0
cg04832466	0.0668139	1.49399	1.31062	1.70302	1.87e-09	0.00104934	0.124782	0.99329	1.00105	1	0	0
cg26768556	0.0704621	0.654954	0.570471	0.751949	1.9e-09	-0.308485	0.123284	0.0123415	0.734559	1	1	1
cg05976283	0.0672621	0.66804	0.58553	0.762177	2e-09	-0.183674	0.128454	0.15275	0.832207	1	0	0
cg07946977	0.0789893	0.623087	0.533719	0.727418	2.11e-09	0.395393	0.134231	0.00322316	1.48497	0	1	0
cg05957544	0.0860403	0.59742	0.50471	0.70716	2.14e-09	-0.195573	0.117847	0.097005	0.822363	1	0	0
cg09976893	0.0729175	0.646326	0.560253	0.745623	2.16e-09	-0.256162	0.121389	0.0348359	0.774017	1	1	1
cg07143805	0.0857128	0.59929	0.506615	0.708918	2.32e-09	0.0137741	0.125342	0.912494	1.01387	0	0	0
cg14919455	0.0660111	0.674174	0.592357	0.767292	2.33e-09	-0.254828	0.124347	0.0404309	0.77505	1	1	1
cg25213452	0.0718611	0.651265	0.565704	0.749767	2.41e-09	-0.095028	0.124594	0.445643	0.909348	1	0	0
cg17094014	0.039037	1.26222	1.16925	1.36258	2.44e-09	-0.270753	0.182958	0.13891	0.762805	0	0	0
cg02704907	0.0684991	0.664683	0.581176	0.760188	2.48e-09	-0.0973042	0.115824	0.400851	0.90728	0	0	0
cg13144143	0.055948	0.71653	0.642113	0.799572	2.55e-09	-0.158159	0.111741	0.15695	0.853714	1	0	0
cg18407963	0.0627557	0.689304	0.609528	0.779523	3.05e-09	0.27796	0.156387	0.0755052	1.32043	0	0	0
cg19061112	0.0872039	0.596607	0.502875	0.70781	3.16e-09	0.254239	0.13403	0.0578445	1.28948	0	0	0
cg19098465	0.0609291	0.697109	0.61864	0.785532	3.18e-09	-0.244264	0.122837	0.0467542	0.783281	1	1	1
cg16062877	0.0868097	0.598394	0.504771	0.709381	3.31e-09	-0.00205015	0.126069	0.987025	0.997952	1	0	0
cg04878240	0.0698004	0.661999	0.577355	0.759052	3.43e-09	-0.123633	0.116957	0.290475	0.883704	1	0	0
cg09669874	0.0700861	0.661055	0.576209	0.758394	3.51e-09	0.0963075	0.137863	0.484818	1.1011	0	0	0
cg22168987	0.0859981	0.602036	0.508652	0.712565	3.62e-09	-0.127015	0.116763	0.276685	0.880721	1	0	0
cg13587908	0.0981631	0.560717	0.462581	0.679674	3.78e-09	0.133542	0.137979	0.333121	1.14287	0	0	0
cg18583276	0.0450237	0.766998	0.702215	0.837757	3.82e-09	-0.0648158	0.125404	0.605258	0.93724	1	0	0
cg03515844	0.0855589	0.604171	0.510895	0.714476	3.87e-09	0.0948848	0.136251	0.486181	1.09953	0	0	0
cg03462699	0.0691981	1.50308	1.31244	1.72141	3.88e-09	-0.0394265	0.144609	0.785129	0.961341	0	0	0
cg03805492	0.0783908	1.58667	1.36069	1.85017	3.89e-09	0.302413	0.114598	0.00831741	1.35312	1	1	1
cg11273176	0.0735565	0.648471	0.561409	0.749035	3.9e-09	-0.310373	0.118856	0.00901896	0.733173	1	1	1
cg03163545	0.0772202	0.635096	0.545896	0.738872	4.13e-09	-0.296961	0.130036	0.0223905	0.743073	1	1	1
cg04588969	0.0857946	0.603945	0.510468	0.714539	4.16e-09	-0.0386881	0.114321	0.73505	0.962051	1	0	0
cg03281139	0.10732	0.53228	0.43131	0.656887	4.21e-09	-0.414624	0.145912	0.00448876	0.660589	1	1	1
cg14196998	0.0839413	0.61089	0.518217	0.720135	4.33e-09	0.0586202	0.124188	0.636907	1.06037	0	0	0
cg07949217	0.0969527	0.565998	0.468046	0.684449	4.34e-09	-0.0947895	0.126699	0.454371	0.909564	1	0	0
cg09056181	0.0732732	1.5371	1.33147	1.77448	4.44e-09	-0.0049573	0.124672	0.968282	0.995055	0	0	0
cg15168816	0.0673566	1.48463	1.30102	1.69416	4.44e-09	-0.18612	0.134567	0.166633	0.830174	0	0	0
cg00436420	0.0690296	0.667131	0.582711	0.763782	4.53e-09	0.0479301	0.136566	0.725613	1.0491	0	0	0
cg05935075	0.0738554	0.648545	0.561144	0.749559	4.54e-09	-0.305815	0.122773	0.0127421	0.736523	1	1	1
cg23106115	0.0876975	0.598229	0.503755	0.710421	4.67e-09	-0.239011	0.124894	0.0556564	0.787406	1	0	0
cg24140528	0.0805896	0.624009	0.532835	0.730784	4.86e-09	-0.0847604	0.125916	0.500853	0.918732	1	0	0
cg03147210	0.0333113	1.21507	1.13827	1.29705	4.98e-09	-0.282622	0.219629	0.198158	0.753804	0	0	0
cg07790170	0.0738019	1.53893	1.33168	1.77844	5.18e-09	0.268317	0.117429	0.0223172	1.30776	1	1	1
cg22338356	0.0748095	0.646174	0.558048	0.748217	5.31e-09	-0.0545902	0.12612	0.665127	0.946873	1	0	0
cg02650317	0.0773348	1.57045	1.34957	1.82748	5.33e-09	0.0774639	0.126581	0.540556	1.08054	1	0	0
cg16312163	0.0546188	1.37476	1.23519	1.53009	5.63e-09	-0.239792	0.149067	0.1077	0.786791	0	0	0
cg17800124	0.0638827	0.689218	0.608106	0.781149	5.67e-09	-0.415196	0.111257	0.000190063	0.660211	1	1	1
cg13895235	0.0694756	1.49811	1.30739	1.71665	5.96e-09	0.133019	0.126496	0.292997	1.14227	1	0	0
cg11150074	0.0693987	0.667881	0.582944	0.765194	6.02e-09	-0.252548	0.118152	0.0325581	0.776819	1	1	1
cg00665106	0.0763851	0.641389	0.552208	0.744973	6.09e-09	-0.0709542	0.128711	0.581449	0.931505	1	0	0
cg01858089	0.0530499	0.734617	0.662071	0.815111	6.12e-09	0.0218188	0.146155	0.881329	1.02206	0	0	0
cg20686479	0.0465597	1.31073	1.19641	1.43597	6.19e-09	-0.320578	0.150082	0.0326783	0.72573	0	1	0
cg20297053	0.0759777	0.643123	0.554142	0.74639	6.25e-09	-0.106354	0.129319	0.410842	0.899106	1	0	0
cg17641904	0.0769822	1.56397	1.34493	1.81868	6.27e-09	-0.038948	0.138313	0.778256	0.961801	0	0	0
cg14839501	0.0991888	0.562093	0.462784	0.682713	6.32e-09	-0.419782	0.149531	0.0049955	0.65719	1	1	1
cg11431957	0.06159	1.42952	1.26697	1.61293	6.56e-09	0.117858	0.122998	0.337957	1.12508	1	0	0
cg00501904	0.0782166	0.635365	0.545061	0.740631	6.68e-09	-0.106956	0.136076	0.431866	0.898565	1	0	0
cg17693757	0.0742601	0.650182	0.562114	0.752047	6.74e-09	-0.197963	0.122516	0.106133	0.8204	1	0	0
cg13281139	0.0852095	1.63828	1.3863	1.93606	6.9e-09	-0.0332326	0.136502	0.80765	0.967314	0	0	0
cg16179607	0.0579877	0.714735	0.637949	0.800764	6.97e-09	-0.0556402	0.133558	0.676971	0.945879	1	0	0
cg01569875	0.0907792	0.59113	0.494779	0.706243	6.99e-09	-0.105211	0.112909	0.351425	0.900134	1	0	0
cg03910767	0.0691657	1.49175	1.30264	1.70833	7.36e-09	0.0146916	0.128801	0.909187	1.0148	1	0	0
cg07456681	0.0860263	0.608274	0.513894	0.719987	7.52e-09	-0.155565	0.119917	0.194537	0.855932	1	0	0
cg19138865	0.0796707	0.631052	0.53982	0.737702	7.54e-09	-0.230328	0.125241	0.0659036	0.794273	1	0	0
cg00511464	0.0669404	0.680126	0.596499	0.775477	8.49e-09	0.154203	0.150532	0.305652	1.16673	0	0	0
cg02610600	0.078997	0.634911	0.54384	0.741234	8.9e-09	0.0183047	0.127204	0.88558	1.01847	0	0	0
cg10164592	0.0805196	1.58815	1.35629	1.85964	9.2e-09	-0.15436	0.1277	0.226752	0.856963	0	0	0
cg00895174	0.097529	0.571262	0.471866	0.691596	9.42e-09	-0.281262	0.110927	0.0112267	0.75483	1	1	1
cg07854457	0.0996803	0.56444	0.464269	0.686224	9.61e-09	-0.0622498	0.126301	0.622104	0.939648	1	0	0
cg15975676	0.0486238	0.756694	0.68791	0.832356	9.82e-09	-0.0935157	0.13287	0.481548	0.910724	1	0	0
cg19640779	0.0728224	0.658794	0.571167	0.759864	9.98e-09	-0.338357	0.111538	0.00241689	0.712941	1	1	1
cg20299802	0.0815109	0.650196	0.56116	0.753359	1.01e-08	-0.231262	0.122799	0.0596652	0.793531	1	0	0
cg15403900	0.0751381	0.626853	0.534298	0.735442	1.01e-08	-0.263845	0.142276	0.0636747	0.768093	1	0	0
cg20232503	0.0723692	0.660717	0.573343	0.761405	1.02e-08	-0.329878	0.122421	0.00704711	0.719011	1	1	1
cg27077673	0.0713113	0.664873	0.578147	0.764609	1.04e-08	-0.0961555	0.121963	0.430465	0.908323	1	0	0
cg26781464	0.0751313	0.650582	0.5615	0.753796	1.05e-08	-0.0447042	0.132783	0.736364	0.95628	1	0	0
cg12037593	0.0718212	0.663042	0.575979	0.763265	1.06e-08	-0.186462	0.123679	0.131651	0.82989	1	0	0
cg26757793	0.0826931	0.623187	0.529944	0.732836	1.07e-08	-0.0656474	0.142543	0.645126	0.936461	1	0	0
cg07594833	0.066815	0.682442	0.598677	0.777927	1.08e-08	-0.323592	0.102871	0.00165741	0.723545	1	1	1
cg22027204	0.0814595	0.627695	0.53507	0.736355	1.08e-08	-0.321808	0.124641	0.0098267	0.724837	1	1	1
cg03015790	0.0825395	1.56518	1.34232	1.82505	1.09e-08	0.166	0.123809	0.179996	1.18057	1	0	0
cg19118904	0.0783716	0.675078	0.589987	0.772441	1.09e-08	-0.06026	0.122781	0.623573	0.94152	1	0	0
cg11940177	0.0687399	0.62386	0.530676	0.733407	1.09e-08	-0.0200082	0.126736	0.874557	0.980191	1	0	0
cg02148800	0.0609264	0.705972	0.626508	0.795515	1.1e-08	-0.182629	0.117942	0.121511	0.833077	1	0	0
cg01704534	0.0931296	0.587438	0.48943	0.705073	1.11e-08	0.00799593	0.136102	0.953152	1.00803	0	0	0
cg17329004	0.058765	0.714879	0.637106	0.802145	1.12e-08	0.0642558	0.133485	0.630252	1.06637	0	0	0
cg08370839	0.0628356	0.698561	0.617616	0.790115	1.14e-08	-0.113547	0.133213	0.394009	0.892663	1	0	0
cg05437648	0.036093	0.672978	0.587369	0.771065	1.16e-08	-0.391961	0.120838	0.00117993	0.67573	1	1	1
cg07121182	0.0694193	1.22866	1.14475	1.31873	1.16e-08	0.00898189	0.128826	0.944415	1.00902	1	0	0
cg08998657	0.0767316	0.645546	0.55541	0.750311	1.17e-08	-0.418791	0.132515	0.00157591	0.657842	1	1	1
cg24872571	0.0642799	0.693067	0.611027	0.786123	1.17e-08	-0.213429	0.121871	0.0799009	0.80781	1	0	0
cg25525379	0.0705106	0.668887	0.582551	0.768019	1.18e-08	-0.135422	0.126896	0.285886	0.873347	1	0	0
cg11601027	0.0658167	1.45522	1.27911	1.65559	1.2e-08	0.1944	0.119212	0.102953	1.21458	1	0	0
cg06907418	0.0704716	1.49419	1.30143	1.71551	1.21e-08	0.20516	0.124762	0.100091	1.22772	1	0	0
cg05309505	0.076996	0.644878	0.554547	0.749923	1.21e-08	0.0280594	0.131932	0.831576	1.02846	0	0	0
cg00563858	0.0594665	0.712731	0.634319	0.800836	1.23e-08	-0.260327	0.115147	0.0237705	0.770799	1	1	1
cg07162700	0.0761169	0.648307	0.558457	0.752613	1.24e-08	-0.0660943	0.134008	0.621863	0.936043	1	0	0
cg20167126	0.0566129	1.41686	1.25669	1.59743	1.25e-08	-0.244896	0.139666	0.0795261	0.782786	0	0	0
cg10373196	0.061204	1.38032	1.23535	1.5423	1.25e-08	-0.10667	0.147414	0.469306	0.898822	0	0	0
cg03748476	0.0773501	0.643948	0.553363	0.749361	1.27e-08	-0.0342281	0.134691	0.799401	0.966351	1	0	0
cg00043788	0.0901875	1.67055	1.39988	1.99355	1.27e-08	-0.0999934	0.13092	0.445	0.904843	0	0	0
cg13800802	0.071144	0.66719	0.580353	0.767022	1.28e-08	-0.387118	0.122591	0.00158965	0.679011	1	1	1
cg00843117	0.0508244	0.749057	0.678036	0.827516	1.31e-08	-0.00233482	0.13358	0.986055	0.997668	1	0	0
cg26073856	0.0522417	0.658345	0.569901	0.760515	1.35e-08	-0.233126	0.13033	0.0736578	0.792054	1	0	0
cg20452212	0.0736069	1.34543	1.21449	1.49049	1.35e-08	0.058044	0.13062	0.656773	1.05976	1	0	0
cg02503824	0.0812248	1.58529	1.35198	1.85886	1.41e-08	0.120104	0.118469	0.310678	1.12761	1	0	0
cg21285564	0.0719267	0.665512	0.578005	0.766267	1.5e-08	-0.161059	0.135463	0.234456	0.851242	1	0	0
cg04767841	0.080364	0.634534	0.542062	0.742781	1.51e-08	0.179091	0.135638	0.186713	1.19613	0	0	0
cg18876084	0.0529876	0.666057	0.578609	0.766723	1.52e-08	-0.295319	0.114131	0.00966625	0.744294	1	1	1
cg14421371	0.0718125	0.74092	0.667833	0.822005	1.52e-08	0.00340148	0.128087	0.978814	1.00341	0	0	0
cg00618155	0.0702801	0.671889	0.58543	0.771116	1.53e-08	-0.416191	0.11625	0.000343434	0.659555	1	1	1
cg17967602	0.0703605	0.67175	0.585217	0.771079	1.56e-08	0.0171574	0.126158	0.891823	1.01731	0	0	0
cg09469554	0.0874402	1.63936	1.38117	1.94583	1.58e-08	0.154066	0.126897	0.224708	1.16657	1	0	0
cg11911951	0.068475	0.679427	0.594096	0.777014	1.66e-08	-0.101992	0.11344	0.368608	0.903037	1	0	0
cg11669824	0.0413182	0.792026	0.730415	0.858835	1.67e-08	-0.111878	0.135565	0.409217	0.894154	1	0	0
cg04915300	0.080578	0.634859	0.542112	0.743474	1.71e-08	-0.104648	0.117469	0.373004	0.900641	1	0	0
cg17470397	0.0621991	0.752163	0.681248	0.830461	1.73e-08	-0.466528	0.108226	1.63e-05	0.627176	1	1	1
cg13587725	0.0505253	0.70424	0.623415	0.795545	1.73e-08	-0.128574	0.126147	0.308088	0.879349	1	0	0
cg27504738	0.0848425	0.619877	0.524913	0.732021	1.73e-08	-0.101622	0.121102	0.401389	0.903371	1	0	0
cg26508164	0.0762458	0.651138	0.560754	0.75609	1.83e-08	-0.0531057	0.123368	0.666857	0.94828	1	0	0
cg23560676	0.0703671	0.673135	0.586416	0.772679	1.86e-08	-0.300226	0.115462	0.00931646	0.740651	1	1	1
cg25023198	0.0884414	0.608087	0.51131	0.723182	1.86e-08	-0.284447	0.127952	0.0262104	0.75243	1	1	1
cg19215199	0.0755805	0.653729	0.56372	0.758109	1.87e-08	-0.000739038	0.125738	0.99531	0.999261	1	0	0
cg13793048	0.0757913	0.653029	0.562884	0.757611	1.88e-08	-0.11324	0.128444	0.377979	0.892937	1	0	0
cg08778316	0.0796112	0.639216	0.546868	0.747159	1.9e-08	-0.149307	0.125924	0.235746	0.861305	1	0	0
cg22464570	0.0546706	0.735452	0.660721	0.818634	1.91e-08	-0.317032	0.100424	0.00159427	0.728307	1	1	1
cg06873498	0.0745182	0.657864	0.568468	0.761319	1.91e-08	-0.154023	0.136376	0.258731	0.857252	1	0	0
cg05249479	0.0836661	0.625184	0.530629	0.736588	1.98e-08	0.0287519	0.128226	0.82258	1.02917	0	0	0
cg08171142	0.066487	0.68861	0.604476	0.784453	2.01e-08	-0.324522	0.125184	0.00953194	0.722873	1	1	1
cg02911387	0.0657622	0.691681	0.608035	0.786833	2.08e-08	-0.108328	0.124182	0.38303	0.897334	1	0	0
cg02450004	0.054536	1.35749	1.21987	1.51063	2.09e-08	-0.155664	0.142216	0.273709	0.855846	1	0	0
cg26300322	0.0814305	0.633661	0.540186	0.743312	2.11e-08	-0.112932	0.119338	0.343984	0.893211	1	0	0
cg09093212	0.0703504	0.674336	0.587481	0.774032	2.13e-08	-0.255511	0.120623	0.0341525	0.77452	1	1	1
cg07709903	0.0751959	0.656419	0.566467	0.760656	2.17e-08	-0.143619	0.131113	0.27335	0.866218	1	0	0
cg13074802	0.0652831	0.693927	0.610583	0.788647	2.18e-08	-0.300909	0.113635	0.00809641	0.740145	1	1	1
cg10567810	0.0786834	1.55214	1.33032	1.81095	2.31e-08	0.0515837	0.131729	0.695362	1.05294	1	0	0
cg18016994	0.0445697	0.779724	0.714501	0.8509	2.37e-08	-0.00612994	0.130407	0.962508	0.993889	1	0	0
cg27051231	0.0802671	0.638982	0.545965	0.747846	2.41e-08	-0.180897	0.12429	0.145548	0.834521	1	0	0
cg17315844	0.0831365	0.628877	0.534318	0.74017	2.42e-08	-0.219547	0.127549	0.0852015	0.802883	1	0	0
cg26552774	0.0704939	0.675267	0.588127	0.775318	2.55e-08	-0.0640818	0.132507	0.628662	0.937928	1	0	0
cg13413384	0.0779279	0.648031	0.556242	0.754968	2.59e-08	-0.099291	0.120118	0.408455	0.905479	0	0	0
cg22075146	0.0908067	0.603314	0.50495	0.720838	2.63e-08	-0.0667385	0.129639	0.606692	0.93544	1	0	0
cg26673980	0.0825997	0.631621	0.537214	0.742618	2.66e-08	-0.373356	0.130592	0.00425042	0.68842	1	1	1
cg23010900	0.0740018	0.662701	0.573228	0.76614	2.7e-08	-0.179843	0.130603	0.168506	0.835402	1	0	0
cg07916058	0.0757309	0.65639	0.565848	0.76142	2.71e-08	-0.0691431	0.124661	0.579134	0.933193	1	0	0
cg04627863	0.0918275	0.600289	0.501414	0.718661	2.73e-08	-0.0548036	0.128297	0.669263	0.946671	1	0	0
cg08310400	0.0451067	0.778328	0.712472	0.850272	2.76e-08	-0.128942	0.135447	0.341109	0.879025	1	0	0
cg21861265	0.0739152	0.66323	0.573783	0.766621	2.77e-08	-0.0434492	0.113981	0.703058	0.957481	1	0	0
cg24304919	0.094256	1.68804	1.4033	2.03055	2.78e-08	0.133684	0.127872	0.295815	1.14303	1	0	0
cg01941895	0.08493	1.60272	1.35695	1.89299	2.79e-08	-0.00306768	0.131912	0.981446	0.996937	0	0	0
cg24540521	0.0356313	1.21879	1.13658	1.30695	2.81e-08	-0.0983411	0.167269	0.556585	0.90634	0	0	0
cg14136420	0.0764976	0.654133	0.563055	0.759943	2.88e-08	-0.402142	0.114656	0.000452535	0.668886	1	1	1
cg21767759	0.0844559	0.625883	0.530401	0.738554	2.88e-08	-0.134964	0.130046	0.299356	0.873748	1	0	0
cg19947621	0.0740391	0.663327	0.573727	0.766919	2.95e-08	-0.162113	0.122967	0.187388	0.850345	1	0	0
cg24197091	0.0647254	1.4313	1.26077	1.62489	3.02e-08	0.0343421	0.125402	0.784195	1.03494	1	0	0
cg11824191	0.0808664	0.638944	0.545292	0.74868	3.04e-08	-0.291871	0.123069	0.0177112	0.746865	1	1	1
cg06834507	0.0841569	0.627467	0.532055	0.739989	3.06e-08	0.101038	0.133473	0.449054	1.10632	0	0	0
cg02074591	0.0703582	1.47584	1.28573	1.69406	3.16e-08	-0.142924	0.142564	0.316089	0.86682	1	0	0
cg01119831	0.0819629	0.635456	0.541151	0.746195	3.17e-08	-0.019312	0.126848	0.878994	0.980873	1	0	0
cg06222012	0.091012	0.604451	0.505698	0.722488	3.17e-08	0.253545	0.132323	0.0553522	1.28858	0	0	0
cg25136124	0.0715963	0.687346	0.601781	0.785077	3.25e-08	-0.294991	0.113154	0.00913409	0.744538	1	1	1
cg03514977	0.0678301	0.673176	0.58504	0.774589	3.25e-08	-0.261183	0.130653	0.0456021	0.77014	1	1	1
cg12659065	0.0454355	0.777967	0.711682	0.850425	3.28e-08	-0.0763033	0.13048	0.558691	0.926535	1	0	0
cg10851168	0.0749661	0.660853	0.57055	0.765449	3.29e-08	-0.00478054	0.135281	0.97181	0.995231	1	0	0
cg02025737	0.0719614	0.67198	0.583583	0.773766	3.31e-08	0.0745863	0.121241	0.538429	1.07744	0	0	0
cg18948234	0.0625945	0.707906	0.626174	0.800306	3.41e-08	-0.0348818	0.12529	0.780699	0.96572	1	0	0
cg24650915	0.0862356	0.621402	0.52477	0.735828	3.44e-08	-0.216942	0.121671	0.0745828	0.804977	1	0	0
cg26467554	0.0538118	0.743192	0.6688	0.825858	3.48e-08	-0.182757	0.116527	0.116797	0.832971	1	0	0
cg09493063	0.0687743	1.46118	1.27692	1.67203	3.5e-08	-0.00797209	0.117092	0.945719	0.99206	0	0	0
cg05306107	0.0639891	0.70274	0.619908	0.79664	3.53e-08	-0.21517	0.115813	0.0631836	0.806405	1	0	0
cg17052212	0.0743239	0.663822	0.573835	0.76792	3.53e-08	-0.142413	0.114866	0.215043	0.867263	1	0	0
cg17876277	0.0691915	0.68294	0.59633	0.782129	3.56e-08	-0.191262	0.11714	0.102517	0.825916	1	0	0
cg03932201	0.0658481	0.695678	0.611446	0.791514	3.57e-08	-0.145267	0.126479	0.250743	0.864792	1	0	0
cg11601197	0.0463137	0.77476	0.70753	0.848378	3.58e-08	-0.302313	0.114855	0.00848507	0.739106	1	1	1
cg09786701	0.0709598	1.47838	1.28643	1.69898	3.6e-08	-0.122898	0.142911	0.389809	0.884354	0	0	0
cg06247108	0.0616428	0.712212	0.631159	0.803674	3.68e-08	-0.0825633	0.120621	0.49367	0.920753	1	0	0
cg04211309	0.0791228	0.646868	0.553945	0.755379	3.68e-08	-0.0292337	0.120545	0.808383	0.971189	1	0	0
cg09130077	0.080837	1.56048	1.33184	1.82838	3.69e-08	0.306855	0.128985	0.01736	1.35914	1	1	1
cg03896269	0.0939871	0.596136	0.495842	0.716716	3.72e-08	0.0265112	0.119571	0.824532	1.02687	0	0	0
cg12978253	0.119207	0.518934	0.410812	0.655512	3.74e-08	-0.0786462	0.140089	0.574523	0.924367	1	0	0
cg10195619	0.0450868	0.780388	0.714385	0.852488	3.8e-08	0.10275	0.140909	0.465885	1.10821	0	0	0
cg19721221	0.0795805	0.645673	0.552426	0.754661	3.86e-08	0.227076	0.130743	0.0824199	1.25492	0	0	0
cg14160419	0.0756464	0.659821	0.5689	0.765274	3.88e-08	0.21001	0.144676	0.146615	1.23369	0	0	0
cg02046017	0.0845902	0.628314	0.532321	0.741618	3.94e-08	-0.146498	0.128216	0.253212	0.863728	1	0	0
cg10301588	0.0815195	0.639038	0.544675	0.74975	3.95e-08	-0.351686	0.127434	0.00578458	0.703501	1	1	1
cg04568492	0.0559949	1.53518	1.31739	1.78897	3.99e-08	0.0846038	0.130478	0.516718	1.08829	1	0	0
cg02343503	0.078061	1.35999	1.21863	1.51775	3.99e-08	-0.176847	0.151363	0.24266	0.837908	1	0	0
cg18601167	0.0630632	1.41378	1.2494	1.59978	4e-08	0.0971342	0.126219	0.441555	1.10201	1	0	0
cg17494585	0.0466392	0.774078	0.706456	0.848172	4e-08	0.0620609	0.127488	0.626403	1.06403	0	0	0
cg23063047	0.0802637	0.661211	0.570413	0.766461	4.04e-08	-0.0864426	0.11705	0.460204	0.917188	1	0	0
cg06411447	0.0753643	0.643655	0.549962	0.753311	4.04e-08	-0.013932	0.12962	0.914406	0.986165	1	0	0
cg06441398	0.0776884	0.652869	0.560657	0.760247	4.06e-08	-0.101877	0.134134	0.447545	0.903141	1	0	0
cg02524010	0.0469442	0.661821	0.571109	0.766943	4.07e-08	-0.190005	0.129654	0.142792	0.826955	1	0	0
cg00325599	0.0752137	1.29385	1.18012	1.41855	4.07e-08	-0.112087	0.13401	0.402922	0.893966	0	0	0
cg22451100	0.0736704	0.667561	0.577807	0.771257	4.12e-08	-0.0778827	0.120526	0.518157	0.925073	1	0	0
cg18924331	0.0638744	0.704602	0.62169	0.798572	4.22e-08	-0.213683	0.113049	0.0587343	0.807604	1	0	0
cg07697275	0.0743388	0.6655	0.575269	0.769885	4.31e-08	-0.0764237	0.121922	0.530774	0.926424	1	0	0
cg20735282	0.0728308	0.671082	0.581811	0.774051	4.34e-08	-0.146635	0.121307	0.226744	0.863609	1	0	0
cg00770754	0.0670623	0.692715	0.607395	0.79002	4.39e-08	-0.168194	0.129229	0.193083	0.84519	1	0	0
cg25314624	0.0713176	0.676806	0.588516	0.778341	4.41e-08	-0.161204	0.118831	0.174917	0.851119	1	0	0
cg12878796	0.0791268	0.648573	0.5554	0.757376	4.45e-08	-0.14848	0.135311	0.272499	0.862017	1	0	0
cg01730177	0.0688187	0.686217	0.599629	0.785308	4.46e-08	-0.353318	0.111813	0.00157823	0.702354	1	1	1
cg09848947	0.069924	0.682134	0.594771	0.782328	4.48e-08	-0.199745	0.114712	0.0816367	0.81894	1	0	0
cg06685464	0.0626319	1.40859	1.24587	1.59257	4.5e-08	-0.147977	0.139832	0.289944	0.862451	1	0	0
cg19978209	0.054487	1.34721	1.21076	1.49905	4.5e-08	-0.220598	0.152567	0.148201	0.802039	0	0	0
cg26370484	0.0885592	0.616113	0.517939	0.732895	4.53e-08	-0.4701	0.125481	0.000179399	0.62494	1	1	1
cg15702677	0.0949323	0.595019	0.493997	0.7167	4.53e-08	0.0852073	0.12886	0.50846	1.08894	0	0	0
cg01196858	0.0945506	0.596309	0.495439	0.717717	4.55e-08	-0.0851548	0.125571	0.497683	0.91837	1	0	0
cg15272362	0.106728	1.79206	1.4538	2.20902	4.61e-08	-0.0569872	0.128539	0.657517	0.944606	0	0	0
cg18243846	0.0879987	0.61824	0.520298	0.734618	4.64e-08	-0.177707	0.121283	0.142861	0.837188	1	0	0
cg11317909	0.0570129	0.732379	0.654947	0.818965	4.68e-08	0.12259	0.142648	0.390126	1.13042	0	0	0
cg12987910	0.0683528	1.45255	1.27043	1.66079	4.72e-08	0.0833463	0.124164	0.502055	1.08692	1	0	0
cg16248432	0.0746814	0.665133	0.574566	0.769977	4.76e-08	-0.0264954	0.121381	0.827208	0.973853	1	0	0
cg26835417	0.0484894	0.767409	0.697835	0.84392	4.77e-08	-0.210625	0.125607	0.0935689	0.810078	1	0	0
cg06894612	0.0791716	0.649138	0.555835	0.758103	4.82e-08	-0.31203	0.113111	0.00580485	0.73196	1	1	1
cg22862441	0.0423032	1.25963	1.1594	1.36852	4.86e-08	0.0792924	0.115065	0.490755	1.08252	1	0	0
cg01981762	0.0830979	1.57351	1.33702	1.85184	4.89e-08	-0.0618566	0.132524	0.640674	0.940018	0	0	0
cg00808721	0.0683935	1.45207	1.2699	1.66036	4.94e-08	0.0354059	0.128985	0.783703	1.03604	1	0	0
cg02349468	0.0633487	0.707989	0.625323	0.801584	5e-08	-0.169534	0.127408	0.183307	0.844058	1	0	0
cg08726446	0.0657218	1.43066	1.25775	1.62735	5.06e-08	0.091721	0.122674	0.454652	1.09606	1	0	0
cg15864691	0.0771614	0.656829	0.564641	0.764068	5.11e-08	-0.124042	0.122638	0.311802	0.883343	1	0	0
cg23121785	0.0627354	0.710663	0.628439	0.803645	5.2e-08	-0.336554	0.109802	0.00217595	0.714227	1	1	1
cg04422625	0.101209	0.57641	0.472696	0.702879	5.22e-08	-0.231386	0.126155	0.066632	0.793433	1	0	0
cg02631468	0.0957728	1.68375	1.39559	2.03142	5.32e-08	-0.0418728	0.130742	0.748764	0.958992	0	0	0
cg10799386	0.0752119	0.664255	0.573211	0.76976	5.35e-08	0.0244246	0.12429	0.844208	1.02473	0	0	0
cg02878289	0.0628799	0.71039	0.62802	0.803564	5.39e-08	-0.16076	0.112215	0.151968	0.851496	1	0	0
cg12656291	0.0770573	1.52032	1.3072	1.76817	5.44e-08	0.238795	0.122827	0.0518762	1.26972	1	0	0
cg14654886	0.086084	1.59661	1.34873	1.89005	5.47e-08	0.0546359	0.127382	0.667985	1.05616	1	0	0
cg14051842	0.0699071	1.46176	1.27459	1.67642	5.61e-08	-0.0346808	0.121114	0.774611	0.965914	0	0	0
cg13808058	0.0776343	0.656059	0.563456	0.76388	5.66e-08	-0.321302	0.122912	0.00894647	0.725204	1	1	1
cg07102406	0.0604942	0.720119	0.639605	0.810769	5.71e-08	-0.384024	0.106601	0.000315258	0.681115	1	1	1
cg27271532	0.0717086	0.677634	0.588785	0.779891	5.74e-08	0.141988	0.136551	0.298425	1.15256	0	0	0
cg00688311	0.0907327	0.611341	0.511743	0.730324	5.84e-08	-0.11268	0.137014	0.410853	0.893437	1	0	0
cg24950749	0.0591275	0.72568	0.646272	0.814844	5.86e-08	-0.11098	0.122399	0.364563	0.894957	1	0	0
cg12020179	0.0780853	0.654803	0.561881	0.763092	5.88e-08	-0.10611	0.137803	0.44129	0.899325	1	0	0
cg26791488	0.0684957	0.689856	0.603191	0.788973	5.95e-08	0.246957	0.135725	0.068829	1.28012	0	0	0
cg18479972	0.0784541	1.5299	1.31185	1.7842	5.97e-08	0.368287	0.124389	0.00306877	1.44526	1	1	1
cg01101472	0.0710952	0.680349	0.591855	0.782074	6.05e-08	0.0266944	0.133395	0.841391	1.02705	0	0	0
cg15690598	0.0895037	0.615808	0.516725	0.73389	6.07e-08	-0.179373	0.123552	0.146555	0.835794	1	0	0
cg22008130	0.0725332	0.675139	0.58567	0.778276	6.1e-08	-0.0570931	0.124552	0.646674	0.944506	1	0	0
cg07051833	0.0834621	0.636404	0.540368	0.749507	6.14e-08	0.000653669	0.126451	0.995875	1.00065	0	0	0
cg03794617	0.0743707	0.668526	0.577848	0.773433	6.15e-08	0.0695805	0.125112	0.578112	1.07206	0	0	0
cg24414627	0.0762219	0.661974	0.570112	0.768636	6.22e-08	-0.139537	0.123548	0.25872	0.869761	1	0	0
cg19266578	0.0822157	1.56042	1.32819	1.83326	6.23e-08	0.179879	0.121579	0.139001	1.19707	1	0	0
cg25783550	0.0802571	1.54393	1.31921	1.80693	6.24e-08	0.089246	0.133625	0.504206	1.09335	1	0	0
cg02059519	0.0725685	0.675243	0.585719	0.778449	6.26e-08	-0.222044	0.123841	0.0729768	0.80088	1	0	0
cg13558899	0.071199	0.680454	0.591826	0.782355	6.4e-08	-0.029475	0.121623	0.80851	0.970955	1	0	0
cg08733496	0.0767752	0.660282	0.568039	0.767504	6.43e-08	-0.263491	0.123455	0.0328172	0.768364	1	1	1
cg09697510	0.0762375	0.662251	0.570334	0.768982	6.46e-08	-0.259345	0.12116	0.0323131	0.771557	1	1	1
cg26706803	0.0939827	0.601818	0.500572	0.723541	6.55e-08	-0.077006	0.122125	0.528334	0.925884	1	0	0
cg18222192	0.0893381	0.617198	0.51806	0.735308	6.61e-08	-0.147663	0.121816	0.225444	0.862722	1	0	0
cg07225255	0.0838313	0.635979	0.539616	0.749549	6.71e-08	-0.226809	0.116591	0.0517348	0.797073	1	0	0
cg09998133	0.0503263	1.31209	1.18885	1.44811	6.77e-08	0.242827	0.111187	0.0289657	1.27485	1	1	1
cg02374294	0.069714	0.686482	0.598809	0.786991	6.82e-08	-0.116522	0.120752	0.334559	0.890011	1	0	0
cg21374547	0.0626762	1.40229	1.24019	1.58557	6.87e-08	-0.0848513	0.132853	0.523029	0.918649	0	0	0
cg02202742	0.082297	0.641625	0.546047	0.753932	6.96e-08	0.0249723	0.130186	0.847882	1.02529	0	0	0
cg17066452	0.081733	0.643618	0.548349	0.755439	6.99e-08	0.0523669	0.133209	0.694233	1.05376	0	0	0
cg00390484	0.0770367	0.66025	0.56772	0.76786	7.09e-08	-0.0960101	0.135087	0.477253	0.908455	1	0	0
cg02222170	0.0667991	0.697861	0.612223	0.795478	7.23e-08	-0.520627	0.120034	1.44e-05	0.594148	1	1	1
cg25462190	0.0755566	0.66578	0.574138	0.772048	7.29e-08	-0.0547926	0.142546	0.700693	0.946681	1	0	0
cg25129097	0.0775349	0.658738	0.565868	0.76685	7.29e-08	0.124285	0.126087	0.324277	1.13234	0	0	0
cg24052475	0.0840778	0.635975	0.539353	0.749907	7.32e-08	-0.371061	0.118499	0.00174009	0.690002	1	1	1
cg03636234	0.0892943	0.618372	0.51909	0.736643	7.33e-08	0.000488866	0.138433	0.997182	1.00049	0	0	0
cg22151713	0.0898816	0.616482	0.516908	0.735238	7.37e-08	-0.397125	0.129449	0.00215626	0.67225	1	1	1
cg03157700	0.0712722	0.68144	0.592598	0.7836	7.39e-08	-0.0808272	0.117711	0.492299	0.922353	1	0	0
cg08993172	0.076616	1.51022	1.29964	1.75491	7.42e-08	0.285202	0.119377	0.0168906	1.33003	1	1	1
cg07047197	0.0579463	0.732195	0.653586	0.820259	7.48e-08	0.141328	0.14411	0.326742	1.1518	0	0	0
cg16090599	0.088664	0.620819	0.521788	0.738645	7.59e-08	0.0100048	0.120964	0.934083	1.01006	0	0	0
cg14290576	0.0948706	0.600545	0.498645	0.723269	7.66e-08	-0.256431	0.121417	0.0346882	0.773809	1	1	1
cg06949778	0.0813313	0.64589	0.550718	0.75751	7.67e-08	-0.27492	0.127104	0.0305448	0.759633	1	1	1
cg05479166	0.0560179	0.740048	0.663097	0.825928	7.7e-08	-0.457978	0.140933	0.00115557	0.632561	1	1	1
cg18443571	0.0891971	0.619202	0.519885	0.737492	7.71e-08	-0.345081	0.12218	0.0047373	0.708163	1	1	1
cg04600170	0.0749112	1.49556	1.29133	1.73208	7.74e-08	0.0271041	0.128174	0.832526	1.02747	1	0	0
cg09316122	0.089575	1.61797	1.35745	1.92849	7.8e-08	0.0312939	0.13304	0.814037	1.03179	1	0	0
cg18786643	0.0667438	0.698724	0.613047	0.796376	7.82e-08	-0.208372	0.125196	0.0960377	0.811905	1	0	0
cg07800320	0.0692891	1.45063	1.26642	1.66163	7.93e-08	-0.120598	0.138662	0.384452	0.886391	0	0	0
cg08354751	0.115821	0.537051	0.427985	0.673911	7.99e-08	-0.133008	0.128557	0.300846	0.875458	1	0	0
cg10023530	0.0796582	1.53338	1.31173	1.79248	8.04e-08	0.0527608	0.128772	0.682011	1.05418	1	0	0
cg09775930	0.0842365	1.57109	1.33198	1.85312	8.18e-08	0.100458	0.131421	0.444633	1.10568	0	0	0
cg26112996	0.0687184	0.691783	0.604612	0.791522	8.22e-08	-0.00608919	0.111323	0.956379	0.993929	1	0	0
cg08161138	0.0697561	0.687974	0.600061	0.788767	8.25e-08	0.0489261	0.137142	0.721274	1.05014	0	0	0
cg00232483	0.0872977	0.626432	0.527918	0.743331	8.43e-08	-0.301168	0.133576	0.0241544	0.739953	1	1	1
cg20737185	0.0700892	1.45574	1.26889	1.6701	8.43e-08	-0.0992437	0.137549	0.470594	0.905522	1	0	0
cg07093155	0.0946094	0.602432	0.500468	0.72517	8.48e-08	-0.0111537	0.122545	0.927479	0.988908	1	0	0
cg21002224	0.0837728	0.638441	0.541768	0.752364	8.49e-08	0.0340147	0.131891	0.796485	1.0346	0	0	0
cg11021321	0.0725172	0.678126	0.588279	0.781694	8.5e-08	-0.219392	0.112867	0.0519175	0.803007	1	0	0
cg07043604	0.0859448	0.652648	0.558277	0.76297	8.56e-08	-0.0912543	0.126847	0.47189	0.912786	1	0	0
cg19411734	0.079686	0.631136	0.533294	0.746929	8.56e-08	-0.0589887	0.125951	0.639537	0.942717	1	0	0
cg19017553	0.0898348	0.618162	0.518364	0.737173	8.59e-08	-0.283378	0.137957	0.039966	0.753235	1	1	1
cg16675381	0.0729369	1.47774	1.2809	1.70484	8.59e-08	0.0735261	0.131545	0.576202	1.0763	0	0	0
cg03920003	0.0908038	0.614994	0.514729	0.73479	8.61e-08	0.0501853	0.121152	0.678702	1.05147	0	0	0
cg03794981	0.0810712	0.647913	0.552725	0.759494	8.64e-08	-0.236089	0.114004	0.0383706	0.789711	1	1	1
cg03880173	0.0733586	1.48095	1.28262	1.70995	8.65e-08	-0.144367	0.140015	0.302499	0.86557	1	0	0
cg11053466	0.0850786	0.63422	0.53681	0.749305	8.69e-08	0.0903574	0.131895	0.493299	1.09457	0	0	0
cg00242526	0.0717853	0.681008	0.591628	0.783892	8.71e-08	-0.0961509	0.120717	0.425743	0.908327	1	0	0
cg20276103	0.0553315	1.3446	1.20641	1.49862	8.73e-08	0.00424393	0.123659	0.972622	1.00425	1	0	0
cg15413271	0.0682723	0.693998	0.607078	0.793363	8.77e-08	-0.171781	0.131006	0.189778	0.842164	1	0	0
cg08567517	0.0909446	0.620736	0.521235	0.739232	8.81e-08	-0.130371	0.123467	0.291008	0.87777	1	0	0
cg25714115	0.089137	0.614753	0.514385	0.734705	8.81e-08	-0.160605	0.130589	0.218753	0.851628	1	0	0
cg25609507	0.0779736	1.51759	1.30251	1.76817	8.82e-08	0.0702151	0.127347	0.58138	1.07274	1	0	0
cg13663218	0.0848987	1.57447	1.33312	1.85952	8.96e-08	-0.188775	0.137316	0.169209	0.827973	1	0	0
cg02708922	0.0418931	0.799364	0.736352	0.867769	9.02e-08	0.222082	0.157325	0.158064	1.24867	0	0	0
cg14143441	0.0606792	0.722997	0.641928	0.814305	9.03e-08	-0.328921	0.113366	0.00371486	0.7197	1	1	1
cg04899225	0.0805388	0.650187	0.555244	0.761366	9.03e-08	-0.32381	0.126421	0.0104265	0.723388	1	1	1
cg08495374	0.0424634	0.600235	0.497764	0.7238	9.07e-08	-0.137377	0.122802	0.263273	0.871642	1	0	0
cg14557510	0.0955093	1.25476	1.15455	1.36365	9.07e-08	-0.315513	0.177583	0.0756157	0.729414	0	0	0
cg05072470	0.07473	1.49079	1.28767	1.72594	9.13e-08	0.201257	0.135847	0.138476	1.22294	1	0	0
cg09610644	0.0573745	0.736056	0.65777	0.823661	9.23e-08	-0.168541	0.121	0.163648	0.844896	1	0	0
cg05262711	0.0833403	0.640746	0.544185	0.754441	9.24e-08	-0.0723938	0.124645	0.561376	0.930165	1	0	0
cg10515232	0.0476644	0.77527	0.706124	0.851187	9.28e-08	-0.224006	0.121407	0.0650254	0.79931	1	0	0
cg12515371	0.0673324	0.698058	0.611756	0.796535	9.37e-08	-0.489608	0.129404	0.0001546	0.612867	1	1	1
cg27423627	0.0675685	0.697218	0.610737	0.795945	9.42e-08	0.182444	0.15043	0.2252	1.20015	0	0	0
cg04055345	0.0804272	0.651078	0.556126	0.762241	9.52e-08	-0.258034	0.120484	0.0322219	0.772569	1	1	1
cg13448828	0.0837557	0.639649	0.542811	0.753763	9.56e-08	-0.135448	0.119441	0.256788	0.873325	1	0	0
cg16293835	0.0828203	0.642924	0.546592	0.756235	9.63e-08	-0.269179	0.129493	0.0376431	0.764006	1	1	1
cg03320492	0.0820068	0.645777	0.549893	0.75838	9.69e-08	0.28689	0.133443	0.0315619	1.33228	0	1	0
cg02319392	0.0867055	0.629869	0.53143	0.746542	9.76e-08	-0.187595	0.121659	0.123081	0.82895	1	0	0
cg17879101	0.0787251	0.657263	0.563285	0.76692	9.78e-08	-0.450659	0.118541	0.000143699	0.637208	1	1	1
cg23072051	0.0551607	0.745286	0.668914	0.830378	9.84e-08	0.522952	0.176721	0.0030844	1.687	0	1	0
cg26620900	0.0560557	0.741841	0.664655	0.827991	9.97e-08	-0.121243	0.111544	0.277055	0.885819	1	0	0
cg24505073	0.0684482	0.694469	0.607281	0.794174	1e-07	-0.084021	0.118168	0.477065	0.919412	1	0	0

## Sheet: Table S7
Table S7. 228-CpG signature of survival after adjusted for age, stage, and tumour subtypes.
CpG	Weight
cg00021325	0.602766
cg00051595	0.659072
cg00207865	0.0145871
cg00234027	-0.0453457
cg00300637	-0.0588857
cg00475883	-0.10358
cg00581482	0.07809
cg00593404	-0.0434018
cg00768195	-0.187519
cg00768574	-0.0551426
cg00884334	0.0329589
cg00890010	0.547849
cg01466976	0.000765074
cg01588438	0.144904
cg01815090	-0.299688
cg01823120	-0.158819
cg01945840	-0.328425
cg02036364	-0.250835
cg02047547	-0.0296941
cg02139586	-0.10126
cg02492205	-0.40814
cg02515467	-0.114064
cg02569853	-1.25489
cg02570563	-2.57623
cg02940165	-0.00829328
cg03068030	-0.074665
cg03131171	0.382319
cg03132015	-0.21479
cg03458229	-0.088911
cg03535049	-0.206282
cg03541791	3.59351
cg03560685	-0.354742
cg03646261	-0.0504028
cg03727359	-4.33369
cg03914707	-0.187301
cg04085768	-0.280216
cg04244056	-0.395983
cg04280480	0.142324
cg04435885	0.515102
cg04489069	0.174809
cg04503319	-0.328979
cg04690998	-0.0450203
cg04823219	-0.241107
cg05304405	-0.0315634
cg05347794	-0.411391
cg05390144	-0.160476
cg05801363	0.290126
cg05865866	-0.145122
cg05929572	0.526717
cg06055249	0.0871968
cg06079062	-0.0399353
cg06080005	0.140922
cg06159375	-0.131596
cg06211724	0.309834
cg06222012	-0.179622
cg06794209	-0.473777
cg06872257	0.278605
cg06884401	-0.17963
cg06937617	-0.0493299
cg07079059	0.127087
cg07130494	1.09896
cg07178066	0.7955
cg07287698	-0.206303
cg07361874	-0.371519
cg07365741	-0.046945
cg07495664	1.37346
cg07598561	0.00402619
cg07845873	0.105754
cg07918545	0.00121765
cg07965986	-0.227241
cg08110337	0.237215
cg08130630	-0.0820825
cg08190044	0.166903
cg08198193	-0.0920546
cg08201735	-0.0228487
cg08247887	-0.391881
cg08269941	1.0133
cg08794763	-0.182811
cg08821738	-0.401908
cg08947151	-0.135168
cg08961621	-0.0558658
cg09041862	1.2352
cg09516237	-0.235035
cg09610644	-0.285018
cg09869811	-0.430995
cg10164592	0.101787
cg10285337	0.166394
cg10533159	-0.0112702
cg10585208	0.112524
cg10666909	0.0865758
cg10852861	0.0391024
cg10869531	-0.339668
cg11115622	0.57081
cg11271171	-0.204725
cg11313862	-0.0303855
cg11323985	-0.236665
cg11337160	-0.321845
cg11384512	4.24877
cg11424828	0.123696
cg11425149	0.554874
cg11482794	-0.093705
cg11525280	0.15985
cg11550865	-0.3924
cg11679014	-0.135037
cg11683482	0.192824
cg11685510	0.12486
cg11708778	0.32972
cg11820026	0.324442
cg11909064	-0.0619537
cg12120360	-0.483128
cg12273284	0.32577
cg12419685	-0.00383176
cg12592779	-0.843488
cg12683641	-0.0387346
cg13059495	0.485799
cg13168407	0.0782193
cg13352717	-0.330582
cg13680438	0.420495
cg13713830	0.0416477
cg13898762	0.194735
cg13945442	-0.242679
cg13965612	-0.0240119
cg14115218	0.0595542
cg14166189	-0.291926
cg14444287	-0.0592629
cg14510812	0.0226465
cg14529406	0.0308464
cg14552106	0.248501
cg14587401	0.113416
cg14623381	0.148662
cg14767442	-0.677851
cg15410675	-0.062802
cg16074990	-0.00755321
cg16140954	-0.183337
cg16191297	-0.292111
cg16210979	-0.0821813
cg16334314	0.27987
cg16443954	-0.00996139
cg16470423	-0.456553
cg16496526	-0.0165294
cg16649560	-0.38474
cg16721191	-0.144781
cg17312632	0.0598589
cg17359753	0.261385
cg17630138	0.293664
cg17712416	-0.276071
cg17811589	-0.227877
cg17816771	-0.00634642
cg17826753	0.0828077
cg17888563	-0.644376
cg17900047	-0.629268
cg18016730	0.205233
cg18087256	-0.0993582
cg18373317	-0.343812
cg18375494	0.0737849
cg18565510	-0.896284
cg18565783	0.211056
cg18694313	-0.13732
cg18790856	-0.173206
cg18811601	-0.0191965
cg19003884	0.0102176
cg19045344	-0.123563
cg19054360	-0.0209311
cg19063061	0.393416
cg19100138	0.010994
cg19113599	0.16041
cg19384241	0.331986
cg19425513	-0.171357
cg19429599	-0.439684
cg19535369	-1.26737
cg19547330	-0.277304
cg19675935	0.590158
cg19833103	-5.2e-05
cg19988426	0.0595617
cg20025977	-0.0146488
cg20094085	0.787188
cg20167126	0.174871
cg20607798	0.0425097
cg20905760	0.0020232
cg20946037	-0.140806
cg20991347	0.382726
cg21616785	-0.00756044
cg21851351	0.199649
cg21857959	0.283746
cg21878369	0.082083
cg22062984	0.142409
cg22138998	-0.0711522
cg22409383	0.249278
cg22454005	-0.102176
cg22672606	0.160568
cg22799757	0.324262
cg22910862	-0.109671
cg23023126	-0.460193
cg23077449	-0.928027
cg23254302	0.121985
cg23384093	0.101703
cg23606171	-0.364414
cg23609905	0.253521
cg23712458	0.444428
cg23796967	-0.209442
cg23938300	-0.0667822
cg24004478	0.131916
cg24121168	-0.248483
cg24182470	0.196045
cg24183338	1.31614
cg24996930	-0.106993
cg25109431	0.319764
cg25130671	0.200497
cg25396728	0.0278093
cg25421566	-0.100746
cg25501930	0.241121
cg25508181	-0.161233
cg25609507	0.0475369
cg25721451	0.562809
cg25735823	0.775705
cg25976170	-0.125485
cg26224173	-0.226797
cg26225417	-0.0419611
cg26292018	0.212552
cg26554054	-0.0610407
cg26631039	0.032323
cg26739149	-0.177075
cg27148193	-0.0775491
cg27172745	2.18539
cg27182012	-0.15767
cg27286069	0.7211
cg27318539	0.120769
cg27646075	0.128329
